# Supplementary material
Source: Royal Society of Chemistry journal article supplement (doi:10.1039/d6ta02009g)
Supplement: d6ta02009g1.pdf [file d6ta02009g1.pdf]

## *Supporting Information*

# **Chirality Engineering in Layered Metal Hydroxides for Enhanced Electrocatalytic Oxygen Evolution and Reaction Mechanism Revelation**

Weiran Suo,<sup>a,†</sup> Jieling Zhang,<sup>b,†</sup> Yiwen Cao,<sup>b</sup> Yuan Wang,<sup>a,\*</sup> Zhimin Li,<sup>a,\*</sup> Zuozhong  
Liang,<sup>b,\*</sup> Haoquan Zheng,<sup>b,\*</sup> and Rui Cao<sup>b,\*</sup>

W. Suo, Y. Wang, Z. Li

<sup>a</sup>School of Advanced Materials and Nanotechnology, Xidian University, Xi'an 710126, China.

E-mail: yuanwang@mail.xidian.edu.cn; zml@mail.xidian.edu.cn.

J. Zhang, Y. Cao, Z. Liang, H. Zheng, R. Cao

<sup>b</sup>Key Laboratory of Applied Surface and Colloid Chemistry, Ministry of Education, School of Chemistry and Chemical Engineering, Shaanxi Normal University, Xi'an 710119, China.

E-mail: liangzuozhong@snnu.edu.cn; zhenghaoquan@snnu.edu.cn; ruicao@snnu.edu.cn.

<sup>†</sup>These authors contributed equally to this work.

## Experimental Section

### *General materials*

Cobalt nitrate hexahydrate ( $\text{Co}(\text{NO}_3)_2 \cdot 6\text{H}_2\text{O}$ ,  $\geq 99\%$ ) was purchased from Aladdin. L-threonine (L-Thr,  $\geq 99\%$ ), D-threonine (D-Thr,  $\geq 99\%$ ), triethylamine ( $\text{C}_6\text{H}_{15}\text{N}$ ,  $\geq 99\%$ ), titanium sulfate ( $\text{Ti}(\text{SO}_4)_2$ ,  $\geq 96\%$ ), anhydrous sodium sulfate ( $\text{Na}_2\text{SO}_4$ ,  $\geq 99\%$ ), potassium hydroxide (KOH,  $\geq 95\%$ ) were purchased from Macklin. Anhydrous ethanol ( $\geq 99.7\%$ ) was purchased from Tianjin Fuyu Fine Chemical Co., Ltd. Nafion solution (D520, 5%) was purchased from DuPont Company. All reagents were used as received without further purification.

### *Synthesis*

Chiral  $\text{Co}(\text{OH})_2$  nanomaterials were synthesized using a liquid phase synthesis method. Cobalt nitrate hexahydrate (1.2 g) and chiral L/D-Thr at varying concentrations (0, 1, 3, 5, and 10 mmol) were dissolved in water (40 mL). The mixture was subjected to magnetic stirring at room temperature until complete dissolution and homogeneity were achieved. Subsequently, triethylamine (5 mL) was added dropwise to the solution. Following an additional 3 min of stirring, the solution was transferred to a hydrothermal reactor and heated at 180 °C for 10 h. The resulting products were then centrifuged at 6000 rpm for 3 min and washed with water and anhydrous ethanol for three times. Finally, the products were dried overnight at 60 °C to yield  $\text{Co}(\text{OH})_2$  nanomaterials, denoted as **0L**, **0D**, **1L**, **1D**, **3L**, **3D**, **5L**, **5D**, **10L**, and **10D**.

### *Characterization*

X-ray diffraction (XRD) patterns of materials were measured using a diffractometer with a  $\text{Cu-K}\alpha$  radiation source operating at 40 kV and 40 mA (D8-Advance, Bruker). Morphologies of materials were taken using a scanning electron microscopy (SEM) at 15 kV and 0.2 nA (Apreo HiVac, FEI) and a transmission electron microscopy (TEM, Talos F200x, FEI). The thickness and spin polarization of materials were measured by an atomic force microscopy (AFM, Dimension Icon, Bruker). Specific surface areas of materials were measured by a fully automatic gas adsorption analyzer (ASAP 2460, Micromeritics). Laser confocal Raman spectra

of materials were measured by a Raman spectrometer (Reinshaw inVa). Ultraviolet-visible (UV-vis) spectra of materials were measured with a spectrophotometer (Pulsar TU-1901). Circular dichroism (CD) spectra of materials were measured by a spectroscopy using a 150 W xenon lamp with the spectrum of anhydrous ethanol as a baseline (Chirascan, Applied Photophysics). X-ray photoelectron spectroscopy (XPS) results of materials were obtained with a spectrometer (PHI Versaprobe 4). X-ray absorption fine structure spectroscopy (XAFS) results of materials were measured by a spectrometer (easyXAFS300+).

### ***Electrochemical Studies***

In a typical procedure, 4 mg of catalysts (**1L**, **3L**, **5L**, and **10L**), 375  $\mu\text{L}$  water, 125  $\mu\text{L}$  anhydrous ethanol, and 50  $\mu\text{L}$  Nafion (5 wt%) were mixed in a vortex mixer. The samples were then sonicated for 1 h to obtain a suspension. A drop of the obtained suspension (5  $\mu\text{L}$ ) was coated on a GC electrode (0.07  $\text{cm}^2$ ) and dried naturally in air. Electrochemical tests were carried out with an electrochemical analyzer (CHI 660e) using a typical three-electrode system, with a catalyst-loaded GC electrode as the working electrode, a carbon rod as the counter electrode, and a Hg/HgO electrode as the reference electrode. Linear scanning voltammetry (LSV) data were obtained at 0.005  $\text{V s}^{-1}$  with 100%  $iR$  compensation. Tafel plots were obtained by measuring LSV at a low scan rate. Electrochemical impedance spectroscopy (EIS) was performed at 0.696 V (vs Hg/HgO) with an amplitude of 0.005 V in the range of 1  $\sim$   $1 \times 10^5$  Hz. Cyclic voltammetry (CV) tests with different scan rates were conducted between 0.02 and 0.10  $\text{V s}^{-1}$  without  $iR$  compensation. Stability tests were performed by loading the catalyst ink on a carbon cloth electrode. The potential  $E$  (versus reversible hydrogen electrode, vs RHE) was calculated with Equation (S1).

$$E(\text{vs RHE}) = E(\text{vs Hg/HgO}) + V_{\text{Hg/HgO}} (0.098 \text{ V}) + 0.059 \times \text{pH} \quad (\text{S1})$$

The potential  $E$  (versus normal hydrogen electrode, vs NHE) was calculated with Equation (S2).

$$E(\text{vs NHE}) = E(\text{vs Hg/HgO}) + V_{\text{Hg/HgO}} (0.098 \text{ V}) \quad (\text{S2})$$

### ***Titanium sulfate photometric method for detecting hydrogen peroxide***

The catalyst material (1L and 10L) was coated on a glassy carbon electrode as the working electrode. A carbon rod was selected as the counter electrode and Ag/AgCl was selected as the reference electrode. The electrolysis was carried out in neutral solution (0.5 M Na<sub>2</sub>SO<sub>4</sub>) at  $E = 1.7$  V (vs RHE) for 1h. Then, the electrolyte (5 mL) was mixed with acidic Ti(SO<sub>4</sub>)<sub>2</sub> solution (0.3 mol L<sup>-1</sup> H<sub>2</sub>SO<sub>4</sub> and 3 mmol L<sup>-1</sup> Ti(SO<sub>4</sub>)<sub>2</sub>) for 5 min. The content of H<sub>2</sub>O<sub>2</sub> was detected using a UV-visible spectrophotometer.

### ***Theoretical Calculations***

Adsorption energy calculations were carried out with the CASTEP module in the Materials Studio 8.0 software package. Crystal structures of Co(OH)<sub>2</sub> with different crystal planes were constructed. Generalized gradient approximation (GGA) with Perdew-Burke-Ernzerhof (PBE) and projector augmented wave (PAW) pseudopotential were selected to describe interactions between core and electrons. An energy cutoff of 300 eV was used for the plane-wave expansion. The Monkhorst Pack of a  $2 \times 2 \times 1$  k-point grid was selected. The predicted crystal habit of Co(OH)<sub>2</sub> was obtained by the crystal morphology prediction model with the Bravais Friedel Donnay Harker (BFDH) method.

Density of states of Co(OH)<sub>2</sub> with different spin states and calculations of intermediate adsorption energy in reaction processes were carried out using the Vienna Ab initio Simulation Package (VASP 6.3.2). The GGA of PBE function was used to describe the exchange-correlation energy. The PAW method and pseudopotentials were used to describe the interactions between valence electrons and ions. A  $3 \times 2 \times 1$  k-point grid under Monkhorst-Pack was used in the optimization process. The truncation energy of 500 eV was set. The lattice parameters and ionic positions of all crystal structures were fully relaxed. The convergence criteria for the total energy of all relaxed atoms and the final force were  $10^{-5}$  eV and 0.03 eV Å<sup>-1</sup>, respectively. To correct for the localization effect of d-orbital electrons in transition metal atoms, the Hubbard+U method was used, and the effective U value of Co was 2.5 eV. In the

low spin state formed by the strong crystal field, the initial magnetic moment of Co ion was set to 1  $\mu\text{B}$ . However, in the corresponding high-spin state under the weak crystal field condition, the initial magnetic moment configuration is 3  $\mu\text{B}$ .

### ***Calculation of anisotropy factor (g-factor)***

The g-factor represents the degree of asymmetry extinction of the circularly polarized light and can be used as an index to evaluate the chiroptical activity of substances among different systems. The g-factor was calculated with Equation (S3).

$$g - \text{factor} = \frac{A_{LCP} - A_{RCP}}{A_{LCP} + A_{RCP}} = \frac{\Delta A}{A_{total}} \approx \frac{\text{CD}(\text{mdeg})}{32980 \cdot \text{Abs}} \quad (\text{S3})$$

The CD values and extinction values were obtained from circular dichroism spectra and the corresponding UV-vis spectra at the same concentration, respectively.

### **Calculation of adsorption energy**

The adsorption energies of threonine on different crystalline surfaces were calculated with Equation (S4).

$$\Delta G = E_{\text{total}} - E_{\text{surface}} - E_{\text{adsorbate}} \quad (\text{S4})$$

### **Calculation of spin polarization (P)**

Spin polarization ( $P$ ) can be quantified using the Equation S5.

$$P = \frac{I_{\text{up}} - I_{\text{down}}}{I_{\text{up}} + I_{\text{down}}} \times 100\% \quad (\text{S5})$$

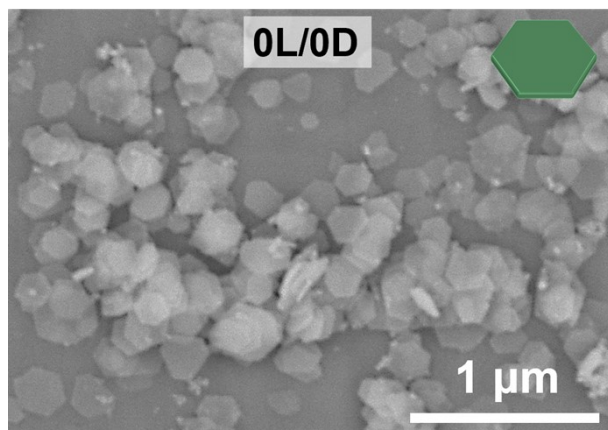

**Fig. S1.** SEM image of  $\text{Co(OH)}_2$  obtained without adding amino acids.

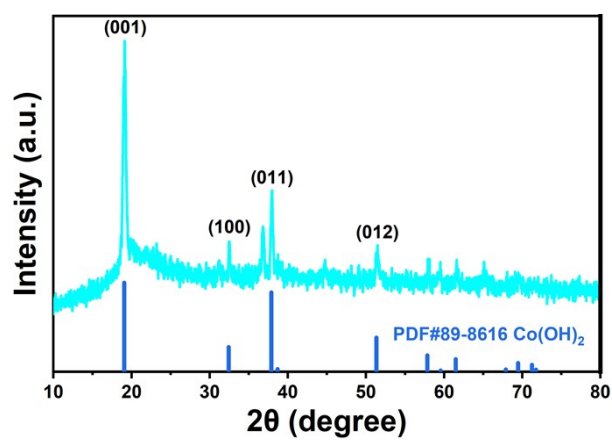

**Fig. S2.** XRD pattern of Co(OH)<sub>2</sub> obtained without adding amino acids.

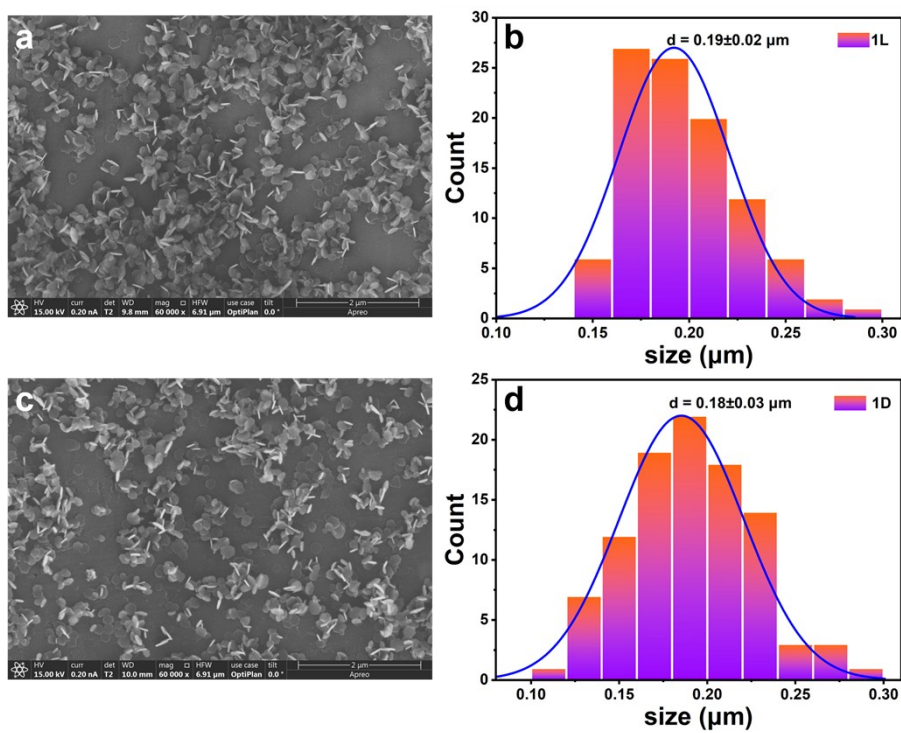

**Fig. S3.** (a, c) SEM images and (b, d) size distribution diagrams of **1L** (a, b) and **1D** (c, d).

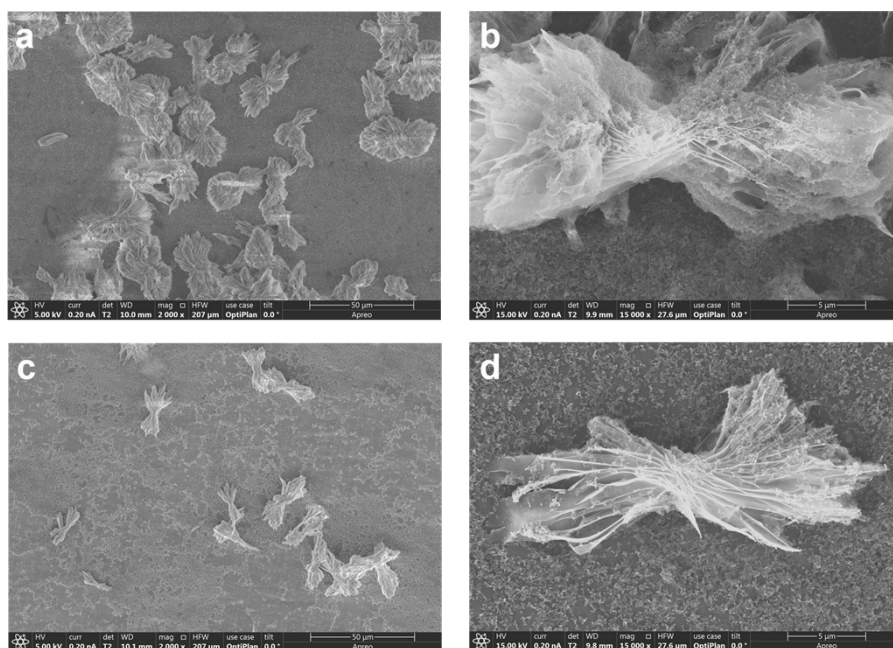

**Fig. S4.** SEM images of (a, b) 3L and 3D (c, d).

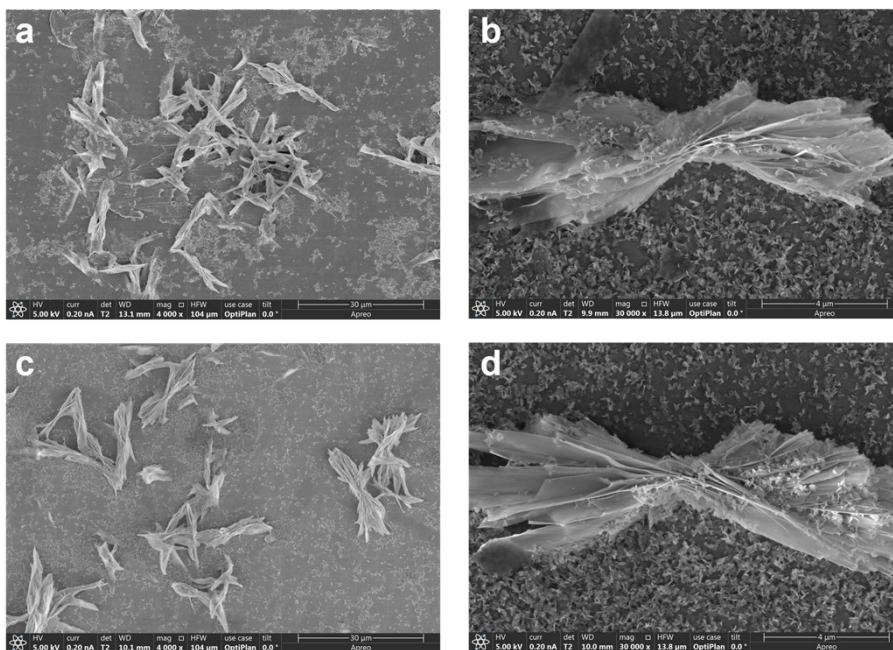

**Fig. S5.** SEM images of (a, b) **5L** and (c, d) **5D**.

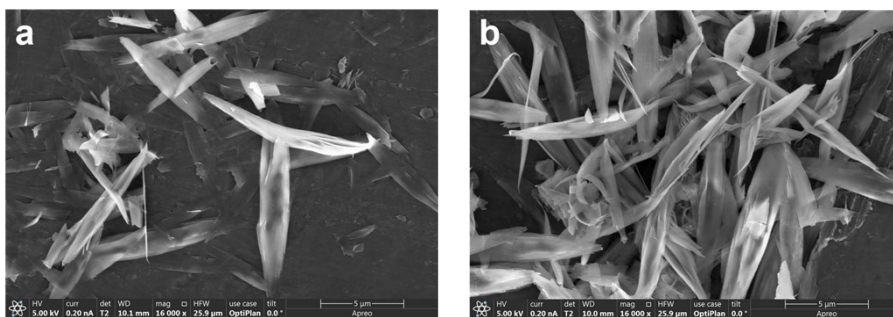

**Fig. S6.** SEM images of (a) **10L** and (b) **10D**.

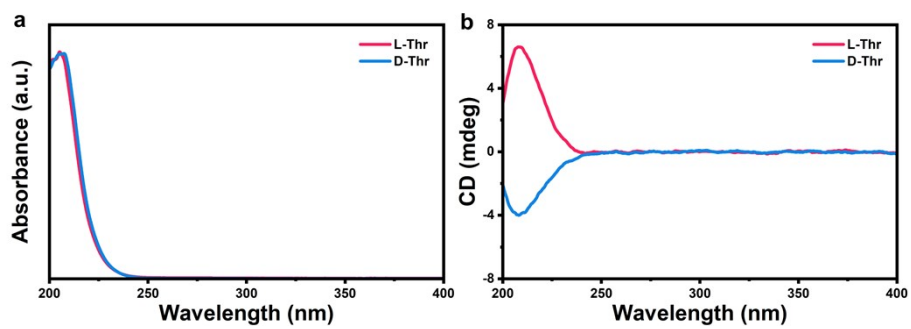

**Fig. S7.** (a) UV-vis and (b) CD spectra of L/D-Thr. Dissolve a quantity of L/D-Thr in deionised water to make a 0.1 M solution and test for UV-vis and CD in the 200 ~ 400 nm range.

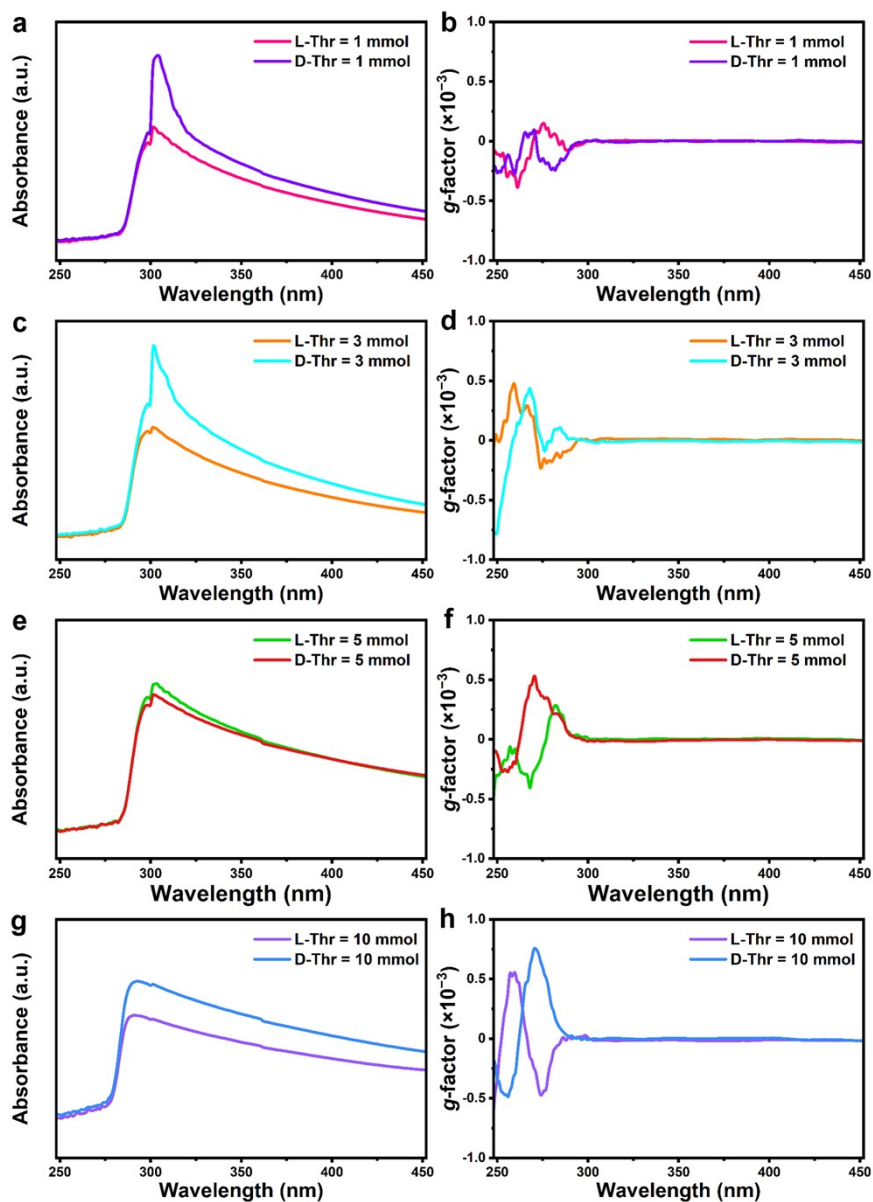

**Fig. S8.** (a, c, e, and g) UV-vis spectra and (b, d, f, and h)  $g$ -factor of (a and b) **1L/1D**, (c and d) **3L/3D**, (e and f) **5L/5D**, and (g and h) **10L/10D**.

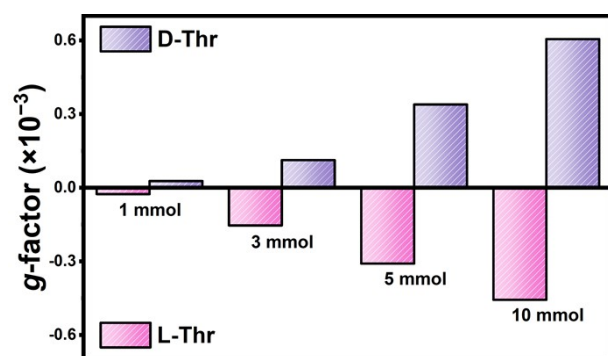

**Fig. S9.** Peak values of  $g$ -factors.

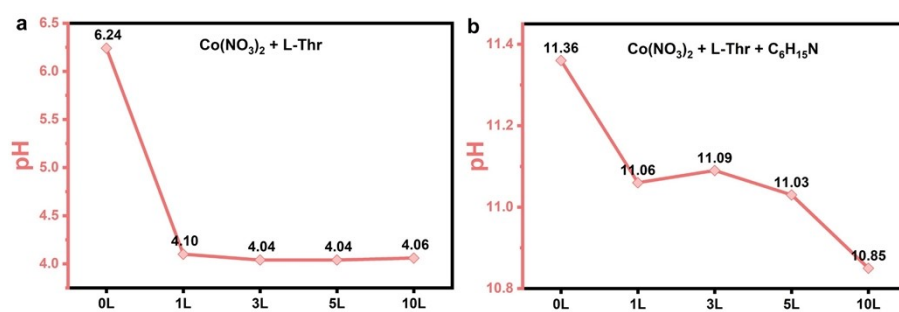

**Fig. S10.** The pH values of precursor solutions before (a) and after (b) the addition of triethylamine. The 0L stands for the adding amount of L-Thr is 0 mmol.

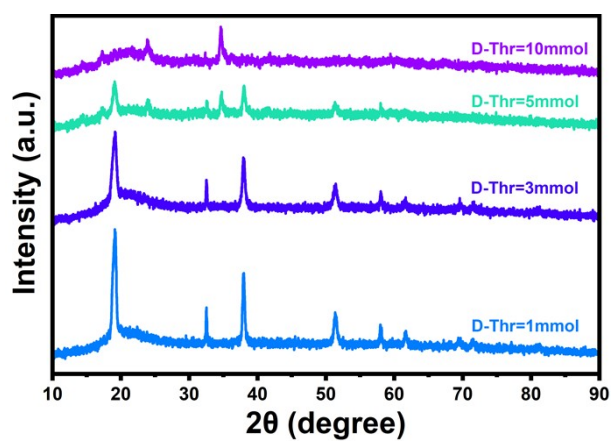

**Fig. S11.** XRD patterns of Co-based nanomaterials (1D, 3D, 5D, and 10D).

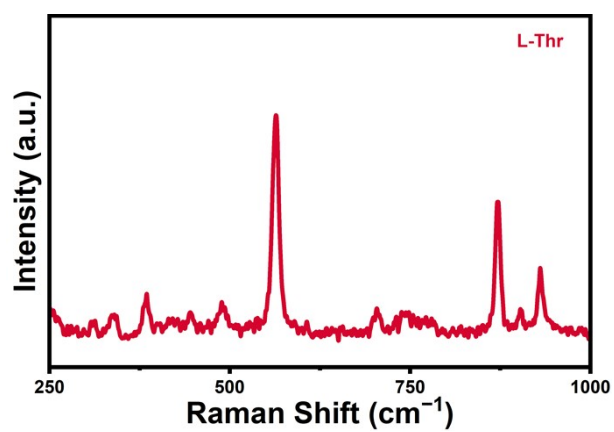

**Fig. S12.** Raman spectrum of L-Thr.

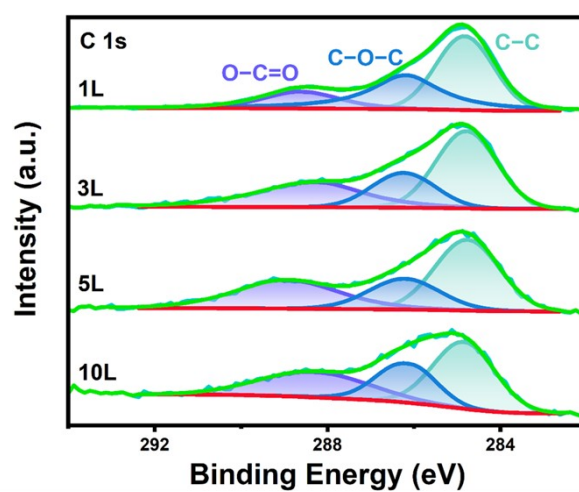

**Fig. S13.** XPS C 1s spectra of Co-based nanomaterials (**1D**, **3D**, **5D**, and **10D**).

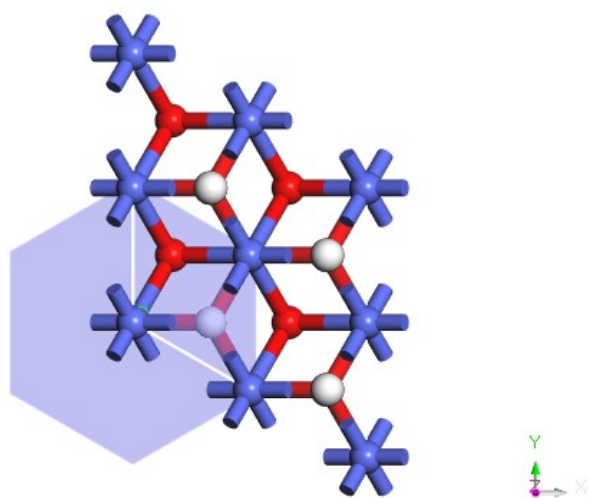

**Fig. S14.** Calculated crystal habit based on the crystal structure of  $\text{Co}(\text{OH})_2$ .

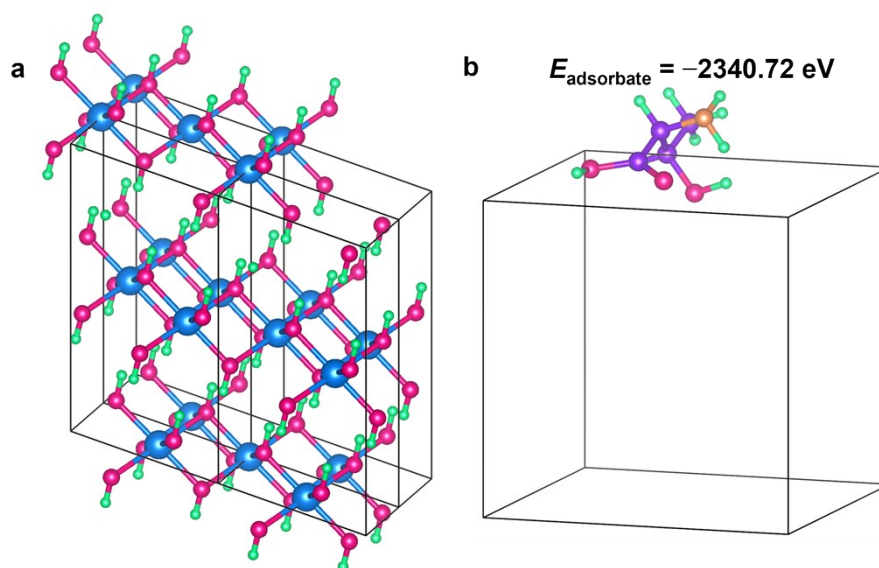

**Fig. S15.** Computational models of (a)  $\text{Co(OH)}_2$  supercell and (b) Thr molecule.

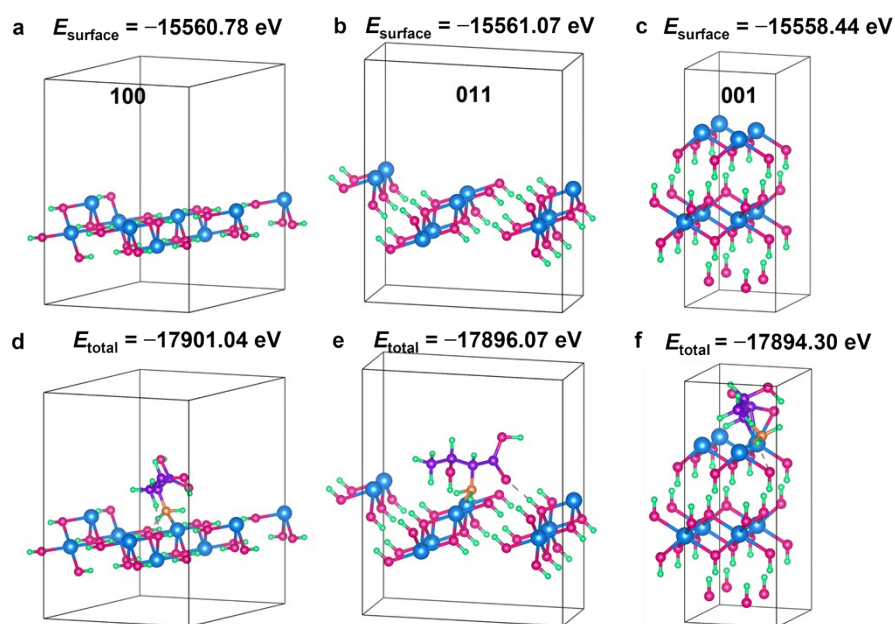

**Fig. S16.** Computational models of (a) (100), (b) (011), and (c) (001) crystal surface of  $\text{Co}(\text{OH})_2$  supercell. Computational models for Thr adsorption on the crystal surface (d) (100), (e) (011), and (f) (001) of  $\text{Co}(\text{OH})_2$  supercells.

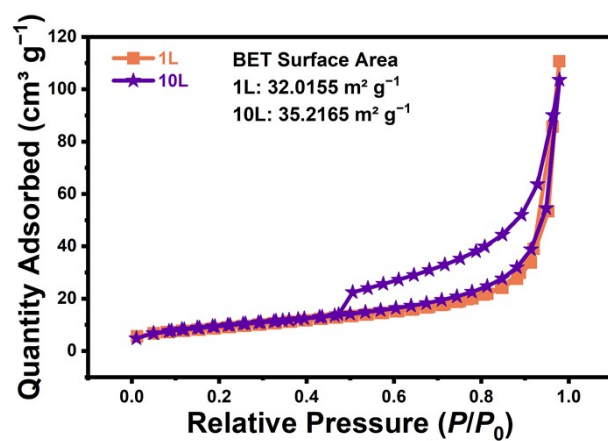

**Fig. S17.** N<sub>2</sub> isothermal adsorption and desorption data of 1L and 10L.

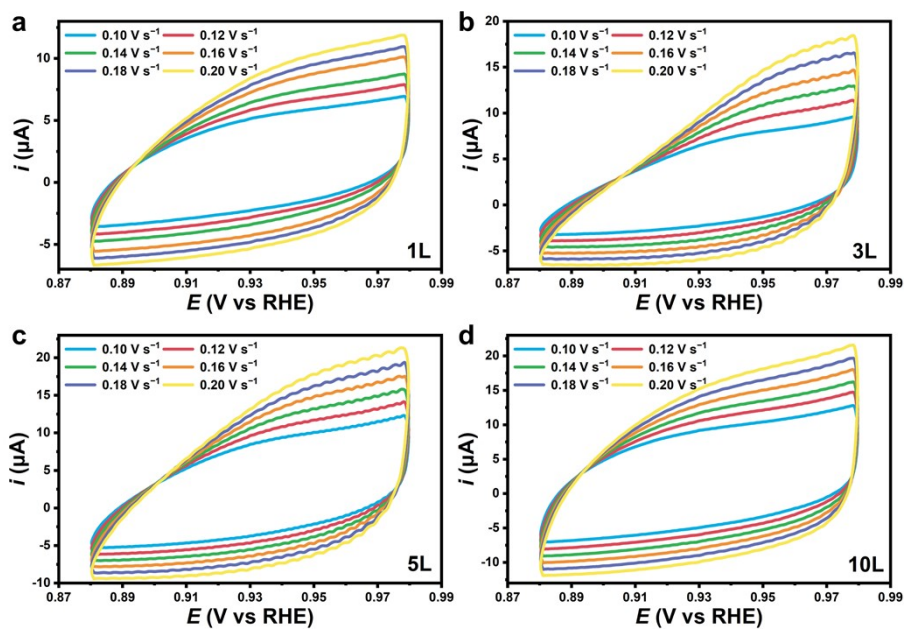

**Fig. S18.** CV data of (a) 1L, (b) 3L, (c) 5L, and (d) 10L in the non-Faradaic region with different scan rates (0.10, 0.12, 0.14, 0.18, and 0.20  $\text{V s}^{-1}$ ).

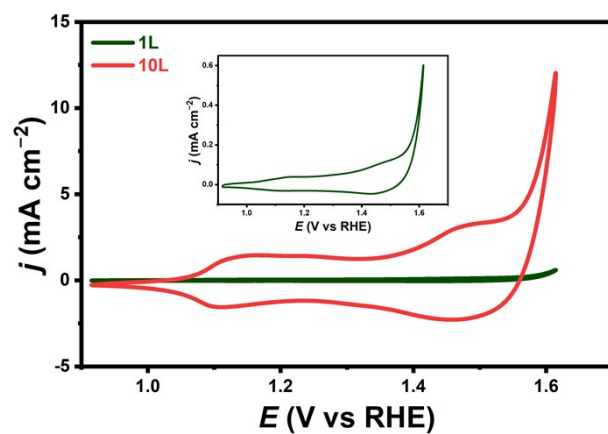

**Fig. S19.** CV data of 1L and 10L at 0.50 V s<sup>-1</sup>. The insert Fig. is the enlarged CV data of 1L.

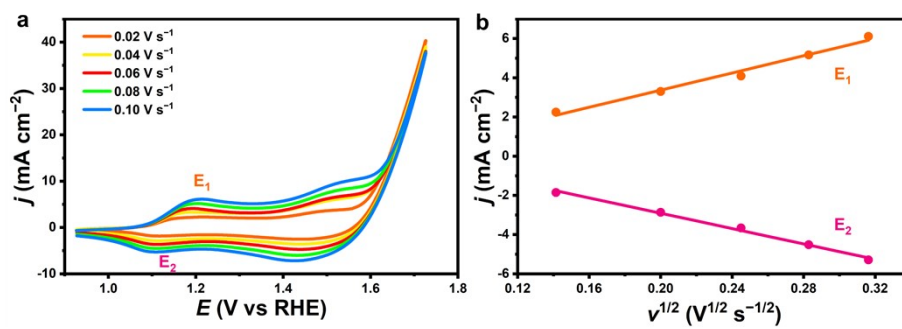

**Fig. S20.** (a) CV data of **10L** at different scan rates and (b) the relationship between scan rates and redox peak current densities.

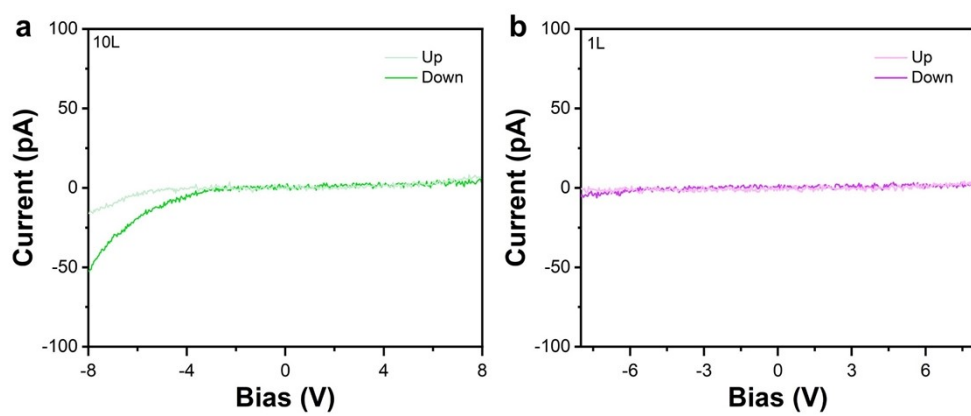

**Fig. S21.**  $I$ - $V$  curves of 10L (a) and 1L (b) measured with conductive AFM (c-AFM).

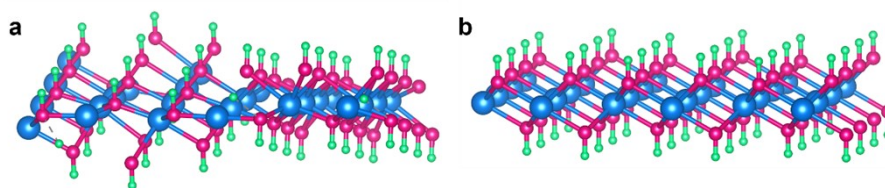

**Fig. S22.** Computational modellings of Co(OH)<sub>2</sub> with (a) high spin state and (b) low spin state.

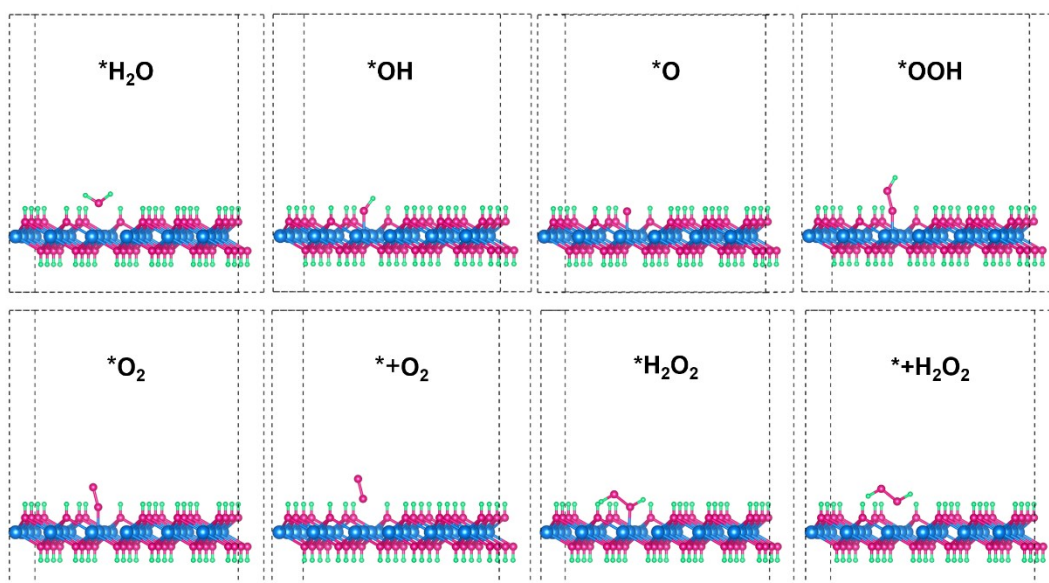

**Fig. S23.** Computational models of the adsorption of different reaction intermediates on  $\text{Co}(\text{OH})_2$  with low spin state.

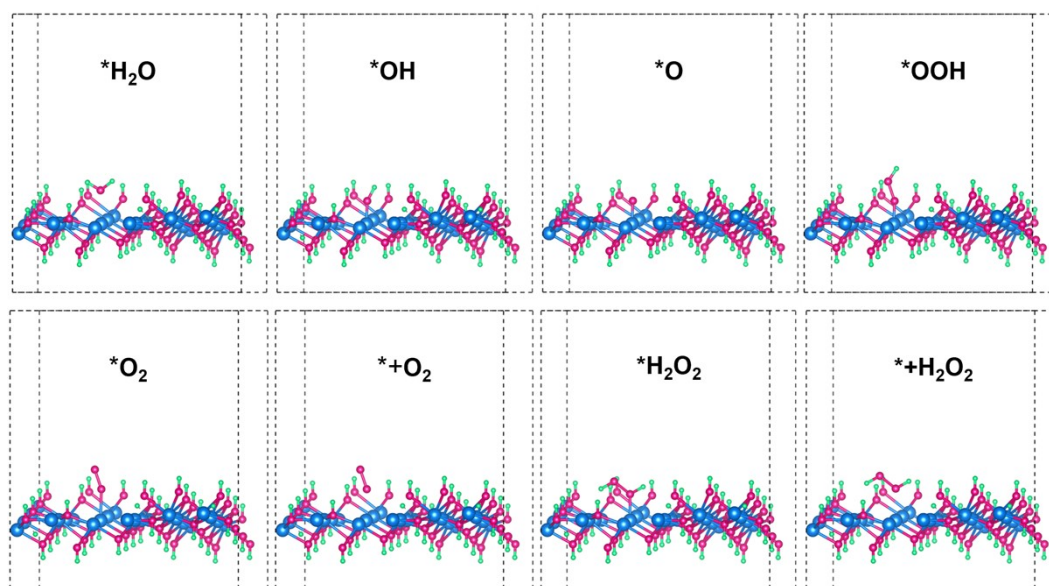

**Fig. S24.** Computational models of the adsorption of different reaction intermediates on  $\text{Co}(\text{OH})_2$  with high spin state.

## Structure parameters

### Co(OH)<sub>2</sub>

|    |        | <i>x</i> | <i>y</i> | <i>z</i> |
|----|--------|----------|----------|----------|
| 1  | Co Co0 | 0.31106  | 0.25048  | 0.50022  |
| 2  | Co Co1 | 0.06033  | 0.00021  | 0.99975  |
| 3  | Co Co2 | 0.81032  | 0.74983  | 0.49981  |
| 4  | Co Co3 | 0.56055  | 0.49988  | 0.00018  |
| 5  | H H4   | 0.42049  | 0.02525  | 0.71178  |
| 6  | H H5   | 0.17959  | 0.77650  | 0.21212  |
| 7  | H H6   | 0.91430  | 0.53014  | 0.71256  |
| 8  | H H7   | 0.67624  | 0.27364  | 0.21189  |
| 9  | H H8   | 0.95330  | 0.22568  | 0.78797  |
| 10 | H H9   | 0.71839  | 0.97145  | 0.28761  |
| 11 | H H10  | 0.45281  | 0.72308  | 0.78792  |
| 12 | H H11  | 0.20925  | 0.47300  | 0.28811  |
| 13 | O O12  | 0.36762  | 0.97435  | 0.60927  |
| 14 | O O13  | 0.11843  | 0.72374  | 0.10972  |
| 15 | O O14  | 0.85955  | 0.47506  | 0.61011  |
| 16 | O O15  | 0.61953  | 0.22311  | 0.10947  |
| 17 | O O16  | 0.00427  | 0.27671  | 0.89044  |
| 18 | O O17  | 0.76317  | 0.02596  | 0.39010  |
| 19 | O O18  | 0.50207  | 0.77652  | 0.89040  |
| 20 | O O19  | 0.25453  | 0.52540  | 0.39060  |

### Co(OH)<sub>2</sub> (1 0 0)

*x*      *y*      *z*

|       |      |         |         |         |
|-------|------|---------|---------|---------|
| 1 Co  | Co1  | 0.00025 | 0.99642 | 0.39997 |
| 2 Co  | Co2  | 0.37806 | 0.50919 | 0.34682 |
| 3 Co  | Co3  | 0.25581 | 0.02246 | 0.29383 |
| 4 Co  | Co4  | 0.13377 | 0.53602 | 0.24089 |
| 5 H   | H5   | 0.39810 | 0.25502 | 0.21121 |
| 6 H   | H6   | 0.26481 | 0.71526 | 0.37210 |
| 7 H   | H7   | 0.14475 | 0.22972 | 0.31587 |
| 8 H   | H8   | 0.01929 | 0.74162 | 0.26541 |
| 9 H   | H9   | 0.49206 | 0.30307 | 0.32414 |
| 10 H  | H10  | 0.36770 | 0.81512 | 0.27435 |
| 11 H  | H11  | 0.24664 | 0.32946 | 0.21806 |
| 12 H  | H12  | 0.11271 | 0.78969 | 0.37839 |
| 13 O  | O13  | 0.37327 | 0.15530 | 0.20000 |
| 14 O  | O14  | 0.23915 | 0.61610 | 0.35914 |
| 15 O  | O15  | 0.11785 | 0.13016 | 0.30427 |
| 16 O  | O16  | 0.49469 | 0.64219 | 0.25340 |
| 17 O  | O17  | 0.01697 | 0.40285 | 0.33494 |
| 18 O  | O18  | 0.39443 | 0.91524 | 0.28384 |
| 19 O  | O19  | 0.27278 | 0.42933 | 0.22850 |
| 20 O  | O20  | 0.13838 | 0.88979 | 0.38798 |
| 21 Co | Co21 | 0.50025 | 0.99642 | 0.39997 |
| 22 Co | Co22 | 0.87806 | 0.50919 | 0.34682 |
| 23 Co | Co23 | 0.75581 | 0.02246 | 0.29383 |
| 24 Co | Co24 | 0.63377 | 0.53602 | 0.24089 |
| 25 H  | H25  | 0.89810 | 0.25502 | 0.21121 |
| 26 H  | H26  | 0.76481 | 0.71526 | 0.37210 |

|      |     |         |          |          |
|------|-----|---------|----------|----------|
| 27 H | H27 | 0.64475 | 0.22972  | 0.31587  |
| 28 H | H28 | 0.51929 | 0.74162  | 0.26541  |
| 29 H | H29 | 0.99206 | 0.30307  | 0.32414  |
| 30 H | H30 | 0.86770 | 0.81512  | 0.27435  |
| 31 H | H31 | 0.74664 | 0.32946  | 0.21806  |
| 32 H | H32 | 0.61271 | 0.78969  | 0.37839  |
| 33 O | O33 | 0.87327 | 0.15530  | 0.20000  |
| 34 O | O34 | 0.73915 | 0.61610  | 0.35914  |
| 35 O | O35 | 0.61785 | 0.13016  | 0.30427  |
| 36 O | O36 | 0.99469 | 0.64219  | 0.25340  |
| 37 O | O37 | 0.51697 | 0.40285  | 0.33494  |
| 38 O | O38 | 0.89443 | 0.91524  | 0.28384  |
| 39 O | O39 | 0.77278 | 0.42933  | 0.22850  |
| 40 O | O40 | 0.63838 | 0.88979  | 0.38798  |
| 41 C | C41 | 0.70397 | -0.46434 | -0.43992 |
| 42 C | C42 | 0.57250 | -0.47270 | -0.40356 |
| 43 C | C43 | 0.47388 | -0.56115 | -0.46747 |
| 44 C | C44 | 0.34193 | -0.56858 | -0.43250 |
| 45 H | H45 | 0.71464 | -0.41528 | -0.50912 |
| 46 H | H46 | 0.77778 | -0.39813 | -0.39334 |
| 47 H | H47 | 0.71641 | -0.57349 | -0.44431 |
| 48 O | O48 | 0.55549 | -0.32835 | -0.39818 |
| 49 H | H49 | 0.56538 | -0.28164 | -0.46584 |
| 50 H | H50 | 0.56070 | -0.52218 | -0.33449 |
| 51 N | N51 | 0.49205 | -0.49314 | -0.55814 |
| 52 H | H52 | 0.58797 | -0.48651 | -0.58232 |

|      |     |         |          |          |
|------|-----|---------|----------|----------|
| 53 H | H53 | 0.48048 | -0.38676 | -0.55243 |
| 54 O | O54 | 0.26342 | -0.48854 | -0.47922 |
| 55 O | O55 | 0.28646 | -0.66653 | -0.35729 |
| 56 H | H56 | 0.18419 | -0.70953 | -0.36814 |
| 57 H | H57 | 0.48598 | -0.67041 | -0.47221 |

**Co(OH)<sub>2</sub> (0 0 1)**

|      |     | <i>x</i> | <i>y</i> | <i>z</i> |
|------|-----|----------|----------|----------|
| 1 Co | Co1 | 0.00084  | 0.00228  | 0.69743  |
| 2 Co | Co2 | 0.49340  | 0.00054  | 0.35796  |
| 3 Co | Co3 | 0.25057  | 0.50184  | 0.69715  |
| 4 Co | Co4 | 0.24341  | 0.50000  | 0.35826  |
| 5 H  | H5  | 0.24133  | 0.16859  | 0.16264  |
| 6 H  | H6  | 0.00299  | 0.67137  | 0.50201  |
| 7 H  | H7  | 0.48805  | 0.67309  | 0.16317  |
| 8 H  | H8  | 0.25137  | 0.16862  | 0.50186  |
| 9 H  | H9  | 0.48978  | 0.33118  | 0.21432  |
| 10 H | H10 | 0.25460  | 0.82883  | 0.55322  |
| 11 H | H11 | 0.23955  | 0.82860  | 0.21429  |
| 12 H | H12 | 0.49992  | 0.33013  | 0.55356  |
| 13 O | O13 | 0.23905  | 0.16859  | 0.09310  |
| 14 O | O14 | 0.49654  | 0.66946  | 0.43256  |
| 15 O | O15 | 0.48481  | 0.66888  | 0.09368  |
| 16 O | O16 | 0.24715  | 0.16896  | 0.43239  |
| 17 O | O17 | 0.49113  | 0.33132  | 0.28382  |
| 18 O | O18 | 0.25284  | 0.83245  | 0.62274  |

|            |          |         |         |
|------------|----------|---------|---------|
| 19 O O19   | 0.24003  | 0.83115 | 0.28379 |
| 20 O O20   | 0.49841  | 0.33164 | 0.62308 |
| 21 Co Co21 | 0.50084  | 0.00228 | 0.69743 |
| 22 Co Co22 | 0.99340  | 0.00054 | 0.35796 |
| 23 Co Co23 | 0.75057  | 0.50184 | 0.69715 |
| 24 Co Co24 | 0.74341  | 0.50000 | 0.35826 |
| 25 H H25   | 0.74133  | 0.16859 | 0.16264 |
| 26 H H26   | 0.50299  | 0.67137 | 0.50201 |
| 27 H H27   | 0.98805  | 0.67309 | 0.16317 |
| 28 H H28   | 0.75137  | 0.16862 | 0.50186 |
| 29 H H29   | 0.98978  | 0.33118 | 0.21432 |
| 30 H H30   | 0.75460  | 0.82883 | 0.55322 |
| 31 H H31   | 0.73955  | 0.82860 | 0.21429 |
| 32 H H32   | 0.99992  | 0.33013 | 0.55356 |
| 33 O O33   | 0.73905  | 0.16859 | 0.09310 |
| 34 O O34   | 0.99654  | 0.66946 | 0.43256 |
| 35 O O35   | 0.98481  | 0.66888 | 0.09368 |
| 36 O O36   | 0.74715  | 0.16896 | 0.43239 |
| 37 O O37   | 0.99113  | 0.33132 | 0.28382 |
| 38 O O38   | 0.75284  | 0.83245 | 0.62274 |
| 39 O O39   | 0.74003  | 0.83115 | 0.28379 |
| 40 O O40   | 0.99841  | 0.33164 | 0.62308 |
| 41 C C41   | -1.19687 | 0.50606 | 0.87829 |
| 42 C C42   | -1.42647 | 0.48429 | 0.90759 |
| 43 C C43   | -1.55763 | 0.43546 | 0.81787 |
| 44 C C44   | -1.78806 | 0.41688 | 0.84606 |

|      |     |          |         |         |
|------|-----|----------|---------|---------|
| 45 H | H45 | -1.17966 | 0.65988 | 0.82499 |
| 46 H | H46 | -1.09848 | 0.54402 | 0.94423 |
| 47 H | H47 | -1.14319 | 0.33048 | 0.84387 |
| 48 O | O48 | -1.49836 | 0.71711 | 0.95269 |
| 49 H | H49 | -1.48209 | 0.86559 | 0.90019 |
| 50 H | H50 | -1.44548 | 0.33021 | 0.96061 |
| 51 N | N51 | -1.52897 | 0.64207 | 0.74918 |
| 52 H | H52 | -1.36206 | 0.65620 | 0.73025 |
| 53 H | H53 | -1.58062 | 0.81146 | 0.78415 |
| 54 O | O54 | -1.93675 | 0.61794 | 0.82073 |
| 55 O | O55 | -1.86899 | 0.18788 | 0.89027 |
| 56 H | H56 | -2.02960 | 0.15500 | 0.86478 |
| 57 H | H57 | -1.50442 | 0.26018 | 0.78306 |

**Co(OH)<sub>2</sub> (0 1 1)**

|      |     | <i>x</i> | <i>y</i> | <i>z</i> |
|------|-----|----------|----------|----------|
| 1 Co | Co1 | 0.00020  | 0.00269  | 0.47573  |
| 2 Co | Co2 | 0.42435  | 0.28552  | 0.26655  |
| 3 Co | Co3 | 0.28288  | 0.85784  | 0.33612  |
| 4 Co | Co4 | 0.14148  | 0.43007  | 0.40589  |
| 5 H  | H5  | 0.05582  | 0.78717  | 0.47192  |
| 6 H  | H6  | 0.48473  | 0.06986  | 0.26339  |
| 7 H  | H7  | 0.33532  | 0.64308  | 0.33419  |
| 8 H  | H8  | 0.20028  | 0.21415  | 0.40184  |
| 9 H  | H9  | 0.36993  | 0.50126  | 0.27037  |
| 10 H | H10 | 0.23629  | 0.07277  | 0.33874  |

|       |      |         |         |         |
|-------|------|---------|---------|---------|
| 11 H  | H11  | 0.08688 | 0.64550 | 0.40894 |
| 12 H  | H12  | 0.01456 | 0.92792 | 0.20000 |
| 13 O  | O13  | 0.03950 | 0.84520 | 0.42917 |
| 14 O  | O14  | 0.46438 | 0.12728 | 0.22016 |
| 15 O  | O15  | 0.31834 | 0.69986 | 0.29029 |
| 16 O  | O16  | 0.18201 | 0.27223 | 0.35923 |
| 17 O  | O17  | 0.38529 | 0.44329 | 0.31313 |
| 18 O  | O18  | 0.24832 | 0.01580 | 0.38249 |
| 19 O  | O19  | 0.10123 | 0.58822 | 0.45238 |
| 20 O  | O20  | 0.02699 | 0.87033 | 0.24316 |
| 21 Co | Co21 | 0.50020 | 0.00269 | 0.47573 |
| 22 Co | Co22 | 0.92435 | 0.28552 | 0.26655 |
| 23 Co | Co23 | 0.78288 | 0.85784 | 0.33612 |
| 24 Co | Co24 | 0.64148 | 0.43007 | 0.40589 |
| 25 H  | H25  | 0.55582 | 0.78717 | 0.47192 |
| 26 H  | H26  | 0.98473 | 0.06986 | 0.26339 |
| 27 H  | H27  | 0.83532 | 0.64308 | 0.33419 |
| 28 H  | H28  | 0.70028 | 0.21415 | 0.40184 |
| 29 H  | H29  | 0.86993 | 0.50126 | 0.27037 |
| 30 H  | H30  | 0.73629 | 0.07277 | 0.33874 |
| 31 H  | H31  | 0.58688 | 0.64550 | 0.40894 |
| 32 H  | H32  | 0.51456 | 0.92792 | 0.20000 |
| 33 O  | O33  | 0.53950 | 0.84520 | 0.42917 |
| 34 O  | O34  | 0.96438 | 0.12728 | 0.22016 |
| 35 O  | O35  | 0.81834 | 0.69986 | 0.29029 |
| 36 O  | O36  | 0.68201 | 0.27223 | 0.35923 |

|      |     |          |         |         |
|------|-----|----------|---------|---------|
| 37 O | O37 | 0.88529  | 0.44329 | 0.31313 |
| 38 O | O38 | 0.74832  | 0.01580 | 0.38249 |
| 39 O | O39 | 0.60123  | 0.58822 | 0.45238 |
| 40 O | O40 | 0.52699  | 0.87033 | 0.24316 |
| 41 C | C41 | -1.48073 | 0.29316 | 0.59442 |
| 42 C | C42 | -1.42042 | 0.40122 | 0.62426 |
| 43 C | C43 | -1.58568 | 0.48937 | 0.58962 |
| 44 C | C44 | -1.52542 | 0.59798 | 0.61792 |
| 45 H | H45 | -1.48845 | 0.29083 | 0.51851 |
| 46 H | H46 | -1.35834 | 0.22730 | 0.61922 |
| 47 H | H47 | -1.64012 | 0.28171 | 0.62336 |
| 48 O | O48 | -1.20993 | 0.41689 | 0.58558 |
| 49 H | H49 | -1.21910 | 0.41505 | 0.51171 |
| 50 H | H50 | -1.41314 | 0.40452 | 0.70013 |
| 51 N | N51 | -1.59168 | 0.48281 | 0.48920 |
| 52 H | H52 | -1.63246 | 0.40377 | 0.46938 |
| 53 H | H53 | -1.43497 | 0.49338 | 0.46230 |
| 54 O | O54 | -1.44365 | 0.66958 | 0.54942 |
| 55 O | O55 | -1.56784 | 0.63714 | 0.71196 |
| 56 H | H56 | -1.61298 | 0.72423 | 0.71106 |
| 57 H | H57 | -1.74551 | 0.47823 | 0.61827 |

**Co(OH)<sub>2</sub>-High Spin**

|      |     | <i>x</i> | <i>y</i> | <i>z</i> |
|------|-----|----------|----------|----------|
| 1 Co | Co1 | 0.02156  | 0.00011  | 0.29532  |
| 2 Co | Co2 | 0.14012  | 0.16660  | 0.24790  |

|            |          |         |         |
|------------|----------|---------|---------|
| 3 H H3     | 0.05365  | 0.22372 | 0.39548 |
| 4 H H4     | 0.17575  | 0.05614 | 0.38006 |
| 5 H H5     | -0.00734 | 0.11032 | 0.19643 |
| 6 H H6     | 0.11581  | 0.27613 | 0.18386 |
| 7 O O7     | 0.03736  | 0.22308 | 0.34796 |
| 8 O O8     | 0.16055  | 0.05625 | 0.33241 |
| 9 O O9     | 0.00644  | 0.11037 | 0.24427 |
| 10 O O10   | 0.12917  | 0.27698 | 0.23175 |
| 11 Co Co11 | 0.26777  | 0.00011 | 0.26737 |
| 12 Co Co12 | 0.39012  | 0.16660 | 0.24790 |
| 13 H H13   | 0.29985  | 0.22372 | 0.36752 |
| 14 H H14   | 0.42195  | 0.05614 | 0.35211 |
| 15 H H15   | 0.23886  | 0.11032 | 0.16847 |
| 16 H H16   | 0.36201  | 0.27613 | 0.15591 |
| 17 O O17   | 0.28356  | 0.22308 | 0.32000 |
| 18 O O18   | 0.40676  | 0.05625 | 0.30445 |
| 19 O O19   | 0.25264  | 0.11037 | 0.21631 |
| 20 O O20   | 0.37537  | 0.27698 | 0.20380 |
| 21 Co Co21 | 0.51397  | 0.00011 | 0.23941 |
| 22 Co Co22 | 0.64012  | 0.16660 | 0.24790 |
| 23 H H23   | 0.54605  | 0.22372 | 0.33957 |
| 24 H H24   | 0.66815  | 0.05614 | 0.32415 |
| 25 H H25   | 0.48506  | 0.11032 | 0.14052 |
| 26 H H26   | 0.60822  | 0.27613 | 0.12795 |
| 27 O O27   | 0.52976  | 0.22308 | 0.29205 |
| 28 O O28   | 0.65296  | 0.05625 | 0.27650 |

|            |          |         |         |
|------------|----------|---------|---------|
| 29 O O29   | 0.49884  | 0.11037 | 0.18836 |
| 30 O O30   | 0.62158  | 0.27698 | 0.17585 |
| 31 Co Co31 | 0.76017  | 0.00011 | 0.21146 |
| 32 Co Co32 | 0.89012  | 0.16660 | 0.24790 |
| 33 H H33   | 0.79226  | 0.22372 | 0.31161 |
| 34 H H34   | 0.91435  | 0.05614 | 0.29620 |
| 35 H H35   | 0.73126  | 0.11032 | 0.11256 |
| 36 H H36   | 0.85442  | 0.27613 | 0.10000 |
| 37 O O37   | 0.77597  | 0.22308 | 0.26409 |
| 38 O O38   | 0.89916  | 0.05625 | 0.24854 |
| 39 O O39   | 0.74504  | 0.11037 | 0.16040 |
| 40 O O40   | 0.86778  | 0.27698 | 0.14789 |
| 41 Co Co41 | 0.00997  | 0.33345 | 0.27373 |
| 42 Co Co42 | 0.14012  | 0.49993 | 0.24790 |
| 43 H H43   | -0.00066 | 0.55705 | 0.29852 |
| 44 H H44   | 0.16953  | 0.38947 | 0.38337 |
| 45 H H45   | 0.00153  | 0.44366 | 0.17230 |
| 46 H H46   | 0.17013  | 0.60947 | 0.11343 |
| 47 O O47   | 0.00927  | 0.55642 | 0.25028 |
| 48 O O48   | 0.15434  | 0.38958 | 0.33571 |
| 49 O O49   | 0.00878  | 0.44371 | 0.22073 |
| 50 O O50   | 0.15725  | 0.61032 | 0.16138 |
| 51 Co Co51 | 0.25902  | 0.33345 | 0.25970 |
| 52 Co Co52 | 0.39012  | 0.49993 | 0.24790 |
| 53 H H53   | 0.24554  | 0.55705 | 0.32647 |
| 54 H H54   | 0.41573  | 0.38947 | 0.35541 |

|       |      |         |         |         |
|-------|------|---------|---------|---------|
| 55 H  | H55  | 0.25058 | 0.44366 | 0.15827 |
| 56 H  | H56  | 0.41633 | 0.60947 | 0.14138 |
| 57 O  | O57  | 0.25548 | 0.55642 | 0.27823 |
| 58 O  | O58  | 0.40054 | 0.38958 | 0.30776 |
| 59 O  | O59  | 0.25783 | 0.44371 | 0.20670 |
| 60 O  | O60  | 0.40345 | 0.61032 | 0.18933 |
| 61 Co | Co61 | 0.50807 | 0.33345 | 0.24567 |
| 62 Co | Co62 | 0.64012 | 0.49993 | 0.24790 |
| 63 H  | H63  | 0.49174 | 0.55705 | 0.35443 |
| 64 H  | H64  | 0.66193 | 0.38947 | 0.32746 |
| 65 H  | H65  | 0.49963 | 0.44366 | 0.14423 |
| 66 H  | H66  | 0.66254 | 0.60947 | 0.16934 |
| 67 O  | O67  | 0.50168 | 0.55642 | 0.30618 |
| 68 O  | O68  | 0.64674 | 0.38958 | 0.27980 |
| 69 O  | O69  | 0.50688 | 0.44371 | 0.19267 |
| 70 O  | O70  | 0.64965 | 0.61032 | 0.21728 |
| 71 Co | Co71 | 0.75712 | 0.33345 | 0.23164 |
| 72 Co | Co72 | 0.89012 | 0.49993 | 0.24790 |
| 73 H  | H73  | 0.73794 | 0.55705 | 0.38238 |
| 74 H  | H74  | 0.90813 | 0.38947 | 0.29950 |
| 75 H  | H75  | 0.74868 | 0.44366 | 0.13020 |
| 76 H  | H76  | 0.90874 | 0.60947 | 0.19729 |
| 77 O  | O77  | 0.74788 | 0.55642 | 0.33414 |
| 78 O  | O78  | 0.89294 | 0.38958 | 0.25185 |
| 79 O  | O79  | 0.75593 | 0.44371 | 0.17863 |
| 80 O  | O80  | 0.89585 | 0.61032 | 0.24524 |

|              |          |         |         |
|--------------|----------|---------|---------|
| 81 Co Co81   | 0.01674  | 0.66678 | 0.22378 |
| 82 Co Co82   | 0.14135  | 0.83327 | 0.22960 |
| 83 H H83     | -0.00061 | 0.89039 | 0.29783 |
| 84 H H84     | 0.12161  | 0.72281 | 0.31301 |
| 85 H H85     | 0.04708  | 0.77699 | 0.10020 |
| 86 H H86     | 0.17018  | 0.94280 | 0.11274 |
| 87 O O87     | 0.00932  | 0.88975 | 0.24959 |
| 88 O O88     | 0.13264  | 0.72292 | 0.26488 |
| 89 O O89     | 0.03462  | 0.77704 | 0.14819 |
| 90 O O90     | 0.15730  | 0.94365 | 0.16069 |
| 91 Co Co91   | 0.26579  | 0.66678 | 0.23781 |
| 92 Co Co92   | 0.39040  | 0.83327 | 0.24363 |
| 93 H H93     | 0.24559  | 0.89039 | 0.32578 |
| 94 H H94     | 0.36781  | 0.72281 | 0.34096 |
| 95 H H95     | 0.29328  | 0.77699 | 0.12815 |
| 96 H H96     | 0.41638  | 0.94280 | 0.14070 |
| 97 O O97     | 0.25552  | 0.88975 | 0.27754 |
| 98 O O98     | 0.37885  | 0.72292 | 0.29283 |
| 99 O O99     | 0.28082  | 0.77704 | 0.17614 |
| 100 O O100   | 0.40350  | 0.94365 | 0.18864 |
| 101 Co Co101 | 0.51484  | 0.66678 | 0.25184 |
| 102 Co Co102 | 0.63945  | 0.83327 | 0.25766 |
| 103 H H103   | 0.49179  | 0.89039 | 0.35374 |
| 104 H H104   | 0.61401  | 0.72281 | 0.36891 |
| 105 H H105   | 0.53948  | 0.77699 | 0.15611 |
| 106 H H106   | 0.66259  | 0.94280 | 0.16865 |

|        |       |         |         |         |
|--------|-------|---------|---------|---------|
| 107 O  | O107  | 0.50173 | 0.88975 | 0.30550 |
| 108 O  | O108  | 0.62505 | 0.72292 | 0.32079 |
| 109 O  | O109  | 0.52702 | 0.77704 | 0.20410 |
| 110 O  | O110  | 0.64970 | 0.94365 | 0.21660 |
| 111 Co | Co111 | 0.76389 | 0.66678 | 0.26587 |
| 112 Co | Co112 | 0.88850 | 0.83327 | 0.27169 |
| 113 H  | H113  | 0.73799 | 0.89039 | 0.38169 |
| 114 H  | H114  | 0.86021 | 0.72281 | 0.39687 |
| 115 H  | H115  | 0.78568 | 0.77699 | 0.18406 |
| 116 H  | H116  | 0.90879 | 0.94280 | 0.19660 |
| 117 O  | O117  | 0.74793 | 0.88975 | 0.33345 |
| 118 O  | O118  | 0.87125 | 0.72292 | 0.34874 |
| 119 O  | O119  | 0.77322 | 0.77704 | 0.23205 |
| 120 O  | O120  | 0.89590 | 0.94365 | 0.24455 |

**Co(OH)<sub>2</sub>-Low Spin**

|      |     | <i>x</i> | <i>y</i> | <i>z</i> |
|------|-----|----------|----------|----------|
| 1 Co | Co1 | 0.01511  | 0.00011  | 0.20057  |
| 2 Co | Co2 | 0.14012  | 0.16660  | 0.20078  |
| 3 H  | H3  | 0.01991  | 0.22372  | 0.30141  |
| 4 H  | H4  | 0.14410  | 0.05614  | 0.30130  |
| 5 H  | H5  | 0.01330  | 0.11032  | 0.10002  |
| 6 H  | H6  | 0.13819  | 0.27613  | 0.10000  |
| 7 O  | O7  | 0.01668  | 0.22308  | 0.25279  |
| 8 O  | O8  | 0.14199  | 0.05625  | 0.25267  |
| 9 O  | O9  | 0.01397  | 0.11037  | 0.14868  |

|       |      |         |         |         |
|-------|------|---------|---------|---------|
| 10 O  | O10  | 0.13843 | 0.27698 | 0.14866 |
| 11 Co | Co11 | 0.26511 | 0.00011 | 0.20057 |
| 12 Co | Co12 | 0.39012 | 0.16660 | 0.20078 |
| 13 H  | H13  | 0.26991 | 0.22372 | 0.30141 |
| 14 H  | H14  | 0.39410 | 0.05614 | 0.30130 |
| 15 H  | H15  | 0.26330 | 0.11032 | 0.10002 |
| 16 H  | H16  | 0.38819 | 0.27613 | 0.10000 |
| 17 O  | O17  | 0.26668 | 0.22308 | 0.25279 |
| 18 O  | O18  | 0.39199 | 0.05625 | 0.25267 |
| 19 O  | O19  | 0.26397 | 0.11037 | 0.14868 |
| 20 O  | O20  | 0.38843 | 0.27698 | 0.14866 |
| 21 Co | Co21 | 0.51511 | 0.00011 | 0.20057 |
| 22 Co | Co22 | 0.64012 | 0.16660 | 0.20078 |
| 23 H  | H23  | 0.51991 | 0.22372 | 0.30141 |
| 24 H  | H24  | 0.64410 | 0.05614 | 0.30130 |
| 25 H  | H25  | 0.51330 | 0.11032 | 0.10002 |
| 26 H  | H26  | 0.63819 | 0.27613 | 0.10000 |
| 27 O  | O27  | 0.51668 | 0.22308 | 0.25279 |
| 28 O  | O28  | 0.64199 | 0.05625 | 0.25267 |
| 29 O  | O29  | 0.51397 | 0.11037 | 0.14868 |
| 30 O  | O30  | 0.63843 | 0.27698 | 0.14866 |
| 31 Co | Co31 | 0.76511 | 0.00011 | 0.20057 |
| 32 Co | Co32 | 0.89012 | 0.16660 | 0.20078 |
| 33 H  | H33  | 0.76991 | 0.22372 | 0.30141 |
| 34 H  | H34  | 0.89410 | 0.05614 | 0.30130 |
| 35 H  | H35  | 0.76330 | 0.11032 | 0.10002 |

|       |      |         |         |         |
|-------|------|---------|---------|---------|
| 36 H  | H36  | 0.88819 | 0.27613 | 0.10000 |
| 37 O  | O37  | 0.76668 | 0.22308 | 0.25279 |
| 38 O  | O38  | 0.89199 | 0.05625 | 0.25267 |
| 39 O  | O39  | 0.76397 | 0.11037 | 0.14868 |
| 40 O  | O40  | 0.88843 | 0.27698 | 0.14866 |
| 41 Co | Co41 | 0.01511 | 0.33345 | 0.20057 |
| 42 Co | Co42 | 0.14012 | 0.49993 | 0.20078 |
| 43 H  | H43  | 0.01991 | 0.55705 | 0.30141 |
| 44 H  | H44  | 0.14410 | 0.38947 | 0.30130 |
| 45 H  | H45  | 0.01330 | 0.44366 | 0.10002 |
| 46 H  | H46  | 0.13819 | 0.60947 | 0.10000 |
| 47 O  | O47  | 0.01668 | 0.55642 | 0.25279 |
| 48 O  | O48  | 0.14199 | 0.38958 | 0.25267 |
| 49 O  | O49  | 0.01397 | 0.44371 | 0.14868 |
| 50 O  | O50  | 0.13843 | 0.61032 | 0.14866 |
| 51 Co | Co51 | 0.26511 | 0.33345 | 0.20057 |
| 52 Co | Co52 | 0.39012 | 0.49993 | 0.20078 |
| 53 H  | H53  | 0.26991 | 0.55705 | 0.30141 |
| 54 H  | H54  | 0.39410 | 0.38947 | 0.30130 |
| 55 H  | H55  | 0.26330 | 0.44366 | 0.10002 |
| 56 H  | H56  | 0.38819 | 0.60947 | 0.10000 |
| 57 O  | O57  | 0.26668 | 0.55642 | 0.25279 |
| 58 O  | O58  | 0.39199 | 0.38958 | 0.25267 |
| 59 O  | O59  | 0.26397 | 0.44371 | 0.14868 |
| 60 O  | O60  | 0.38843 | 0.61032 | 0.14866 |
| 61 Co | Co61 | 0.51511 | 0.33345 | 0.20057 |

|            |         |         |         |
|------------|---------|---------|---------|
| 62 Co Co62 | 0.64012 | 0.49993 | 0.20078 |
| 63 H H63   | 0.51991 | 0.55705 | 0.30141 |
| 64 H H64   | 0.64410 | 0.38947 | 0.30130 |
| 65 H H65   | 0.51330 | 0.44366 | 0.10002 |
| 66 H H66   | 0.63819 | 0.60947 | 0.10000 |
| 67 O O67   | 0.51668 | 0.55642 | 0.25279 |
| 68 O O68   | 0.64199 | 0.38958 | 0.25267 |
| 69 O O69   | 0.51397 | 0.44371 | 0.14868 |
| 70 O O70   | 0.63843 | 0.61032 | 0.14866 |
| 71 Co Co71 | 0.76511 | 0.33345 | 0.20057 |
| 72 Co Co72 | 0.89012 | 0.49993 | 0.20078 |
| 73 H H73   | 0.76991 | 0.55705 | 0.30141 |
| 74 H H74   | 0.89410 | 0.38947 | 0.30130 |
| 75 H H75   | 0.76330 | 0.44366 | 0.10002 |
| 76 H H76   | 0.88819 | 0.60947 | 0.10000 |
| 77 O O77   | 0.76668 | 0.55642 | 0.25279 |
| 78 O O78   | 0.89199 | 0.38958 | 0.25267 |
| 79 O O79   | 0.76397 | 0.44371 | 0.14868 |
| 80 O O80   | 0.88843 | 0.61032 | 0.14866 |
| 81 Co Co81 | 0.01511 | 0.66678 | 0.20057 |
| 82 Co Co82 | 0.14012 | 0.83327 | 0.20078 |
| 83 H H83   | 0.01991 | 0.89039 | 0.30141 |
| 84 H H84   | 0.14410 | 0.72281 | 0.30130 |
| 85 H H85   | 0.01330 | 0.77699 | 0.10002 |
| 86 H H86   | 0.13819 | 0.94280 | 0.10000 |
| 87 O O87   | 0.01668 | 0.88975 | 0.25279 |

|        |       |         |         |         |
|--------|-------|---------|---------|---------|
| 88 O   | O88   | 0.14199 | 0.72292 | 0.25267 |
| 89 O   | O89   | 0.01397 | 0.77704 | 0.14868 |
| 90 O   | O90   | 0.13843 | 0.94365 | 0.14866 |
| 91 Co  | Co91  | 0.26511 | 0.66678 | 0.20057 |
| 92 Co  | Co92  | 0.39012 | 0.83327 | 0.20078 |
| 93 H   | H93   | 0.26991 | 0.89039 | 0.30141 |
| 94 H   | H94   | 0.39410 | 0.72281 | 0.30130 |
| 95 H   | H95   | 0.26330 | 0.77699 | 0.10002 |
| 96 H   | H96   | 0.38819 | 0.94280 | 0.10000 |
| 97 O   | O97   | 0.26668 | 0.88975 | 0.25279 |
| 98 O   | O98   | 0.39199 | 0.72292 | 0.25267 |
| 99 O   | O99   | 0.26397 | 0.77704 | 0.14868 |
| 100 O  | O100  | 0.38843 | 0.94365 | 0.14866 |
| 101 Co | Co101 | 0.51511 | 0.66678 | 0.20057 |
| 102 Co | Co102 | 0.64012 | 0.83327 | 0.20078 |
| 103 H  | H103  | 0.51991 | 0.89039 | 0.30141 |
| 104 H  | H104  | 0.64410 | 0.72281 | 0.30130 |
| 105 H  | H105  | 0.51330 | 0.77699 | 0.10002 |
| 106 H  | H106  | 0.63819 | 0.94280 | 0.10000 |
| 107 O  | O107  | 0.51668 | 0.88975 | 0.25279 |
| 108 O  | O108  | 0.64199 | 0.72292 | 0.25267 |
| 109 O  | O109  | 0.51397 | 0.77704 | 0.14868 |
| 110 O  | O110  | 0.63843 | 0.94365 | 0.14866 |
| 111 Co | Co111 | 0.76511 | 0.66678 | 0.20057 |
| 112 Co | Co112 | 0.89012 | 0.83327 | 0.20078 |
| 113 H  | H113  | 0.76991 | 0.89039 | 0.30141 |

|     |   |      |         |         |         |
|-----|---|------|---------|---------|---------|
| 114 | H | H114 | 0.89410 | 0.72281 | 0.30130 |
| 115 | H | H115 | 0.76330 | 0.77699 | 0.10002 |
| 116 | H | H116 | 0.88819 | 0.94280 | 0.10000 |
| 117 | O | O117 | 0.76668 | 0.88975 | 0.25279 |
| 118 | O | O118 | 0.89199 | 0.72292 | 0.25267 |
| 119 | O | O119 | 0.76397 | 0.77704 | 0.14868 |
| 120 | O | O120 | 0.88843 | 0.94365 | 0.14866 |

**Co(OH)<sub>2</sub>-High Spin-\*H<sub>2</sub>O**

|    |    |      | <i>x</i> | <i>y</i> | <i>z</i> |
|----|----|------|----------|----------|----------|
| 1  | Co | Co1  | 0.02156  | 0.00011  | 0.29532  |
| 2  | Co | Co2  | 0.14012  | 0.16660  | 0.24790  |
| 3  | H  | H3   | 0.05365  | 0.22372  | 0.39548  |
| 4  | H  | H4   | 0.17575  | 0.05614  | 0.38006  |
| 5  | H  | H5   | -0.00734 | 0.11032  | 0.19643  |
| 6  | H  | H6   | 0.11581  | 0.27613  | 0.18386  |
| 7  | O  | O7   | 0.03736  | 0.22308  | 0.34796  |
| 8  | O  | O8   | 0.16055  | 0.05625  | 0.33241  |
| 9  | O  | O9   | 0.00644  | 0.11037  | 0.24427  |
| 10 | O  | O10  | 0.12917  | 0.27698  | 0.23175  |
| 11 | Co | Co11 | 0.26777  | 0.00011  | 0.26737  |
| 12 | Co | Co12 | 0.39012  | 0.16660  | 0.24790  |
| 13 | H  | H13  | 0.29985  | 0.22372  | 0.36752  |
| 14 | H  | H14  | 0.42195  | 0.05614  | 0.35211  |
| 15 | H  | H15  | 0.23886  | 0.11032  | 0.16847  |
| 16 | H  | H16  | 0.36201  | 0.27613  | 0.15591  |

|       |      |          |         |         |
|-------|------|----------|---------|---------|
| 17 O  | O17  | 0.28356  | 0.22308 | 0.32000 |
| 18 O  | O18  | 0.40676  | 0.05625 | 0.30445 |
| 19 O  | O19  | 0.25264  | 0.11037 | 0.21631 |
| 20 O  | O20  | 0.37537  | 0.27698 | 0.20380 |
| 21 Co | Co21 | 0.51397  | 0.00011 | 0.23941 |
| 22 Co | Co22 | 0.64012  | 0.16660 | 0.24790 |
| 23 H  | H23  | 0.66815  | 0.05614 | 0.32415 |
| 24 H  | H24  | 0.48506  | 0.11032 | 0.14052 |
| 25 H  | H25  | 0.60822  | 0.27613 | 0.12795 |
| 26 O  | O26  | 0.65296  | 0.05625 | 0.27650 |
| 27 O  | O27  | 0.49884  | 0.11037 | 0.18836 |
| 28 O  | O28  | 0.62158  | 0.27698 | 0.17585 |
| 29 Co | Co29 | 0.76017  | 0.00011 | 0.21146 |
| 30 Co | Co30 | 0.89012  | 0.16660 | 0.24790 |
| 31 H  | H31  | 0.79226  | 0.22372 | 0.31161 |
| 32 H  | H32  | 0.91435  | 0.05614 | 0.29620 |
| 33 H  | H33  | 0.73126  | 0.11032 | 0.11256 |
| 34 H  | H34  | 0.85442  | 0.27613 | 0.10000 |
| 35 O  | O35  | 0.77597  | 0.22308 | 0.26409 |
| 36 O  | O36  | 0.89916  | 0.05625 | 0.24854 |
| 37 O  | O37  | 0.74504  | 0.11037 | 0.16040 |
| 38 O  | O38  | 0.86778  | 0.27698 | 0.14789 |
| 39 Co | Co39 | 0.00997  | 0.33345 | 0.27373 |
| 40 Co | Co40 | 0.14012  | 0.49993 | 0.24790 |
| 41 H  | H41  | -0.00066 | 0.55705 | 0.29852 |
| 42 H  | H42  | 0.16953  | 0.38947 | 0.38337 |

|       |      |         |         |         |
|-------|------|---------|---------|---------|
| 43 H  | H43  | 0.00153 | 0.44366 | 0.17230 |
| 44 H  | H44  | 0.17013 | 0.60947 | 0.11343 |
| 45 O  | O45  | 0.00927 | 0.55642 | 0.25028 |
| 46 O  | O46  | 0.15434 | 0.38958 | 0.33571 |
| 47 O  | O47  | 0.00878 | 0.44371 | 0.22073 |
| 48 O  | O48  | 0.15725 | 0.61032 | 0.16138 |
| 49 Co | Co49 | 0.25902 | 0.33345 | 0.25970 |
| 50 Co | Co50 | 0.39012 | 0.49993 | 0.24790 |
| 51 H  | H51  | 0.24554 | 0.55705 | 0.32647 |
| 52 H  | H52  | 0.25058 | 0.44366 | 0.15827 |
| 53 H  | H53  | 0.41633 | 0.60947 | 0.14138 |
| 54 O  | O54  | 0.25548 | 0.55642 | 0.27823 |
| 55 O  | O55  | 0.25783 | 0.44371 | 0.20670 |
| 56 O  | O56  | 0.40345 | 0.61032 | 0.18933 |
| 57 Co | Co57 | 0.50807 | 0.33345 | 0.24567 |
| 58 Co | Co58 | 0.64012 | 0.49993 | 0.24790 |
| 59 H  | H59  | 0.49174 | 0.55705 | 0.35443 |
| 60 H  | H60  | 0.49963 | 0.44366 | 0.14423 |
| 61 H  | H61  | 0.66254 | 0.60947 | 0.16934 |
| 62 O  | O62  | 0.50168 | 0.55642 | 0.30618 |
| 63 O  | O63  | 0.50688 | 0.44371 | 0.19267 |
| 64 O  | O64  | 0.64965 | 0.61032 | 0.21728 |
| 65 Co | Co65 | 0.75712 | 0.33345 | 0.23164 |
| 66 Co | Co66 | 0.89012 | 0.49993 | 0.24790 |
| 67 H  | H67  | 0.73794 | 0.55705 | 0.38238 |
| 68 H  | H68  | 0.74868 | 0.44366 | 0.13020 |

|            |          |         |         |
|------------|----------|---------|---------|
| 69 H H69   | 0.90874  | 0.60947 | 0.19729 |
| 70 O O70   | 0.74788  | 0.55642 | 0.33414 |
| 71 O O71   | 0.75593  | 0.44371 | 0.17863 |
| 72 O O72   | 0.89585  | 0.61032 | 0.24524 |
| 73 Co Co73 | 0.01674  | 0.66678 | 0.22378 |
| 74 Co Co74 | 0.14135  | 0.83327 | 0.22960 |
| 75 H H75   | -0.00061 | 0.89039 | 0.29783 |
| 76 H H76   | 0.12161  | 0.72281 | 0.31301 |
| 77 H H77   | 0.04708  | 0.77699 | 0.10020 |
| 78 H H78   | 0.17018  | 0.94280 | 0.11274 |
| 79 O O79   | 0.00932  | 0.88975 | 0.24959 |
| 80 O O80   | 0.13264  | 0.72292 | 0.26488 |
| 81 O O81   | 0.03462  | 0.77704 | 0.14819 |
| 82 O O82   | 0.15730  | 0.94365 | 0.16069 |
| 83 Co Co83 | 0.26579  | 0.66678 | 0.23781 |
| 84 Co Co84 | 0.39040  | 0.83327 | 0.24363 |
| 85 H H85   | 0.24559  | 0.89039 | 0.32578 |
| 86 H H86   | 0.36781  | 0.72281 | 0.34096 |
| 87 H H87   | 0.29328  | 0.77699 | 0.12815 |
| 88 H H88   | 0.41638  | 0.94280 | 0.14070 |
| 89 O O89   | 0.25552  | 0.88975 | 0.27754 |
| 90 O O90   | 0.37885  | 0.72292 | 0.29283 |
| 91 O O91   | 0.28082  | 0.77704 | 0.17614 |
| 92 O O92   | 0.40350  | 0.94365 | 0.18864 |
| 93 Co Co93 | 0.51484  | 0.66678 | 0.25184 |
| 94 Co Co94 | 0.63945  | 0.83327 | 0.25766 |

|        |       |         |         |         |
|--------|-------|---------|---------|---------|
| 95 H   | H95   | 0.49179 | 0.89039 | 0.35374 |
| 96 H   | H96   | 0.61401 | 0.72281 | 0.36891 |
| 97 H   | H97   | 0.53948 | 0.77699 | 0.15611 |
| 98 H   | H98   | 0.66259 | 0.94280 | 0.16865 |
| 99 O   | O99   | 0.50173 | 0.88975 | 0.30550 |
| 100 O  | O100  | 0.62505 | 0.72292 | 0.32079 |
| 101 O  | O101  | 0.52702 | 0.77704 | 0.20410 |
| 102 O  | O102  | 0.64970 | 0.94365 | 0.21660 |
| 103 Co | Co103 | 0.76389 | 0.66678 | 0.26587 |
| 104 Co | Co104 | 0.88850 | 0.83327 | 0.27169 |
| 105 H  | H105  | 0.73799 | 0.89039 | 0.38169 |
| 106 H  | H106  | 0.86021 | 0.72281 | 0.39687 |
| 107 H  | H107  | 0.78568 | 0.77699 | 0.18406 |
| 108 H  | H108  | 0.90879 | 0.94280 | 0.19660 |
| 109 O  | O109  | 0.74793 | 0.88975 | 0.33345 |
| 110 O  | O110  | 0.87125 | 0.72292 | 0.34874 |
| 111 O  | O111  | 0.77322 | 0.77704 | 0.23205 |
| 112 O  | O112  | 0.89590 | 0.94365 | 0.24455 |
| 113 O  | O113  | 0.50272 | 0.32959 | 0.36676 |
| 114 H  | H114  | 0.51585 | 0.38222 | 0.39967 |
| 115 H  | H115  | 0.51922 | 0.27361 | 0.39498 |

**Co(OH)<sub>2</sub>-High Spin-\*OH**

|      |     | <i>x</i> | <i>y</i> | <i>z</i> |
|------|-----|----------|----------|----------|
| 1 Co | Co1 | 0.02156  | 0.00011  | 0.29532  |
| 2 Co | Co2 | 0.14012  | 0.16660  | 0.24790  |

|            |          |         |         |
|------------|----------|---------|---------|
| 3 H H3     | 0.05365  | 0.22372 | 0.39548 |
| 4 H H4     | 0.17575  | 0.05614 | 0.38006 |
| 5 H H5     | -0.00734 | 0.11032 | 0.19643 |
| 6 H H6     | 0.11581  | 0.27613 | 0.18386 |
| 7 O O7     | 0.03736  | 0.22308 | 0.34796 |
| 8 O O8     | 0.16055  | 0.05625 | 0.33241 |
| 9 O O9     | 0.00644  | 0.11037 | 0.24427 |
| 10 O O10   | 0.12917  | 0.27698 | 0.23175 |
| 11 Co Co11 | 0.26777  | 0.00011 | 0.26737 |
| 12 Co Co12 | 0.39012  | 0.16660 | 0.24790 |
| 13 H H13   | 0.29985  | 0.22372 | 0.36752 |
| 14 H H14   | 0.42195  | 0.05614 | 0.35211 |
| 15 H H15   | 0.23886  | 0.11032 | 0.16847 |
| 16 H H16   | 0.36201  | 0.27613 | 0.15591 |
| 17 O O17   | 0.28356  | 0.22308 | 0.32000 |
| 18 O O18   | 0.40676  | 0.05625 | 0.30445 |
| 19 O O19   | 0.25264  | 0.11037 | 0.21631 |
| 20 O O20   | 0.37537  | 0.27698 | 0.20380 |
| 21 Co Co21 | 0.51397  | 0.00011 | 0.23941 |
| 22 Co Co22 | 0.64012  | 0.16660 | 0.24790 |
| 23 H H23   | 0.66815  | 0.05614 | 0.32415 |
| 24 H H24   | 0.48506  | 0.11032 | 0.14052 |
| 25 H H25   | 0.60822  | 0.27613 | 0.12795 |
| 26 O O26   | 0.65296  | 0.05625 | 0.27650 |
| 27 O O27   | 0.49884  | 0.11037 | 0.18836 |
| 28 O O28   | 0.62158  | 0.27698 | 0.17585 |

|       |      |          |         |         |
|-------|------|----------|---------|---------|
| 29 Co | Co29 | 0.76017  | 0.00011 | 0.21146 |
| 30 Co | Co30 | 0.89012  | 0.16660 | 0.24790 |
| 31 H  | H31  | 0.79226  | 0.22372 | 0.31161 |
| 32 H  | H32  | 0.91435  | 0.05614 | 0.29620 |
| 33 H  | H33  | 0.73126  | 0.11032 | 0.11256 |
| 34 H  | H34  | 0.85442  | 0.27613 | 0.10000 |
| 35 O  | O35  | 0.77597  | 0.22308 | 0.26409 |
| 36 O  | O36  | 0.89916  | 0.05625 | 0.24854 |
| 37 O  | O37  | 0.74504  | 0.11037 | 0.16040 |
| 38 O  | O38  | 0.86778  | 0.27698 | 0.14789 |
| 39 Co | Co39 | 0.00997  | 0.33345 | 0.27373 |
| 40 Co | Co40 | 0.14012  | 0.49993 | 0.24790 |
| 41 H  | H41  | -0.00066 | 0.55705 | 0.29852 |
| 42 H  | H42  | 0.16953  | 0.38947 | 0.38337 |
| 43 H  | H43  | 0.00153  | 0.44366 | 0.17230 |
| 44 H  | H44  | 0.17013  | 0.60947 | 0.11343 |
| 45 O  | O45  | 0.00927  | 0.55642 | 0.25028 |
| 46 O  | O46  | 0.15434  | 0.38958 | 0.33571 |
| 47 O  | O47  | 0.00878  | 0.44371 | 0.22073 |
| 48 O  | O48  | 0.15725  | 0.61032 | 0.16138 |
| 49 Co | Co49 | 0.25902  | 0.33345 | 0.25970 |
| 50 Co | Co50 | 0.39012  | 0.49993 | 0.24790 |
| 51 H  | H51  | 0.24554  | 0.55705 | 0.32647 |
| 52 H  | H52  | 0.25058  | 0.44366 | 0.15827 |
| 53 H  | H53  | 0.41633  | 0.60947 | 0.14138 |
| 54 O  | O54  | 0.25548  | 0.55642 | 0.27823 |

|            |          |         |         |
|------------|----------|---------|---------|
| 55 O O55   | 0.25783  | 0.44371 | 0.20670 |
| 56 O O56   | 0.40345  | 0.61032 | 0.18933 |
| 57 Co Co57 | 0.50807  | 0.33345 | 0.24567 |
| 58 Co Co58 | 0.64012  | 0.49993 | 0.24790 |
| 59 H H59   | 0.49174  | 0.55705 | 0.35443 |
| 60 H H60   | 0.49963  | 0.44366 | 0.14423 |
| 61 H H61   | 0.66254  | 0.60947 | 0.16934 |
| 62 O O62   | 0.50168  | 0.55642 | 0.30618 |
| 63 O O63   | 0.50688  | 0.44371 | 0.19267 |
| 64 O O64   | 0.64965  | 0.61032 | 0.21728 |
| 65 Co Co65 | 0.75712  | 0.33345 | 0.23164 |
| 66 Co Co66 | 0.89012  | 0.49993 | 0.24790 |
| 67 H H67   | 0.73794  | 0.55705 | 0.38238 |
| 68 H H68   | 0.74868  | 0.44366 | 0.13020 |
| 69 H H69   | 0.90874  | 0.60947 | 0.19729 |
| 70 O O70   | 0.74788  | 0.55642 | 0.33414 |
| 71 O O71   | 0.75593  | 0.44371 | 0.17863 |
| 72 O O72   | 0.89585  | 0.61032 | 0.24524 |
| 73 Co Co73 | 0.01674  | 0.66678 | 0.22378 |
| 74 Co Co74 | 0.14135  | 0.83327 | 0.22960 |
| 75 H H75   | -0.00061 | 0.89039 | 0.29783 |
| 76 H H76   | 0.12161  | 0.72281 | 0.31301 |
| 77 H H77   | 0.04708  | 0.77699 | 0.10020 |
| 78 H H78   | 0.17018  | 0.94280 | 0.11274 |
| 79 O O79   | 0.00932  | 0.88975 | 0.24959 |
| 80 O O80   | 0.13264  | 0.72292 | 0.26488 |

|              |         |         |         |
|--------------|---------|---------|---------|
| 81 O O81     | 0.03462 | 0.77704 | 0.14819 |
| 82 O O82     | 0.15730 | 0.94365 | 0.16069 |
| 83 Co Co83   | 0.26579 | 0.66678 | 0.23781 |
| 84 Co Co84   | 0.39040 | 0.83327 | 0.24363 |
| 85 H H85     | 0.24559 | 0.89039 | 0.32578 |
| 86 H H86     | 0.36781 | 0.72281 | 0.34096 |
| 87 H H87     | 0.29328 | 0.77699 | 0.12815 |
| 88 H H88     | 0.41638 | 0.94280 | 0.14070 |
| 89 O O89     | 0.25552 | 0.88975 | 0.27754 |
| 90 O O90     | 0.37885 | 0.72292 | 0.29283 |
| 91 O O91     | 0.28082 | 0.77704 | 0.17614 |
| 92 O O92     | 0.40350 | 0.94365 | 0.18864 |
| 93 Co Co93   | 0.51484 | 0.66678 | 0.25184 |
| 94 Co Co94   | 0.63945 | 0.83327 | 0.25766 |
| 95 H H95     | 0.49179 | 0.89039 | 0.35374 |
| 96 H H96     | 0.61401 | 0.72281 | 0.36891 |
| 97 H H97     | 0.53948 | 0.77699 | 0.15611 |
| 98 H H98     | 0.66259 | 0.94280 | 0.16865 |
| 99 O O99     | 0.50173 | 0.88975 | 0.30550 |
| 100 O O100   | 0.62505 | 0.72292 | 0.32079 |
| 101 O O101   | 0.52702 | 0.77704 | 0.20410 |
| 102 O O102   | 0.64970 | 0.94365 | 0.21660 |
| 103 Co Co103 | 0.76389 | 0.66678 | 0.26587 |
| 104 Co Co104 | 0.88850 | 0.83327 | 0.27169 |
| 105 H H105   | 0.73799 | 0.89039 | 0.38169 |
| 106 H H106   | 0.86021 | 0.72281 | 0.39687 |

|     |   |      |         |         |         |
|-----|---|------|---------|---------|---------|
| 107 | H | H107 | 0.78568 | 0.77699 | 0.18406 |
| 108 | H | H108 | 0.90879 | 0.94280 | 0.19660 |
| 109 | O | O109 | 0.74793 | 0.88975 | 0.33345 |
| 110 | O | O110 | 0.87125 | 0.72292 | 0.34874 |
| 111 | O | O111 | 0.77322 | 0.77704 | 0.23205 |
| 112 | O | O112 | 0.89590 | 0.94365 | 0.24455 |
| 113 | O | O113 | 0.50674 | 0.33682 | 0.32833 |
| 114 | H | H114 | 0.49327 | 0.36661 | 0.37723 |

**Co(OH)<sub>2</sub>-High Spin-\*O**

|    |    |      | x        | y       | z       |
|----|----|------|----------|---------|---------|
| 1  | Co | Co1  | 0.02156  | 0.00011 | 0.29532 |
| 2  | Co | Co2  | 0.14012  | 0.16660 | 0.24790 |
| 3  | H  | H3   | 0.05365  | 0.22372 | 0.39548 |
| 4  | H  | H4   | 0.17575  | 0.05614 | 0.38006 |
| 5  | H  | H5   | -0.00734 | 0.11032 | 0.19643 |
| 6  | H  | H6   | 0.11581  | 0.27613 | 0.18386 |
| 7  | O  | O7   | 0.03736  | 0.22308 | 0.34796 |
| 8  | O  | O8   | 0.16055  | 0.05625 | 0.33241 |
| 9  | O  | O9   | 0.00644  | 0.11037 | 0.24427 |
| 10 | O  | O10  | 0.12917  | 0.27698 | 0.23175 |
| 11 | Co | Co11 | 0.26777  | 0.00011 | 0.26737 |
| 12 | Co | Co12 | 0.39012  | 0.16660 | 0.24790 |
| 13 | H  | H13  | 0.29985  | 0.22372 | 0.36752 |
| 14 | H  | H14  | 0.42195  | 0.05614 | 0.35211 |
| 15 | H  | H15  | 0.23886  | 0.11032 | 0.16847 |

|       |      |          |         |         |
|-------|------|----------|---------|---------|
| 16 H  | H16  | 0.36201  | 0.27613 | 0.15591 |
| 17 O  | O17  | 0.28356  | 0.22308 | 0.32000 |
| 18 O  | O18  | 0.40676  | 0.05625 | 0.30445 |
| 19 O  | O19  | 0.25264  | 0.11037 | 0.21631 |
| 20 O  | O20  | 0.37537  | 0.27698 | 0.20380 |
| 21 Co | Co21 | 0.51397  | 0.00011 | 0.23941 |
| 22 Co | Co22 | 0.64012  | 0.16660 | 0.24790 |
| 23 H  | H23  | 0.66815  | 0.05614 | 0.32415 |
| 24 H  | H24  | 0.48506  | 0.11032 | 0.14052 |
| 25 H  | H25  | 0.60822  | 0.27613 | 0.12795 |
| 26 O  | O26  | 0.65296  | 0.05625 | 0.27650 |
| 27 O  | O27  | 0.49884  | 0.11037 | 0.18836 |
| 28 O  | O28  | 0.62158  | 0.27698 | 0.17585 |
| 29 Co | Co29 | 0.76017  | 0.00011 | 0.21146 |
| 30 Co | Co30 | 0.89012  | 0.16660 | 0.24790 |
| 31 H  | H31  | 0.79226  | 0.22372 | 0.31161 |
| 32 H  | H32  | 0.91435  | 0.05614 | 0.29620 |
| 33 H  | H33  | 0.73126  | 0.11032 | 0.11256 |
| 34 H  | H34  | 0.85442  | 0.27613 | 0.10000 |
| 35 O  | O35  | 0.77597  | 0.22308 | 0.26409 |
| 36 O  | O36  | 0.89916  | 0.05625 | 0.24854 |
| 37 O  | O37  | 0.74504  | 0.11037 | 0.16040 |
| 38 O  | O38  | 0.86778  | 0.27698 | 0.14789 |
| 39 Co | Co39 | 0.00997  | 0.33345 | 0.27373 |
| 40 Co | Co40 | 0.14012  | 0.49993 | 0.24790 |
| 41 H  | H41  | -0.00066 | 0.55705 | 0.29852 |

|       |      |         |         |         |
|-------|------|---------|---------|---------|
| 42 H  | H42  | 0.16953 | 0.38947 | 0.38337 |
| 43 H  | H43  | 0.00153 | 0.44366 | 0.17230 |
| 44 H  | H44  | 0.17013 | 0.60947 | 0.11343 |
| 45 O  | O45  | 0.00927 | 0.55642 | 0.25028 |
| 46 O  | O46  | 0.15434 | 0.38958 | 0.33571 |
| 47 O  | O47  | 0.00878 | 0.44371 | 0.22073 |
| 48 O  | O48  | 0.15725 | 0.61032 | 0.16138 |
| 49 Co | Co49 | 0.25902 | 0.33345 | 0.25970 |
| 50 Co | Co50 | 0.39012 | 0.49993 | 0.24790 |
| 51 H  | H51  | 0.24554 | 0.55705 | 0.32647 |
| 52 H  | H52  | 0.25058 | 0.44366 | 0.15827 |
| 53 H  | H53  | 0.41633 | 0.60947 | 0.14138 |
| 54 O  | O54  | 0.25548 | 0.55642 | 0.27823 |
| 55 O  | O55  | 0.25783 | 0.44371 | 0.20670 |
| 56 O  | O56  | 0.40345 | 0.61032 | 0.18933 |
| 57 Co | Co57 | 0.50807 | 0.33345 | 0.24567 |
| 58 Co | Co58 | 0.64012 | 0.49993 | 0.24790 |
| 59 H  | H59  | 0.49174 | 0.55705 | 0.35443 |
| 60 H  | H60  | 0.49963 | 0.44366 | 0.14423 |
| 61 H  | H61  | 0.66254 | 0.60947 | 0.16934 |
| 62 O  | O62  | 0.50168 | 0.55642 | 0.30618 |
| 63 O  | O63  | 0.50688 | 0.44371 | 0.19267 |
| 64 O  | O64  | 0.64965 | 0.61032 | 0.21728 |
| 65 Co | Co65 | 0.75712 | 0.33345 | 0.23164 |
| 66 Co | Co66 | 0.89012 | 0.49993 | 0.24790 |
| 67 H  | H67  | 0.73794 | 0.55705 | 0.38238 |

|            |          |         |         |
|------------|----------|---------|---------|
| 68 H H68   | 0.74868  | 0.44366 | 0.13020 |
| 69 H H69   | 0.90874  | 0.60947 | 0.19729 |
| 70 O O70   | 0.74788  | 0.55642 | 0.33414 |
| 71 O O71   | 0.75593  | 0.44371 | 0.17863 |
| 72 O O72   | 0.89585  | 0.61032 | 0.24524 |
| 73 Co Co73 | 0.01674  | 0.66678 | 0.22378 |
| 74 Co Co74 | 0.14135  | 0.83327 | 0.22960 |
| 75 H H75   | -0.00061 | 0.89039 | 0.29783 |
| 76 H H76   | 0.12161  | 0.72281 | 0.31301 |
| 77 H H77   | 0.04708  | 0.77699 | 0.10020 |
| 78 H H78   | 0.17018  | 0.94280 | 0.11274 |
| 79 O O79   | 0.00932  | 0.88975 | 0.24959 |
| 80 O O80   | 0.13264  | 0.72292 | 0.26488 |
| 81 O O81   | 0.03462  | 0.77704 | 0.14819 |
| 82 O O82   | 0.15730  | 0.94365 | 0.16069 |
| 83 Co Co83 | 0.26579  | 0.66678 | 0.23781 |
| 84 Co Co84 | 0.39040  | 0.83327 | 0.24363 |
| 85 H H85   | 0.24559  | 0.89039 | 0.32578 |
| 86 H H86   | 0.36781  | 0.72281 | 0.34096 |
| 87 H H87   | 0.29328  | 0.77699 | 0.12815 |
| 88 H H88   | 0.41638  | 0.94280 | 0.14070 |
| 89 O O89   | 0.25552  | 0.88975 | 0.27754 |
| 90 O O90   | 0.37885  | 0.72292 | 0.29283 |
| 91 O O91   | 0.28082  | 0.77704 | 0.17614 |
| 92 O O92   | 0.40350  | 0.94365 | 0.18864 |
| 93 Co Co93 | 0.51484  | 0.66678 | 0.25184 |

|              |         |         |         |
|--------------|---------|---------|---------|
| 94 Co Co94   | 0.63945 | 0.83327 | 0.25766 |
| 95 H H95     | 0.49179 | 0.89039 | 0.35374 |
| 96 H H96     | 0.61401 | 0.72281 | 0.36891 |
| 97 H H97     | 0.53948 | 0.77699 | 0.15611 |
| 98 H H98     | 0.66259 | 0.94280 | 0.16865 |
| 99 O O99     | 0.50173 | 0.88975 | 0.30550 |
| 100 O O100   | 0.62505 | 0.72292 | 0.32079 |
| 101 O O101   | 0.52702 | 0.77704 | 0.20410 |
| 102 O O102   | 0.64970 | 0.94365 | 0.21660 |
| 103 Co Co103 | 0.76389 | 0.66678 | 0.26587 |
| 104 Co Co104 | 0.88850 | 0.83327 | 0.27169 |
| 105 H H105   | 0.73799 | 0.89039 | 0.38169 |
| 106 H H106   | 0.86021 | 0.72281 | 0.39687 |
| 107 H H107   | 0.78568 | 0.77699 | 0.18406 |
| 108 H H108   | 0.90879 | 0.94280 | 0.19660 |
| 109 O O109   | 0.74793 | 0.88975 | 0.33345 |
| 110 O O110   | 0.87125 | 0.72292 | 0.34874 |
| 111 O O111   | 0.77322 | 0.77704 | 0.23205 |
| 112 O O112   | 0.89590 | 0.94365 | 0.24455 |
| 113 O O113   | 0.50674 | 0.33682 | 0.32833 |

**Co(OH)<sub>2</sub>-High Spin-\*OOH**

|          | <i>x</i> | <i>y</i> | <i>z</i> |
|----------|----------|----------|----------|
| 1 Co Co1 | 0.02156  | 0.00011  | 0.29532  |
| 2 Co Co2 | 0.14012  | 0.16660  | 0.24790  |
| 3 H H3   | 0.05365  | 0.22372  | 0.39548  |

|            |          |         |         |
|------------|----------|---------|---------|
| 4 H H4     | 0.17575  | 0.05614 | 0.38006 |
| 5 H H5     | -0.00734 | 0.11032 | 0.19643 |
| 6 H H6     | 0.11581  | 0.27613 | 0.18386 |
| 7 O O7     | 0.03736  | 0.22308 | 0.34796 |
| 8 O O8     | 0.16055  | 0.05625 | 0.33241 |
| 9 O O9     | 0.00644  | 0.11037 | 0.24427 |
| 10 O O10   | 0.12917  | 0.27698 | 0.23175 |
| 11 Co Co11 | 0.26777  | 0.00011 | 0.26737 |
| 12 Co Co12 | 0.39012  | 0.16660 | 0.24790 |
| 13 H H13   | 0.29985  | 0.22372 | 0.36752 |
| 14 H H14   | 0.42195  | 0.05614 | 0.35211 |
| 15 H H15   | 0.23886  | 0.11032 | 0.16847 |
| 16 H H16   | 0.36201  | 0.27613 | 0.15591 |
| 17 O O17   | 0.28356  | 0.22308 | 0.32000 |
| 18 O O18   | 0.40676  | 0.05625 | 0.30445 |
| 19 O O19   | 0.25264  | 0.11037 | 0.21631 |
| 20 O O20   | 0.37537  | 0.27698 | 0.20380 |
| 21 Co Co21 | 0.51397  | 0.00011 | 0.23941 |
| 22 Co Co22 | 0.64012  | 0.16660 | 0.24790 |
| 23 H H23   | 0.66815  | 0.05614 | 0.32415 |
| 24 H H24   | 0.48506  | 0.11032 | 0.14052 |
| 25 H H25   | 0.60822  | 0.27613 | 0.12795 |
| 26 O O26   | 0.65296  | 0.05625 | 0.27650 |
| 27 O O27   | 0.49884  | 0.11037 | 0.18836 |
| 28 O O28   | 0.62158  | 0.27698 | 0.17585 |
| 29 Co Co29 | 0.76017  | 0.00011 | 0.21146 |

|            |          |         |         |
|------------|----------|---------|---------|
| 30 Co Co30 | 0.89012  | 0.16660 | 0.24790 |
| 31 H H31   | 0.79226  | 0.22372 | 0.31161 |
| 32 H H32   | 0.91435  | 0.05614 | 0.29620 |
| 33 H H33   | 0.73126  | 0.11032 | 0.11256 |
| 34 H H34   | 0.85442  | 0.27613 | 0.10000 |
| 35 O O35   | 0.77597  | 0.22308 | 0.26409 |
| 36 O O36   | 0.89916  | 0.05625 | 0.24854 |
| 37 O O37   | 0.74504  | 0.11037 | 0.16040 |
| 38 O O38   | 0.86778  | 0.27698 | 0.14789 |
| 39 Co Co39 | 0.00997  | 0.33345 | 0.27373 |
| 40 Co Co40 | 0.14012  | 0.49993 | 0.24790 |
| 41 H H41   | -0.00066 | 0.55705 | 0.29852 |
| 42 H H42   | 0.16953  | 0.38947 | 0.38337 |
| 43 H H43   | 0.00153  | 0.44366 | 0.17230 |
| 44 H H44   | 0.17013  | 0.60947 | 0.11343 |
| 45 O O45   | 0.00927  | 0.55642 | 0.25028 |
| 46 O O46   | 0.15434  | 0.38958 | 0.33571 |
| 47 O O47   | 0.00878  | 0.44371 | 0.22073 |
| 48 O O48   | 0.15725  | 0.61032 | 0.16138 |
| 49 Co Co49 | 0.25902  | 0.33345 | 0.25970 |
| 50 Co Co50 | 0.39012  | 0.49993 | 0.24790 |
| 51 H H51   | 0.24554  | 0.55705 | 0.32647 |
| 52 H H52   | 0.25058  | 0.44366 | 0.15827 |
| 53 H H53   | 0.41633  | 0.60947 | 0.14138 |
| 54 O O54   | 0.25548  | 0.55642 | 0.27823 |
| 55 O O55   | 0.25783  | 0.44371 | 0.20670 |

|            |          |         |         |
|------------|----------|---------|---------|
| 56 O O56   | 0.40345  | 0.61032 | 0.18933 |
| 57 Co Co57 | 0.50807  | 0.33345 | 0.24567 |
| 58 Co Co58 | 0.64012  | 0.49993 | 0.24790 |
| 59 H H59   | 0.49174  | 0.55705 | 0.35443 |
| 60 H H60   | 0.49963  | 0.44366 | 0.14423 |
| 61 H H61   | 0.66254  | 0.60947 | 0.16934 |
| 62 O O62   | 0.50168  | 0.55642 | 0.30618 |
| 63 O O63   | 0.50688  | 0.44371 | 0.19267 |
| 64 O O64   | 0.64965  | 0.61032 | 0.21728 |
| 65 Co Co65 | 0.75712  | 0.33345 | 0.23164 |
| 66 Co Co66 | 0.89012  | 0.49993 | 0.24790 |
| 67 H H67   | 0.73794  | 0.55705 | 0.38238 |
| 68 H H68   | 0.74868  | 0.44366 | 0.13020 |
| 69 H H69   | 0.90874  | 0.60947 | 0.19729 |
| 70 O O70   | 0.74788  | 0.55642 | 0.33414 |
| 71 O O71   | 0.75593  | 0.44371 | 0.17863 |
| 72 O O72   | 0.89585  | 0.61032 | 0.24524 |
| 73 Co Co73 | 0.01674  | 0.66678 | 0.22378 |
| 74 Co Co74 | 0.14135  | 0.83327 | 0.22960 |
| 75 H H75   | -0.00061 | 0.89039 | 0.29783 |
| 76 H H76   | 0.12161  | 0.72281 | 0.31301 |
| 77 H H77   | 0.04708  | 0.77699 | 0.10020 |
| 78 H H78   | 0.17018  | 0.94280 | 0.11274 |
| 79 O O79   | 0.00932  | 0.88975 | 0.24959 |
| 80 O O80   | 0.13264  | 0.72292 | 0.26488 |
| 81 O O81   | 0.03462  | 0.77704 | 0.14819 |

|              |         |         |         |
|--------------|---------|---------|---------|
| 82 O O82     | 0.15730 | 0.94365 | 0.16069 |
| 83 Co Co83   | 0.26579 | 0.66678 | 0.23781 |
| 84 Co Co84   | 0.39040 | 0.83327 | 0.24363 |
| 85 H H85     | 0.24559 | 0.89039 | 0.32578 |
| 86 H H86     | 0.36781 | 0.72281 | 0.34096 |
| 87 H H87     | 0.29328 | 0.77699 | 0.12815 |
| 88 H H88     | 0.41638 | 0.94280 | 0.14070 |
| 89 O O89     | 0.25552 | 0.88975 | 0.27754 |
| 90 O O90     | 0.37885 | 0.72292 | 0.29283 |
| 91 O O91     | 0.28082 | 0.77704 | 0.17614 |
| 92 O O92     | 0.40350 | 0.94365 | 0.18864 |
| 93 Co Co93   | 0.51484 | 0.66678 | 0.25184 |
| 94 Co Co94   | 0.63945 | 0.83327 | 0.25766 |
| 95 H H95     | 0.49179 | 0.89039 | 0.35374 |
| 96 H H96     | 0.61401 | 0.72281 | 0.36891 |
| 97 H H97     | 0.53948 | 0.77699 | 0.15611 |
| 98 H H98     | 0.66259 | 0.94280 | 0.16865 |
| 99 O O99     | 0.50173 | 0.88975 | 0.30550 |
| 100 O O100   | 0.62505 | 0.72292 | 0.32079 |
| 101 O O101   | 0.52702 | 0.77704 | 0.20410 |
| 102 O O102   | 0.64970 | 0.94365 | 0.21660 |
| 103 Co Co103 | 0.76389 | 0.66678 | 0.26587 |
| 104 Co Co104 | 0.88850 | 0.83327 | 0.27169 |
| 105 H H105   | 0.73799 | 0.89039 | 0.38169 |
| 106 H H106   | 0.86021 | 0.72281 | 0.39687 |
| 107 H H107   | 0.78568 | 0.77699 | 0.18406 |

|     |   |      |         |         |         |
|-----|---|------|---------|---------|---------|
| 108 | H | H108 | 0.90879 | 0.94280 | 0.19660 |
| 109 | O | O109 | 0.74793 | 0.88975 | 0.33345 |
| 110 | O | O110 | 0.87125 | 0.72292 | 0.34874 |
| 111 | O | O111 | 0.77322 | 0.77704 | 0.23205 |
| 112 | O | O112 | 0.89590 | 0.94365 | 0.24455 |
| 113 | O | O113 | 0.50674 | 0.33682 | 0.32833 |
| 114 | O | O114 | 0.51230 | 0.30906 | 0.39854 |
| 115 | H | H115 | 0.50360 | 0.34498 | 0.44495 |

**Co(OH)<sub>2</sub>-High Spin-\*O<sub>2</sub>**

|    |    |      | <i>x</i> | <i>y</i> | <i>z</i> |
|----|----|------|----------|----------|----------|
| 1  | Co | Co1  | 0.02156  | 0.00011  | 0.29532  |
| 2  | Co | Co2  | 0.14012  | 0.16660  | 0.24790  |
| 3  | H  | H3   | 0.05365  | 0.22372  | 0.39548  |
| 4  | H  | H4   | 0.17575  | 0.05614  | 0.38006  |
| 5  | H  | H5   | -0.00734 | 0.11032  | 0.19643  |
| 6  | H  | H6   | 0.11581  | 0.27613  | 0.18386  |
| 7  | O  | O7   | 0.03736  | 0.22308  | 0.34796  |
| 8  | O  | O8   | 0.16055  | 0.05625  | 0.33241  |
| 9  | O  | O9   | 0.00644  | 0.11037  | 0.24427  |
| 10 | O  | O10  | 0.12917  | 0.27698  | 0.23175  |
| 11 | Co | Co11 | 0.26777  | 0.00011  | 0.26737  |
| 12 | Co | Co12 | 0.39012  | 0.16660  | 0.24790  |
| 13 | H  | H13  | 0.29985  | 0.22372  | 0.36752  |
| 14 | H  | H14  | 0.42195  | 0.05614  | 0.35211  |
| 15 | H  | H15  | 0.23886  | 0.11032  | 0.16847  |

|       |      |          |         |         |
|-------|------|----------|---------|---------|
| 16 H  | H16  | 0.36201  | 0.27613 | 0.15591 |
| 17 O  | O17  | 0.28356  | 0.22308 | 0.32000 |
| 18 O  | O18  | 0.40676  | 0.05625 | 0.30445 |
| 19 O  | O19  | 0.25264  | 0.11037 | 0.21631 |
| 20 O  | O20  | 0.37537  | 0.27698 | 0.20380 |
| 21 Co | Co21 | 0.51397  | 0.00011 | 0.23941 |
| 22 Co | Co22 | 0.64012  | 0.16660 | 0.24790 |
| 23 H  | H23  | 0.66815  | 0.05614 | 0.32415 |
| 24 H  | H24  | 0.48506  | 0.11032 | 0.14052 |
| 25 H  | H25  | 0.60822  | 0.27613 | 0.12795 |
| 26 O  | O26  | 0.65296  | 0.05625 | 0.27650 |
| 27 O  | O27  | 0.49884  | 0.11037 | 0.18836 |
| 28 O  | O28  | 0.62158  | 0.27698 | 0.17585 |
| 29 Co | Co29 | 0.76017  | 0.00011 | 0.21146 |
| 30 Co | Co30 | 0.89012  | 0.16660 | 0.24790 |
| 31 H  | H31  | 0.79226  | 0.22372 | 0.31161 |
| 32 H  | H32  | 0.91435  | 0.05614 | 0.29620 |
| 33 H  | H33  | 0.73126  | 0.11032 | 0.11256 |
| 34 H  | H34  | 0.85442  | 0.27613 | 0.10000 |
| 35 O  | O35  | 0.77597  | 0.22308 | 0.26409 |
| 36 O  | O36  | 0.89916  | 0.05625 | 0.24854 |
| 37 O  | O37  | 0.74504  | 0.11037 | 0.16040 |
| 38 O  | O38  | 0.86778  | 0.27698 | 0.14789 |
| 39 Co | Co39 | 0.00997  | 0.33345 | 0.27373 |
| 40 Co | Co40 | 0.14012  | 0.49993 | 0.24790 |
| 41 H  | H41  | -0.00066 | 0.55705 | 0.29852 |

|       |      |         |         |         |
|-------|------|---------|---------|---------|
| 42 H  | H42  | 0.16953 | 0.38947 | 0.38337 |
| 43 H  | H43  | 0.00153 | 0.44366 | 0.17230 |
| 44 H  | H44  | 0.17013 | 0.60947 | 0.11343 |
| 45 O  | O45  | 0.00927 | 0.55642 | 0.25028 |
| 46 O  | O46  | 0.15434 | 0.38958 | 0.33571 |
| 47 O  | O47  | 0.00878 | 0.44371 | 0.22073 |
| 48 O  | O48  | 0.15725 | 0.61032 | 0.16138 |
| 49 Co | Co49 | 0.25902 | 0.33345 | 0.25970 |
| 50 Co | Co50 | 0.39012 | 0.49993 | 0.24790 |
| 51 H  | H51  | 0.24554 | 0.55705 | 0.32647 |
| 52 H  | H52  | 0.25058 | 0.44366 | 0.15827 |
| 53 H  | H53  | 0.41633 | 0.60947 | 0.14138 |
| 54 O  | O54  | 0.25548 | 0.55642 | 0.27823 |
| 55 O  | O55  | 0.25783 | 0.44371 | 0.20670 |
| 56 O  | O56  | 0.40345 | 0.61032 | 0.18933 |
| 57 Co | Co57 | 0.50807 | 0.33345 | 0.24567 |
| 58 Co | Co58 | 0.64012 | 0.49993 | 0.24790 |
| 59 H  | H59  | 0.49174 | 0.55705 | 0.35443 |
| 60 H  | H60  | 0.49963 | 0.44366 | 0.14423 |
| 61 H  | H61  | 0.66254 | 0.60947 | 0.16934 |
| 62 O  | O62  | 0.50168 | 0.55642 | 0.30618 |
| 63 O  | O63  | 0.50688 | 0.44371 | 0.19267 |
| 64 O  | O64  | 0.64965 | 0.61032 | 0.21728 |
| 65 Co | Co65 | 0.75712 | 0.33345 | 0.23164 |
| 66 Co | Co66 | 0.89012 | 0.49993 | 0.24790 |
| 67 H  | H67  | 0.73794 | 0.55705 | 0.38238 |

|       |      |          |         |         |
|-------|------|----------|---------|---------|
| 68 H  | H68  | 0.74868  | 0.44366 | 0.13020 |
| 69 H  | H69  | 0.90874  | 0.60947 | 0.19729 |
| 70 O  | O70  | 0.74788  | 0.55642 | 0.33414 |
| 71 O  | O71  | 0.75593  | 0.44371 | 0.17863 |
| 72 O  | O72  | 0.89585  | 0.61032 | 0.24524 |
| 73 Co | Co73 | 0.01674  | 0.66678 | 0.22378 |
| 74 Co | Co74 | 0.14135  | 0.83327 | 0.22960 |
| 75 H  | H75  | -0.00061 | 0.89039 | 0.29783 |
| 76 H  | H76  | 0.12161  | 0.72281 | 0.31301 |
| 77 H  | H77  | 0.04708  | 0.77699 | 0.10020 |
| 78 H  | H78  | 0.17018  | 0.94280 | 0.11274 |
| 79 O  | O79  | 0.00932  | 0.88975 | 0.24959 |
| 80 O  | O80  | 0.13264  | 0.72292 | 0.26488 |
| 81 O  | O81  | 0.03462  | 0.77704 | 0.14819 |
| 82 O  | O82  | 0.15730  | 0.94365 | 0.16069 |
| 83 Co | Co83 | 0.26579  | 0.66678 | 0.23781 |
| 84 Co | Co84 | 0.39040  | 0.83327 | 0.24363 |
| 85 H  | H85  | 0.24559  | 0.89039 | 0.32578 |
| 86 H  | H86  | 0.36781  | 0.72281 | 0.34096 |
| 87 H  | H87  | 0.29328  | 0.77699 | 0.12815 |
| 88 H  | H88  | 0.41638  | 0.94280 | 0.14070 |
| 89 O  | O89  | 0.25552  | 0.88975 | 0.27754 |
| 90 O  | O90  | 0.37885  | 0.72292 | 0.29283 |
| 91 O  | O91  | 0.28082  | 0.77704 | 0.17614 |
| 92 O  | O92  | 0.40350  | 0.94365 | 0.18864 |
| 93 Co | Co93 | 0.51484  | 0.66678 | 0.25184 |

|        |       |         |         |         |
|--------|-------|---------|---------|---------|
| 94 Co  | Co94  | 0.63945 | 0.83327 | 0.25766 |
| 95 H   | H95   | 0.49179 | 0.89039 | 0.35374 |
| 96 H   | H96   | 0.61401 | 0.72281 | 0.36891 |
| 97 H   | H97   | 0.53948 | 0.77699 | 0.15611 |
| 98 H   | H98   | 0.66259 | 0.94280 | 0.16865 |
| 99 O   | O99   | 0.50173 | 0.88975 | 0.30550 |
| 100 O  | O100  | 0.62505 | 0.72292 | 0.32079 |
| 101 O  | O101  | 0.52702 | 0.77704 | 0.20410 |
| 102 O  | O102  | 0.64970 | 0.94365 | 0.21660 |
| 103 Co | Co103 | 0.76389 | 0.66678 | 0.26587 |
| 104 Co | Co104 | 0.88850 | 0.83327 | 0.27169 |
| 105 H  | H105  | 0.73799 | 0.89039 | 0.38169 |
| 106 H  | H106  | 0.86021 | 0.72281 | 0.39687 |
| 107 H  | H107  | 0.78568 | 0.77699 | 0.18406 |
| 108 H  | H108  | 0.90879 | 0.94280 | 0.19660 |
| 109 O  | O109  | 0.74793 | 0.88975 | 0.33345 |
| 110 O  | O110  | 0.87125 | 0.72292 | 0.34874 |
| 111 O  | O111  | 0.77322 | 0.77704 | 0.23205 |
| 112 O  | O112  | 0.89590 | 0.94365 | 0.24455 |
| 113 O  | O113  | 0.50674 | 0.33682 | 0.32833 |
| 114 O  | O114  | 0.51230 | 0.30906 | 0.39854 |

**Co(OH)<sub>2</sub>-High Spin-<sup>\*</sup>+O<sub>2</sub>**

|      |     | <i>x</i> | <i>y</i> | <i>z</i> |
|------|-----|----------|----------|----------|
| 1 Co | Co1 | 0.02156  | 0.00011  | 0.29532  |
| 2 Co | Co2 | 0.14012  | 0.16660  | 0.24790  |

|            |          |         |         |
|------------|----------|---------|---------|
| 3 H H3     | 0.05365  | 0.22372 | 0.39548 |
| 4 H H4     | 0.17575  | 0.05614 | 0.38006 |
| 5 H H5     | -0.00734 | 0.11032 | 0.19643 |
| 6 H H6     | 0.11581  | 0.27613 | 0.18386 |
| 7 O O7     | 0.03736  | 0.22308 | 0.34796 |
| 8 O O8     | 0.16055  | 0.05625 | 0.33241 |
| 9 O O9     | 0.00644  | 0.11037 | 0.24427 |
| 10 O O10   | 0.12917  | 0.27698 | 0.23175 |
| 11 Co Co11 | 0.26777  | 0.00011 | 0.26737 |
| 12 Co Co12 | 0.39012  | 0.16660 | 0.24790 |
| 13 H H13   | 0.29985  | 0.22372 | 0.36752 |
| 14 H H14   | 0.42195  | 0.05614 | 0.35211 |
| 15 H H15   | 0.23886  | 0.11032 | 0.16847 |
| 16 H H16   | 0.36201  | 0.27613 | 0.15591 |
| 17 O O17   | 0.28356  | 0.22308 | 0.32000 |
| 18 O O18   | 0.40676  | 0.05625 | 0.30445 |
| 19 O O19   | 0.25264  | 0.11037 | 0.21631 |
| 20 O O20   | 0.37537  | 0.27698 | 0.20380 |
| 21 Co Co21 | 0.51397  | 0.00011 | 0.23941 |
| 22 Co Co22 | 0.64012  | 0.16660 | 0.24790 |
| 23 H H23   | 0.66815  | 0.05614 | 0.32415 |
| 24 H H24   | 0.48506  | 0.11032 | 0.14052 |
| 25 H H25   | 0.60822  | 0.27613 | 0.12795 |
| 26 O O26   | 0.65296  | 0.05625 | 0.27650 |
| 27 O O27   | 0.49884  | 0.11037 | 0.18836 |
| 28 O O28   | 0.62158  | 0.27698 | 0.17585 |

|            |          |         |         |
|------------|----------|---------|---------|
| 29 Co Co29 | 0.76017  | 0.00011 | 0.21146 |
| 30 Co Co30 | 0.89012  | 0.16660 | 0.24790 |
| 31 H H31   | 0.79226  | 0.22372 | 0.31161 |
| 32 H H32   | 0.91435  | 0.05614 | 0.29620 |
| 33 H H33   | 0.73126  | 0.11032 | 0.11256 |
| 34 H H34   | 0.85442  | 0.27613 | 0.10000 |
| 35 O O35   | 0.77597  | 0.22308 | 0.26409 |
| 36 O O36   | 0.89916  | 0.05625 | 0.24854 |
| 37 O O37   | 0.74504  | 0.11037 | 0.16040 |
| 38 O O38   | 0.86778  | 0.27698 | 0.14789 |
| 39 Co Co39 | 0.00997  | 0.33345 | 0.27373 |
| 40 Co Co40 | 0.14012  | 0.49993 | 0.24790 |
| 41 H H41   | -0.00066 | 0.55705 | 0.29852 |
| 42 H H42   | 0.16953  | 0.38947 | 0.38337 |
| 43 H H43   | 0.00153  | 0.44366 | 0.17230 |
| 44 H H44   | 0.17013  | 0.60947 | 0.11343 |
| 45 O O45   | 0.00927  | 0.55642 | 0.25028 |
| 46 O O46   | 0.15434  | 0.38958 | 0.33571 |
| 47 O O47   | 0.00878  | 0.44371 | 0.22073 |
| 48 O O48   | 0.15725  | 0.61032 | 0.16138 |
| 49 Co Co49 | 0.25902  | 0.33345 | 0.25970 |
| 50 Co Co50 | 0.39012  | 0.49993 | 0.24790 |
| 51 H H51   | 0.24554  | 0.55705 | 0.32647 |
| 52 H H52   | 0.25058  | 0.44366 | 0.15827 |
| 53 H H53   | 0.41633  | 0.60947 | 0.14138 |
| 54 O O54   | 0.25548  | 0.55642 | 0.27823 |

|            |          |         |         |
|------------|----------|---------|---------|
| 55 O O55   | 0.25783  | 0.44371 | 0.20670 |
| 56 O O56   | 0.40345  | 0.61032 | 0.18933 |
| 57 Co Co57 | 0.50807  | 0.33345 | 0.24567 |
| 58 Co Co58 | 0.64012  | 0.49993 | 0.24790 |
| 59 H H59   | 0.49174  | 0.55705 | 0.35443 |
| 60 H H60   | 0.49963  | 0.44366 | 0.14423 |
| 61 H H61   | 0.66254  | 0.60947 | 0.16934 |
| 62 O O62   | 0.50168  | 0.55642 | 0.30618 |
| 63 O O63   | 0.50688  | 0.44371 | 0.19267 |
| 64 O O64   | 0.64965  | 0.61032 | 0.21728 |
| 65 Co Co65 | 0.75712  | 0.33345 | 0.23164 |
| 66 Co Co66 | 0.89012  | 0.49993 | 0.24790 |
| 67 H H67   | 0.73794  | 0.55705 | 0.38238 |
| 68 H H68   | 0.74868  | 0.44366 | 0.13020 |
| 69 H H69   | 0.90874  | 0.60947 | 0.19729 |
| 70 O O70   | 0.74788  | 0.55642 | 0.33414 |
| 71 O O71   | 0.75593  | 0.44371 | 0.17863 |
| 72 O O72   | 0.89585  | 0.61032 | 0.24524 |
| 73 Co Co73 | 0.01674  | 0.66678 | 0.22378 |
| 74 Co Co74 | 0.14135  | 0.83327 | 0.22960 |
| 75 H H75   | -0.00061 | 0.89039 | 0.29783 |
| 76 H H76   | 0.12161  | 0.72281 | 0.31301 |
| 77 H H77   | 0.04708  | 0.77699 | 0.10020 |
| 78 H H78   | 0.17018  | 0.94280 | 0.11274 |
| 79 O O79   | 0.00932  | 0.88975 | 0.24959 |
| 80 O O80   | 0.13264  | 0.72292 | 0.26488 |

|     |    |       |         |         |         |
|-----|----|-------|---------|---------|---------|
| 81  | O  | O81   | 0.03462 | 0.77704 | 0.14819 |
| 82  | O  | O82   | 0.15730 | 0.94365 | 0.16069 |
| 83  | Co | Co83  | 0.26579 | 0.66678 | 0.23781 |
| 84  | Co | Co84  | 0.39040 | 0.83327 | 0.24363 |
| 85  | H  | H85   | 0.24559 | 0.89039 | 0.32578 |
| 86  | H  | H86   | 0.36781 | 0.72281 | 0.34096 |
| 87  | H  | H87   | 0.29328 | 0.77699 | 0.12815 |
| 88  | H  | H88   | 0.41638 | 0.94280 | 0.14070 |
| 89  | O  | O89   | 0.25552 | 0.88975 | 0.27754 |
| 90  | O  | O90   | 0.37885 | 0.72292 | 0.29283 |
| 91  | O  | O91   | 0.28082 | 0.77704 | 0.17614 |
| 92  | O  | O92   | 0.40350 | 0.94365 | 0.18864 |
| 93  | Co | Co93  | 0.51484 | 0.66678 | 0.25184 |
| 94  | Co | Co94  | 0.63945 | 0.83327 | 0.25766 |
| 95  | H  | H95   | 0.49179 | 0.89039 | 0.35374 |
| 96  | H  | H96   | 0.61401 | 0.72281 | 0.36891 |
| 97  | H  | H97   | 0.53948 | 0.77699 | 0.15611 |
| 98  | H  | H98   | 0.66259 | 0.94280 | 0.16865 |
| 99  | O  | O99   | 0.50173 | 0.88975 | 0.30550 |
| 100 | O  | O100  | 0.62505 | 0.72292 | 0.32079 |
| 101 | O  | O101  | 0.52702 | 0.77704 | 0.20410 |
| 102 | O  | O102  | 0.64970 | 0.94365 | 0.21660 |
| 103 | Co | Co103 | 0.76389 | 0.66678 | 0.26587 |
| 104 | Co | Co104 | 0.88850 | 0.83327 | 0.27169 |
| 105 | H  | H105  | 0.73799 | 0.89039 | 0.38169 |
| 106 | H  | H106  | 0.86021 | 0.72281 | 0.39687 |

|     |   |      |         |         |         |
|-----|---|------|---------|---------|---------|
| 107 | H | H107 | 0.78568 | 0.77699 | 0.18406 |
| 108 | H | H108 | 0.90879 | 0.94280 | 0.19660 |
| 109 | O | O109 | 0.74793 | 0.88975 | 0.33345 |
| 110 | O | O110 | 0.87125 | 0.72292 | 0.34874 |
| 111 | O | O111 | 0.77322 | 0.77704 | 0.23205 |
| 112 | O | O112 | 0.89590 | 0.94365 | 0.24455 |
| 113 | O | O113 | 0.50675 | 0.33672 | 0.35833 |
| 114 | O | O114 | 0.51231 | 0.30896 | 0.42854 |

**Co(OH)<sub>2</sub>-High Spin-\*H<sub>2</sub>O<sub>2</sub>**

|    |    |      | x        | y       | z       |
|----|----|------|----------|---------|---------|
| 1  | Co | Co1  | 0.02156  | 0.00011 | 0.29532 |
| 2  | Co | Co2  | 0.14012  | 0.16660 | 0.24790 |
| 3  | H  | H3   | 0.05365  | 0.22372 | 0.39548 |
| 4  | H  | H4   | 0.17575  | 0.05614 | 0.38006 |
| 5  | H  | H5   | -0.00734 | 0.11032 | 0.19643 |
| 6  | H  | H6   | 0.11581  | 0.27613 | 0.18386 |
| 7  | O  | O7   | 0.03736  | 0.22308 | 0.34796 |
| 8  | O  | O8   | 0.16055  | 0.05625 | 0.33241 |
| 9  | O  | O9   | 0.00644  | 0.11037 | 0.24427 |
| 10 | O  | O10  | 0.12917  | 0.27698 | 0.23175 |
| 11 | Co | Co11 | 0.26777  | 0.00011 | 0.26737 |
| 12 | Co | Co12 | 0.39012  | 0.16660 | 0.24790 |
| 13 | H  | H13  | 0.29985  | 0.22372 | 0.36752 |
| 14 | H  | H14  | 0.42195  | 0.05614 | 0.35211 |
| 15 | H  | H15  | 0.23886  | 0.11032 | 0.16847 |

|       |      |          |         |         |
|-------|------|----------|---------|---------|
| 16 H  | H16  | 0.36201  | 0.27613 | 0.15591 |
| 17 O  | O17  | 0.28356  | 0.22308 | 0.32000 |
| 18 O  | O18  | 0.40676  | 0.05625 | 0.30445 |
| 19 O  | O19  | 0.25264  | 0.11037 | 0.21631 |
| 20 O  | O20  | 0.37537  | 0.27698 | 0.20380 |
| 21 Co | Co21 | 0.51397  | 0.00011 | 0.23941 |
| 22 Co | Co22 | 0.64012  | 0.16660 | 0.24790 |
| 23 H  | H23  | 0.66815  | 0.05614 | 0.32415 |
| 24 H  | H24  | 0.48506  | 0.11032 | 0.14052 |
| 25 H  | H25  | 0.60822  | 0.27613 | 0.12795 |
| 26 O  | O26  | 0.65296  | 0.05625 | 0.27650 |
| 27 O  | O27  | 0.49884  | 0.11037 | 0.18836 |
| 28 O  | O28  | 0.62158  | 0.27698 | 0.17585 |
| 29 Co | Co29 | 0.76017  | 0.00011 | 0.21146 |
| 30 Co | Co30 | 0.89012  | 0.16660 | 0.24790 |
| 31 H  | H31  | 0.79226  | 0.22372 | 0.31161 |
| 32 H  | H32  | 0.91435  | 0.05614 | 0.29620 |
| 33 H  | H33  | 0.73126  | 0.11032 | 0.11256 |
| 34 H  | H34  | 0.85442  | 0.27613 | 0.10000 |
| 35 O  | O35  | 0.77597  | 0.22308 | 0.26409 |
| 36 O  | O36  | 0.89916  | 0.05625 | 0.24854 |
| 37 O  | O37  | 0.74504  | 0.11037 | 0.16040 |
| 38 O  | O38  | 0.86778  | 0.27698 | 0.14789 |
| 39 Co | Co39 | 0.00997  | 0.33345 | 0.27373 |
| 40 Co | Co40 | 0.14012  | 0.49993 | 0.24790 |
| 41 H  | H41  | -0.00066 | 0.55705 | 0.29852 |

|       |      |         |         |         |
|-------|------|---------|---------|---------|
| 42 H  | H42  | 0.16953 | 0.38947 | 0.38337 |
| 43 H  | H43  | 0.00153 | 0.44366 | 0.17230 |
| 44 H  | H44  | 0.17013 | 0.60947 | 0.11343 |
| 45 O  | O45  | 0.00927 | 0.55642 | 0.25028 |
| 46 O  | O46  | 0.15434 | 0.38958 | 0.33571 |
| 47 O  | O47  | 0.00878 | 0.44371 | 0.22073 |
| 48 O  | O48  | 0.15725 | 0.61032 | 0.16138 |
| 49 Co | Co49 | 0.25902 | 0.33345 | 0.25970 |
| 50 Co | Co50 | 0.39012 | 0.49993 | 0.24790 |
| 51 H  | H51  | 0.24554 | 0.55705 | 0.32647 |
| 52 H  | H52  | 0.25058 | 0.44366 | 0.15827 |
| 53 H  | H53  | 0.41633 | 0.60947 | 0.14138 |
| 54 O  | O54  | 0.25548 | 0.55642 | 0.27823 |
| 55 O  | O55  | 0.25783 | 0.44371 | 0.20670 |
| 56 O  | O56  | 0.40345 | 0.61032 | 0.18933 |
| 57 Co | Co57 | 0.50807 | 0.33345 | 0.24567 |
| 58 Co | Co58 | 0.64012 | 0.49993 | 0.24790 |
| 59 H  | H59  | 0.49174 | 0.55705 | 0.35443 |
| 60 H  | H60  | 0.49963 | 0.44366 | 0.14423 |
| 61 H  | H61  | 0.66254 | 0.60947 | 0.16934 |
| 62 O  | O62  | 0.50168 | 0.55642 | 0.30618 |
| 63 O  | O63  | 0.50688 | 0.44371 | 0.19267 |
| 64 O  | O64  | 0.64965 | 0.61032 | 0.21728 |
| 65 Co | Co65 | 0.75712 | 0.33345 | 0.23164 |
| 66 Co | Co66 | 0.89012 | 0.49993 | 0.24790 |
| 67 H  | H67  | 0.73794 | 0.55705 | 0.38238 |

|       |      |          |         |         |
|-------|------|----------|---------|---------|
| 68 H  | H68  | 0.74868  | 0.44366 | 0.13020 |
| 69 H  | H69  | 0.90874  | 0.60947 | 0.19729 |
| 70 O  | O70  | 0.74788  | 0.55642 | 0.33414 |
| 71 O  | O71  | 0.75593  | 0.44371 | 0.17863 |
| 72 O  | O72  | 0.89585  | 0.61032 | 0.24524 |
| 73 Co | Co73 | 0.01674  | 0.66678 | 0.22378 |
| 74 Co | Co74 | 0.14135  | 0.83327 | 0.22960 |
| 75 H  | H75  | -0.00061 | 0.89039 | 0.29783 |
| 76 H  | H76  | 0.12161  | 0.72281 | 0.31301 |
| 77 H  | H77  | 0.04708  | 0.77699 | 0.10020 |
| 78 H  | H78  | 0.17018  | 0.94280 | 0.11274 |
| 79 O  | O79  | 0.00932  | 0.88975 | 0.24959 |
| 80 O  | O80  | 0.13264  | 0.72292 | 0.26488 |
| 81 O  | O81  | 0.03462  | 0.77704 | 0.14819 |
| 82 O  | O82  | 0.15730  | 0.94365 | 0.16069 |
| 83 Co | Co83 | 0.26579  | 0.66678 | 0.23781 |
| 84 Co | Co84 | 0.39040  | 0.83327 | 0.24363 |
| 85 H  | H85  | 0.24559  | 0.89039 | 0.32578 |
| 86 H  | H86  | 0.36781  | 0.72281 | 0.34096 |
| 87 H  | H87  | 0.29328  | 0.77699 | 0.12815 |
| 88 H  | H88  | 0.41638  | 0.94280 | 0.14070 |
| 89 O  | O89  | 0.25552  | 0.88975 | 0.27754 |
| 90 O  | O90  | 0.37885  | 0.72292 | 0.29283 |
| 91 O  | O91  | 0.28082  | 0.77704 | 0.17614 |
| 92 O  | O92  | 0.40350  | 0.94365 | 0.18864 |
| 93 Co | Co93 | 0.51484  | 0.66678 | 0.25184 |

|        |       |         |         |         |
|--------|-------|---------|---------|---------|
| 94 Co  | Co94  | 0.63945 | 0.83327 | 0.25766 |
| 95 H   | H95   | 0.49179 | 0.89039 | 0.35374 |
| 96 H   | H96   | 0.61401 | 0.72281 | 0.36891 |
| 97 H   | H97   | 0.53948 | 0.77699 | 0.15611 |
| 98 H   | H98   | 0.66259 | 0.94280 | 0.16865 |
| 99 O   | O99   | 0.50173 | 0.88975 | 0.30550 |
| 100 O  | O100  | 0.62505 | 0.72292 | 0.32079 |
| 101 O  | O101  | 0.52702 | 0.77704 | 0.20410 |
| 102 O  | O102  | 0.64970 | 0.94365 | 0.21660 |
| 103 Co | Co103 | 0.76389 | 0.66678 | 0.26587 |
| 104 Co | Co104 | 0.88850 | 0.83327 | 0.27169 |
| 105 H  | H105  | 0.73799 | 0.89039 | 0.38169 |
| 106 H  | H106  | 0.86021 | 0.72281 | 0.39687 |
| 107 H  | H107  | 0.78568 | 0.77699 | 0.18406 |
| 108 H  | H108  | 0.90879 | 0.94280 | 0.19660 |
| 109 O  | O109  | 0.74793 | 0.88975 | 0.33345 |
| 110 O  | O110  | 0.87125 | 0.72292 | 0.34874 |
| 111 O  | O111  | 0.77322 | 0.77704 | 0.23205 |
| 112 O  | O112  | 0.89590 | 0.94365 | 0.24455 |
| 113 O  | O113  | 0.49304 | 0.26202 | 0.38599 |
| 114 O  | O114  | 0.49620 | 0.33190 | 0.34038 |
| 115 H  | H115  | 0.46631 | 0.38586 | 0.36679 |
| 116 H  | H116  | 0.52293 | 0.20807 | 0.35958 |

**Co(OH)<sub>2</sub>-High Spin-<sup>\*</sup>+H<sub>2</sub>O<sub>2</sub>**

x            y            z

|       |      |          |         |         |
|-------|------|----------|---------|---------|
| 1 Co  | Co1  | 0.02156  | 0.00011 | 0.29532 |
| 2 Co  | Co2  | 0.14012  | 0.16660 | 0.24790 |
| 3 H   | H3   | 0.05365  | 0.22372 | 0.39548 |
| 4 H   | H4   | 0.17575  | 0.05614 | 0.38006 |
| 5 H   | H5   | -0.00734 | 0.11032 | 0.19643 |
| 6 H   | H6   | 0.11581  | 0.27613 | 0.18386 |
| 7 O   | O7   | 0.03736  | 0.22308 | 0.34796 |
| 8 O   | O8   | 0.16055  | 0.05625 | 0.33241 |
| 9 O   | O9   | 0.00644  | 0.11037 | 0.24427 |
| 10 O  | O10  | 0.12917  | 0.27698 | 0.23175 |
| 11 Co | Co11 | 0.26777  | 0.00011 | 0.26737 |
| 12 Co | Co12 | 0.39012  | 0.16660 | 0.24790 |
| 13 H  | H13  | 0.29985  | 0.22372 | 0.36752 |
| 14 H  | H14  | 0.42195  | 0.05614 | 0.35211 |
| 15 H  | H15  | 0.23886  | 0.11032 | 0.16847 |
| 16 H  | H16  | 0.36201  | 0.27613 | 0.15591 |
| 17 O  | O17  | 0.28356  | 0.22308 | 0.32000 |
| 18 O  | O18  | 0.40676  | 0.05625 | 0.30445 |
| 19 O  | O19  | 0.25264  | 0.11037 | 0.21631 |
| 20 O  | O20  | 0.37537  | 0.27698 | 0.20380 |
| 21 Co | Co21 | 0.51397  | 0.00011 | 0.23941 |
| 22 Co | Co22 | 0.64012  | 0.16660 | 0.24790 |
| 23 H  | H23  | 0.66815  | 0.05614 | 0.32415 |
| 24 H  | H24  | 0.48506  | 0.11032 | 0.14052 |
| 25 H  | H25  | 0.60822  | 0.27613 | 0.12795 |
| 26 O  | O26  | 0.65296  | 0.05625 | 0.27650 |

|       |      |          |         |         |
|-------|------|----------|---------|---------|
| 27 O  | O27  | 0.49884  | 0.11037 | 0.18836 |
| 28 O  | O28  | 0.62158  | 0.27698 | 0.17585 |
| 29 Co | Co29 | 0.76017  | 0.00011 | 0.21146 |
| 30 Co | Co30 | 0.89012  | 0.16660 | 0.24790 |
| 31 H  | H31  | 0.79226  | 0.22372 | 0.31161 |
| 32 H  | H32  | 0.91435  | 0.05614 | 0.29620 |
| 33 H  | H33  | 0.73126  | 0.11032 | 0.11256 |
| 34 H  | H34  | 0.85442  | 0.27613 | 0.10000 |
| 35 O  | O35  | 0.77597  | 0.22308 | 0.26409 |
| 36 O  | O36  | 0.89916  | 0.05625 | 0.24854 |
| 37 O  | O37  | 0.74504  | 0.11037 | 0.16040 |
| 38 O  | O38  | 0.86778  | 0.27698 | 0.14789 |
| 39 Co | Co39 | 0.00997  | 0.33345 | 0.27373 |
| 40 Co | Co40 | 0.14012  | 0.49993 | 0.24790 |
| 41 H  | H41  | -0.00066 | 0.55705 | 0.29852 |
| 42 H  | H42  | 0.16953  | 0.38947 | 0.38337 |
| 43 H  | H43  | 0.00153  | 0.44366 | 0.17230 |
| 44 H  | H44  | 0.17013  | 0.60947 | 0.11343 |
| 45 O  | O45  | 0.00927  | 0.55642 | 0.25028 |
| 46 O  | O46  | 0.15434  | 0.38958 | 0.33571 |
| 47 O  | O47  | 0.00878  | 0.44371 | 0.22073 |
| 48 O  | O48  | 0.15725  | 0.61032 | 0.16138 |
| 49 Co | Co49 | 0.25902  | 0.33345 | 0.25970 |
| 50 Co | Co50 | 0.39012  | 0.49993 | 0.24790 |
| 51 H  | H51  | 0.24554  | 0.55705 | 0.32647 |
| 52 H  | H52  | 0.25058  | 0.44366 | 0.15827 |

|            |          |         |          |
|------------|----------|---------|----------|
| 53 H H53   | 0.41633  | 0.60947 | 0.14138  |
| 54 O O54   | 0.25548  | 0.55642 | 0.27823  |
| 55 O O55   | 0.25783  | 0.44371 | 0.206701 |
| 56 O O56   | 0.40345  | 0.61032 | 0.18933  |
| 57 Co Co57 | 0.50807  | 0.33345 | 0.24567  |
| 58 Co Co58 | 0.64012  | 0.49993 | 0.24790  |
| 59 H H59   | 0.49174  | 0.55705 | 0.35443  |
| 60 H H60   | 0.49963  | 0.44366 | 0.14423  |
| 61 H H61   | 0.66254  | 0.60947 | 0.16934  |
| 62 O O62   | 0.50168  | 0.55642 | 0.30618  |
| 63 O O63   | 0.50688  | 0.44371 | 0.19267  |
| 64 O O64   | 0.64965  | 0.61032 | 0.21728  |
| 65 Co Co65 | 0.75712  | 0.33345 | 0.23164  |
| 66 Co Co66 | 0.89012  | 0.49993 | 0.24790  |
| 67 H H67   | 0.73794  | 0.55705 | 0.38238  |
| 68 H H68   | 0.74868  | 0.44366 | 0.13020  |
| 69 H H69   | 0.90874  | 0.60947 | 0.19729  |
| 70 O O70   | 0.74788  | 0.55642 | 0.33414  |
| 71 O O71   | 0.75593  | 0.44371 | 0.17863  |
| 72 O O72   | 0.89585  | 0.61032 | 0.24524  |
| 73 Co Co73 | 0.01674  | 0.66678 | 0.22378  |
| 74 Co Co74 | 0.14135  | 0.83327 | 0.22960  |
| 75 H H75   | -0.00061 | 0.89039 | 0.29783  |
| 76 H H76   | 0.12161  | 0.72281 | 0.31301  |
| 77 H H77   | 0.04708  | 0.77699 | 0.10020  |
| 78 H H78   | 0.17018  | 0.94280 | 0.11274  |

|              |         |         |         |
|--------------|---------|---------|---------|
| 79 O O79     | 0.00932 | 0.88975 | 0.24959 |
| 80 O O80     | 0.13264 | 0.72292 | 0.26488 |
| 81 O O81     | 0.03462 | 0.77704 | 0.14819 |
| 82 O O82     | 0.15730 | 0.94365 | 0.16069 |
| 83 Co Co83   | 0.26579 | 0.66678 | 0.23781 |
| 84 Co Co84   | 0.39040 | 0.83327 | 0.24363 |
| 85 H H85     | 0.24559 | 0.89039 | 0.32578 |
| 86 H H86     | 0.36781 | 0.72281 | 0.34096 |
| 87 H H87     | 0.29328 | 0.77699 | 0.12815 |
| 88 H H88     | 0.41638 | 0.94280 | 0.14070 |
| 89 O O89     | 0.25552 | 0.88975 | 0.27754 |
| 90 O O90     | 0.37885 | 0.72292 | 0.29283 |
| 91 O O91     | 0.28082 | 0.77704 | 0.17614 |
| 92 O O92     | 0.40350 | 0.94365 | 0.18864 |
| 93 Co Co93   | 0.51484 | 0.66678 | 0.25184 |
| 94 Co Co94   | 0.63945 | 0.83327 | 0.25766 |
| 95 H H95     | 0.49179 | 0.89039 | 0.35374 |
| 96 H H96     | 0.61401 | 0.72281 | 0.36891 |
| 97 H H97     | 0.53948 | 0.77699 | 0.15611 |
| 98 H H98     | 0.66259 | 0.94280 | 0.16865 |
| 99 O O99     | 0.50173 | 0.88975 | 0.30550 |
| 100 O O100   | 0.62505 | 0.72292 | 0.32079 |
| 101 O O101   | 0.52702 | 0.77704 | 0.20410 |
| 102 O O102   | 0.64970 | 0.94365 | 0.21660 |
| 103 Co Co103 | 0.76389 | 0.66678 | 0.26587 |
| 104 Co Co104 | 0.88850 | 0.83327 | 0.27169 |

|     |   |      |         |         |         |
|-----|---|------|---------|---------|---------|
| 105 | H | H105 | 0.73799 | 0.89039 | 0.38169 |
| 106 | H | H106 | 0.86021 | 0.72281 | 0.39687 |
| 107 | H | H107 | 0.78568 | 0.77699 | 0.18406 |
| 108 | H | H108 | 0.90879 | 0.94280 | 0.19660 |
| 109 | O | O109 | 0.74793 | 0.88975 | 0.33345 |
| 110 | O | O110 | 0.87125 | 0.72292 | 0.34874 |
| 111 | O | O111 | 0.77322 | 0.77704 | 0.23205 |
| 112 | O | O112 | 0.89590 | 0.94365 | 0.24455 |
| 113 | O | O113 | 0.49282 | 0.26204 | 0.40599 |
| 114 | O | O114 | 0.49599 | 0.33193 | 0.36038 |
| 115 | H | H115 | 0.46609 | 0.38588 | 0.38679 |
| 116 | H | H116 | 0.52271 | 0.20809 | 0.37958 |

**Co(OH)<sub>2</sub>-Low Spin-\*H<sub>2</sub>O**

|    |    |      | <i>x</i> | <i>y</i> | <i>z</i> |
|----|----|------|----------|----------|----------|
| 1  | Co | Co1  | 0.01511  | 0.00011  | 0.20057  |
| 2  | Co | Co2  | 0.14012  | 0.16660  | 0.20078  |
| 3  | H  | H3   | 0.01991  | 0.22372  | 0.30141  |
| 4  | H  | H4   | 0.14410  | 0.05614  | 0.30130  |
| 5  | H  | H5   | 0.01330  | 0.11032  | 0.10002  |
| 6  | H  | H6   | 0.13819  | 0.27613  | 0.10000  |
| 7  | O  | O7   | 0.01668  | 0.22308  | 0.25279  |
| 8  | O  | O8   | 0.14199  | 0.05625  | 0.25267  |
| 9  | O  | O9   | 0.01397  | 0.11037  | 0.14868  |
| 10 | O  | O10  | 0.13843  | 0.27698  | 0.14866  |
| 11 | Co | Co11 | 0.26511  | 0.00011  | 0.20057  |

|    |    |      |         |         |         |
|----|----|------|---------|---------|---------|
| 12 | Co | Co12 | 0.39012 | 0.16660 | 0.20078 |
| 13 | H  | H13  | 0.26991 | 0.22372 | 0.30141 |
| 14 | H  | H14  | 0.39410 | 0.05614 | 0.30130 |
| 15 | H  | H15  | 0.26330 | 0.11032 | 0.10002 |
| 16 | H  | H16  | 0.38819 | 0.27613 | 0.10000 |
| 17 | O  | O17  | 0.26668 | 0.22308 | 0.25279 |
| 18 | O  | O18  | 0.39199 | 0.05625 | 0.25267 |
| 19 | O  | O19  | 0.26397 | 0.11037 | 0.14868 |
| 20 | O  | O20  | 0.38843 | 0.27698 | 0.14866 |
| 21 | Co | Co21 | 0.51511 | 0.00011 | 0.20057 |
| 22 | Co | Co22 | 0.64012 | 0.16660 | 0.20078 |
| 23 | H  | H23  | 0.64410 | 0.05614 | 0.30130 |
| 24 | H  | H24  | 0.51330 | 0.11032 | 0.10002 |
| 25 | H  | H25  | 0.63819 | 0.27613 | 0.10000 |
| 26 | O  | O26  | 0.64199 | 0.05625 | 0.25267 |
| 27 | O  | O27  | 0.51397 | 0.11037 | 0.14868 |
| 28 | O  | O28  | 0.63843 | 0.27698 | 0.14866 |
| 29 | Co | Co29 | 0.76511 | 0.00011 | 0.20057 |
| 30 | Co | Co30 | 0.89012 | 0.16660 | 0.20078 |
| 31 | H  | H31  | 0.76991 | 0.22372 | 0.30141 |
| 32 | H  | H32  | 0.89410 | 0.05614 | 0.30130 |
| 33 | H  | H33  | 0.76330 | 0.11032 | 0.10002 |
| 34 | H  | H34  | 0.88819 | 0.27613 | 0.10000 |
| 35 | O  | O35  | 0.76668 | 0.22308 | 0.25279 |
| 36 | O  | O36  | 0.89199 | 0.05625 | 0.25267 |
| 37 | O  | O37  | 0.76397 | 0.11037 | 0.14868 |

|       |      |         |         |         |
|-------|------|---------|---------|---------|
| 38 O  | O38  | 0.88843 | 0.27698 | 0.14866 |
| 39 Co | Co39 | 0.01511 | 0.33345 | 0.20057 |
| 40 Co | Co40 | 0.14012 | 0.49993 | 0.20078 |
| 41 H  | H41  | 0.01991 | 0.55705 | 0.30141 |
| 42 H  | H42  | 0.14410 | 0.38947 | 0.30130 |
| 43 H  | H43  | 0.01330 | 0.44366 | 0.10002 |
| 44 H  | H44  | 0.13819 | 0.60947 | 0.10000 |
| 45 O  | O45  | 0.01668 | 0.55642 | 0.25279 |
| 46 O  | O46  | 0.14199 | 0.38958 | 0.25267 |
| 47 O  | O47  | 0.01397 | 0.44371 | 0.14868 |
| 48 O  | O48  | 0.13843 | 0.61032 | 0.14866 |
| 49 Co | Co49 | 0.26511 | 0.33345 | 0.20057 |
| 50 Co | Co50 | 0.39012 | 0.49993 | 0.20078 |
| 51 H  | H51  | 0.26991 | 0.55705 | 0.30141 |
| 52 H  | H52  | 0.26330 | 0.44366 | 0.10002 |
| 53 H  | H53  | 0.38819 | 0.60947 | 0.10000 |
| 54 O  | O54  | 0.26668 | 0.55642 | 0.25279 |
| 55 O  | O55  | 0.26397 | 0.44371 | 0.14868 |
| 56 O  | O56  | 0.38843 | 0.61032 | 0.14866 |
| 57 Co | Co57 | 0.51511 | 0.33345 | 0.20057 |
| 58 Co | Co58 | 0.64012 | 0.49993 | 0.20078 |
| 59 H  | H59  | 0.51991 | 0.55705 | 0.30141 |
| 60 H  | H60  | 0.51330 | 0.44366 | 0.10002 |
| 61 H  | H61  | 0.63819 | 0.60947 | 0.10000 |
| 62 O  | O62  | 0.51668 | 0.55642 | 0.25279 |
| 63 O  | O63  | 0.51397 | 0.44371 | 0.14868 |

|            |         |         |         |
|------------|---------|---------|---------|
| 64 O O64   | 0.63843 | 0.61032 | 0.14866 |
| 65 Co Co65 | 0.76511 | 0.33345 | 0.20057 |
| 66 Co Co66 | 0.89012 | 0.49993 | 0.20078 |
| 67 H H67   | 0.76991 | 0.55705 | 0.30141 |
| 68 H H68   | 0.76330 | 0.44366 | 0.10002 |
| 69 H H69   | 0.88819 | 0.60947 | 0.10000 |
| 70 O O70   | 0.76668 | 0.55642 | 0.25279 |
| 71 O O71   | 0.76397 | 0.44371 | 0.14868 |
| 72 O O72   | 0.88843 | 0.61032 | 0.14866 |
| 73 Co Co73 | 0.01511 | 0.66678 | 0.20057 |
| 74 Co Co74 | 0.14012 | 0.83327 | 0.20078 |
| 75 H H75   | 0.01991 | 0.89039 | 0.30141 |
| 76 H H76   | 0.14410 | 0.72281 | 0.30130 |
| 77 H H77   | 0.01330 | 0.77699 | 0.10002 |
| 78 H H78   | 0.13819 | 0.94280 | 0.10000 |
| 79 O O79   | 0.01668 | 0.88975 | 0.25279 |
| 80 O O80   | 0.14199 | 0.72292 | 0.25267 |
| 81 O O81   | 0.01397 | 0.77704 | 0.14868 |
| 82 O O82   | 0.13843 | 0.94365 | 0.14866 |
| 83 Co Co83 | 0.26511 | 0.66678 | 0.20057 |
| 84 Co Co84 | 0.39012 | 0.83327 | 0.20078 |
| 85 H H85   | 0.26991 | 0.89039 | 0.30141 |
| 86 H H86   | 0.39410 | 0.72281 | 0.30130 |
| 87 H H87   | 0.26330 | 0.77699 | 0.10002 |
| 88 H H88   | 0.38819 | 0.94280 | 0.10000 |
| 89 O O89   | 0.26668 | 0.88975 | 0.25279 |

|              |         |         |         |
|--------------|---------|---------|---------|
| 90 O O90     | 0.39199 | 0.72292 | 0.25267 |
| 91 O O91     | 0.26397 | 0.77704 | 0.14868 |
| 92 O O92     | 0.38843 | 0.94365 | 0.14866 |
| 93 Co Co93   | 0.51511 | 0.66678 | 0.20057 |
| 94 Co Co94   | 0.64012 | 0.83327 | 0.20078 |
| 95 H H95     | 0.51991 | 0.89039 | 0.30141 |
| 96 H H96     | 0.64410 | 0.72281 | 0.30130 |
| 97 H H97     | 0.51330 | 0.77699 | 0.10002 |
| 98 H H98     | 0.63819 | 0.94280 | 0.10000 |
| 99 O O99     | 0.51668 | 0.88975 | 0.25279 |
| 100 O O100   | 0.64199 | 0.72292 | 0.25267 |
| 101 O O101   | 0.51397 | 0.77704 | 0.14868 |
| 102 O O102   | 0.63843 | 0.94365 | 0.14866 |
| 103 Co Co103 | 0.76511 | 0.66678 | 0.20057 |
| 104 Co Co104 | 0.89012 | 0.83327 | 0.20078 |
| 105 H H105   | 0.76991 | 0.89039 | 0.30141 |
| 106 H H106   | 0.89410 | 0.72281 | 0.30130 |
| 107 H H107   | 0.76330 | 0.77699 | 0.10002 |
| 108 H H108   | 0.88819 | 0.94280 | 0.10000 |
| 109 O O109   | 0.76668 | 0.88975 | 0.25279 |
| 110 O O110   | 0.89199 | 0.72292 | 0.25267 |
| 111 O O111   | 0.76397 | 0.77704 | 0.14868 |
| 112 O O112   | 0.88843 | 0.94365 | 0.14866 |
| 113 O O113   | 0.53029 | 0.33740 | 0.32052 |
| 114 H H114   | 0.54342 | 0.39003 | 0.35342 |
| 115 H H115   | 0.54679 | 0.28142 | 0.34873 |

**Co(OH)<sub>2</sub>-Low Spin-\*OH**

|    |         | <i>x</i> | <i>y</i> | <i>z</i> |
|----|---------|----------|----------|----------|
| 1  | Co Co1  | 0.01511  | 0.00011  | 0.20057  |
| 2  | Co Co2  | 0.14012  | 0.16660  | 0.20078  |
| 3  | H H3    | 0.01991  | 0.22372  | 0.30141  |
| 4  | H H4    | 0.14410  | 0.05614  | 0.30130  |
| 5  | H H5    | 0.01330  | 0.11032  | 0.10002  |
| 6  | H H6    | 0.13819  | 0.27613  | 0.10000  |
| 7  | O O7    | 0.01668  | 0.22308  | 0.25279  |
| 8  | O O8    | 0.14199  | 0.05625  | 0.25267  |
| 9  | O O9    | 0.01397  | 0.11037  | 0.14868  |
| 10 | O O10   | 0.13843  | 0.27698  | 0.14866  |
| 11 | Co Co11 | 0.26511  | 0.00011  | 0.20057  |
| 12 | Co Co12 | 0.39012  | 0.16660  | 0.20078  |
| 13 | H H13   | 0.26991  | 0.22372  | 0.30141  |
| 14 | H H14   | 0.39410  | 0.05614  | 0.30130  |
| 15 | H H15   | 0.26330  | 0.11032  | 0.10002  |
| 16 | H H16   | 0.38819  | 0.27613  | 0.10000  |
| 17 | O O17   | 0.26668  | 0.22308  | 0.25279  |
| 18 | O O18   | 0.39199  | 0.05625  | 0.25267  |
| 19 | O O19   | 0.26397  | 0.11037  | 0.14868  |
| 20 | O O20   | 0.38843  | 0.27698  | 0.14866  |
| 21 | Co Co21 | 0.51511  | 0.00011  | 0.20057  |
| 22 | Co Co22 | 0.64012  | 0.16660  | 0.20078  |
| 23 | H H23   | 0.64410  | 0.05614  | 0.30130  |

|       |      |         |         |         |
|-------|------|---------|---------|---------|
| 24 H  | H24  | 0.51330 | 0.11032 | 0.10002 |
| 25 H  | H25  | 0.63819 | 0.27613 | 0.10000 |
| 26 O  | O26  | 0.64199 | 0.05625 | 0.25267 |
| 27 O  | O27  | 0.51397 | 0.11037 | 0.14868 |
| 28 O  | O28  | 0.63843 | 0.27698 | 0.14866 |
| 29 Co | Co29 | 0.76511 | 0.00011 | 0.20057 |
| 30 Co | Co30 | 0.89012 | 0.16660 | 0.20078 |
| 31 H  | H31  | 0.76991 | 0.22372 | 0.30141 |
| 32 H  | H32  | 0.89410 | 0.05614 | 0.30130 |
| 33 H  | H33  | 0.76330 | 0.11032 | 0.10002 |
| 34 H  | H34  | 0.88819 | 0.27613 | 0.10000 |
| 35 O  | O35  | 0.76668 | 0.22308 | 0.25279 |
| 36 O  | O36  | 0.89199 | 0.05625 | 0.25267 |
| 37 O  | O37  | 0.76397 | 0.11037 | 0.14868 |
| 38 O  | O38  | 0.88843 | 0.27698 | 0.14866 |
| 39 Co | Co39 | 0.01511 | 0.33345 | 0.20057 |
| 40 Co | Co40 | 0.14012 | 0.49993 | 0.20078 |
| 41 H  | H41  | 0.01991 | 0.55705 | 0.30141 |
| 42 H  | H42  | 0.14410 | 0.38947 | 0.30130 |
| 43 H  | H43  | 0.01330 | 0.44366 | 0.10002 |
| 44 H  | H44  | 0.13819 | 0.60947 | 0.10000 |
| 45 O  | O45  | 0.01668 | 0.55642 | 0.25279 |
| 46 O  | O46  | 0.14199 | 0.38958 | 0.25267 |
| 47 O  | O47  | 0.01397 | 0.44371 | 0.14868 |
| 48 O  | O48  | 0.13843 | 0.61032 | 0.14866 |
| 49 Co | Co49 | 0.26511 | 0.33345 | 0.20057 |

|            |         |         |         |
|------------|---------|---------|---------|
| 50 Co Co50 | 0.39012 | 0.49993 | 0.20078 |
| 51 H H51   | 0.26991 | 0.55705 | 0.30141 |
| 52 H H52   | 0.26330 | 0.44366 | 0.10002 |
| 53 H H53   | 0.38819 | 0.60947 | 0.10000 |
| 54 O O54   | 0.26668 | 0.55642 | 0.25279 |
| 55 O O55   | 0.26397 | 0.44371 | 0.14868 |
| 56 O O56   | 0.38843 | 0.61032 | 0.14866 |
| 57 Co Co57 | 0.51511 | 0.33345 | 0.20057 |
| 58 Co Co58 | 0.64012 | 0.49993 | 0.20078 |
| 59 H H59   | 0.51991 | 0.55705 | 0.30141 |
| 60 H H60   | 0.51330 | 0.44366 | 0.10002 |
| 61 H H61   | 0.63819 | 0.60947 | 0.10000 |
| 62 O O62   | 0.51668 | 0.55642 | 0.25279 |
| 63 O O63   | 0.51397 | 0.44371 | 0.14868 |
| 64 O O64   | 0.63843 | 0.61032 | 0.14866 |
| 65 Co Co65 | 0.76511 | 0.33345 | 0.20057 |
| 66 Co Co66 | 0.89012 | 0.49993 | 0.20078 |
| 67 H H67   | 0.76991 | 0.55705 | 0.30141 |
| 68 H H68   | 0.76330 | 0.44366 | 0.10002 |
| 69 H H69   | 0.88819 | 0.60947 | 0.10000 |
| 70 O O70   | 0.76668 | 0.55642 | 0.25279 |
| 71 O O71   | 0.76397 | 0.44371 | 0.14868 |
| 72 O O72   | 0.88843 | 0.61032 | 0.14866 |
| 73 Co Co73 | 0.01511 | 0.66678 | 0.20057 |
| 74 Co Co74 | 0.14012 | 0.83327 | 0.20078 |
| 75 H H75   | 0.01991 | 0.89039 | 0.30141 |

|       |      |         |         |         |
|-------|------|---------|---------|---------|
| 76 H  | H76  | 0.14410 | 0.72281 | 0.30130 |
| 77 H  | H77  | 0.01330 | 0.77699 | 0.10002 |
| 78 H  | H78  | 0.13819 | 0.94280 | 0.10000 |
| 79 O  | O79  | 0.01668 | 0.88975 | 0.25279 |
| 80 O  | O80  | 0.14199 | 0.72292 | 0.25267 |
| 81 O  | O81  | 0.01397 | 0.77704 | 0.14868 |
| 82 O  | O82  | 0.13843 | 0.94365 | 0.14866 |
| 83 Co | Co83 | 0.26511 | 0.66678 | 0.20057 |
| 84 Co | Co84 | 0.39012 | 0.83327 | 0.20078 |
| 85 H  | H85  | 0.26991 | 0.89039 | 0.30141 |
| 86 H  | H86  | 0.39410 | 0.72281 | 0.30130 |
| 87 H  | H87  | 0.26330 | 0.77699 | 0.10002 |
| 88 H  | H88  | 0.38819 | 0.94280 | 0.10000 |
| 89 O  | O89  | 0.26668 | 0.88975 | 0.25279 |
| 90 O  | O90  | 0.39199 | 0.72292 | 0.25267 |
| 91 O  | O91  | 0.26397 | 0.77704 | 0.14868 |
| 92 O  | O92  | 0.38843 | 0.94365 | 0.14866 |
| 93 Co | Co93 | 0.51511 | 0.66678 | 0.20057 |
| 94 Co | Co94 | 0.64012 | 0.83327 | 0.20078 |
| 95 H  | H95  | 0.51991 | 0.89039 | 0.30141 |
| 96 H  | H96  | 0.64410 | 0.72281 | 0.30130 |
| 97 H  | H97  | 0.51330 | 0.77699 | 0.10002 |
| 98 H  | H98  | 0.63819 | 0.94280 | 0.10000 |
| 99 O  | O99  | 0.51668 | 0.88975 | 0.25279 |
| 100 O | O100 | 0.64199 | 0.72292 | 0.25267 |
| 101 O | O101 | 0.51397 | 0.77704 | 0.14868 |

|     |    |       |         |         |         |
|-----|----|-------|---------|---------|---------|
| 102 | O  | O102  | 0.63843 | 0.94365 | 0.14866 |
| 103 | Co | Co103 | 0.76511 | 0.66678 | 0.20057 |
| 104 | Co | Co104 | 0.89012 | 0.83327 | 0.20078 |
| 105 | H  | H105  | 0.76991 | 0.89039 | 0.30141 |
| 106 | H  | H106  | 0.89410 | 0.72281 | 0.30130 |
| 107 | H  | H107  | 0.76330 | 0.77699 | 0.10002 |
| 108 | H  | H108  | 0.88819 | 0.94280 | 0.10000 |
| 109 | O  | O109  | 0.76668 | 0.88975 | 0.25279 |
| 110 | O  | O110  | 0.89199 | 0.72292 | 0.25267 |
| 111 | O  | O111  | 0.76397 | 0.77704 | 0.14868 |
| 112 | O  | O112  | 0.88843 | 0.94365 | 0.14866 |
| 113 | O  | O113  | 0.51208 | 0.33321 | 0.29089 |
| 114 | H  | H114  | 0.50265 | 0.37175 | 0.33577 |

**Co(OH)<sub>2</sub>-Low Spin-\*O**

|    |    |     | <i>x</i> | <i>y</i> | <i>z</i> |
|----|----|-----|----------|----------|----------|
| 1  | Co | Co1 | 0.01511  | 0.00011  | 0.20057  |
| 2  | Co | Co2 | 0.14012  | 0.16660  | 0.20078  |
| 3  | H  | H3  | 0.01991  | 0.22372  | 0.30141  |
| 4  | H  | H4  | 0.14410  | 0.05614  | 0.30130  |
| 5  | H  | H5  | 0.01330  | 0.11032  | 0.10002  |
| 6  | H  | H6  | 0.13819  | 0.27613  | 0.10000  |
| 7  | O  | O7  | 0.01668  | 0.22308  | 0.25279  |
| 8  | O  | O8  | 0.14199  | 0.05625  | 0.25267  |
| 9  | O  | O9  | 0.01397  | 0.11037  | 0.14868  |
| 10 | O  | O10 | 0.13843  | 0.27698  | 0.14866  |

|       |      |         |         |         |
|-------|------|---------|---------|---------|
| 11 Co | Co11 | 0.26511 | 0.00011 | 0.20057 |
| 12 Co | Co12 | 0.39012 | 0.16660 | 0.20078 |
| 13 H  | H13  | 0.26991 | 0.22372 | 0.30141 |
| 14 H  | H14  | 0.39410 | 0.05614 | 0.30130 |
| 15 H  | H15  | 0.26330 | 0.11032 | 0.10002 |
| 16 H  | H16  | 0.38819 | 0.27613 | 0.10000 |
| 17 O  | O17  | 0.26668 | 0.22308 | 0.25279 |
| 18 O  | O18  | 0.39199 | 0.05625 | 0.25267 |
| 19 O  | O19  | 0.26397 | 0.11037 | 0.14868 |
| 20 O  | O20  | 0.38843 | 0.27698 | 0.14866 |
| 21 Co | Co21 | 0.51511 | 0.00011 | 0.20057 |
| 22 Co | Co22 | 0.64012 | 0.16660 | 0.20078 |
| 23 H  | H23  | 0.64410 | 0.05614 | 0.30130 |
| 24 H  | H24  | 0.51330 | 0.11032 | 0.10002 |
| 25 H  | H25  | 0.63819 | 0.27613 | 0.10000 |
| 26 O  | O26  | 0.64199 | 0.05625 | 0.25267 |
| 27 O  | O27  | 0.51397 | 0.11037 | 0.14868 |
| 28 O  | O28  | 0.63843 | 0.27698 | 0.14866 |
| 29 Co | Co29 | 0.76511 | 0.00011 | 0.20057 |
| 30 Co | Co30 | 0.89012 | 0.16660 | 0.20078 |
| 31 H  | H31  | 0.76991 | 0.22372 | 0.30141 |
| 32 H  | H32  | 0.89410 | 0.05614 | 0.30130 |
| 33 H  | H33  | 0.76330 | 0.11032 | 0.10002 |
| 34 H  | H34  | 0.88819 | 0.27613 | 0.10000 |
| 35 O  | O35  | 0.76668 | 0.22308 | 0.25279 |
| 36 O  | O36  | 0.89199 | 0.05625 | 0.25267 |

|       |      |         |         |         |
|-------|------|---------|---------|---------|
| 37 O  | O37  | 0.76397 | 0.11037 | 0.14868 |
| 38 O  | O38  | 0.88843 | 0.27698 | 0.14866 |
| 39 Co | Co39 | 0.01511 | 0.33345 | 0.20057 |
| 40 Co | Co40 | 0.14012 | 0.49993 | 0.20078 |
| 41 H  | H41  | 0.01991 | 0.55705 | 0.30141 |
| 42 H  | H42  | 0.14410 | 0.38947 | 0.30130 |
| 43 H  | H43  | 0.01330 | 0.44366 | 0.10002 |
| 44 H  | H44  | 0.13819 | 0.60947 | 0.10000 |
| 45 O  | O45  | 0.01668 | 0.55642 | 0.25279 |
| 46 O  | O46  | 0.14199 | 0.38958 | 0.25267 |
| 47 O  | O47  | 0.01397 | 0.44371 | 0.14868 |
| 48 O  | O48  | 0.13843 | 0.61032 | 0.14866 |
| 49 Co | Co49 | 0.26511 | 0.33345 | 0.20057 |
| 50 Co | Co50 | 0.39012 | 0.49993 | 0.20078 |
| 51 H  | H51  | 0.26991 | 0.55705 | 0.30141 |
| 52 H  | H52  | 0.26330 | 0.44366 | 0.10002 |
| 53 H  | H53  | 0.38819 | 0.60947 | 0.10000 |
| 54 O  | O54  | 0.26668 | 0.55642 | 0.25279 |
| 55 O  | O55  | 0.26397 | 0.44371 | 0.14868 |
| 56 O  | O56  | 0.38843 | 0.61032 | 0.14866 |
| 57 Co | Co57 | 0.51511 | 0.33345 | 0.20057 |
| 58 Co | Co58 | 0.64012 | 0.49993 | 0.20078 |
| 59 H  | H59  | 0.51991 | 0.55705 | 0.30141 |
| 60 H  | H60  | 0.51330 | 0.44366 | 0.10002 |
| 61 H  | H61  | 0.63819 | 0.60947 | 0.10000 |
| 62 O  | O62  | 0.51668 | 0.55642 | 0.25279 |

|            |         |         |         |
|------------|---------|---------|---------|
| 63 O O63   | 0.51397 | 0.44371 | 0.14868 |
| 64 O O64   | 0.63843 | 0.61032 | 0.14866 |
| 65 Co Co65 | 0.76511 | 0.33345 | 0.20057 |
| 66 Co Co66 | 0.89012 | 0.49993 | 0.20078 |
| 67 H H67   | 0.76991 | 0.55705 | 0.30141 |
| 68 H H68   | 0.76330 | 0.44366 | 0.10002 |
| 69 H H69   | 0.88819 | 0.60947 | 0.10000 |
| 70 O O70   | 0.76668 | 0.55642 | 0.25279 |
| 71 O O71   | 0.76397 | 0.44371 | 0.14868 |
| 72 O O72   | 0.88843 | 0.61032 | 0.14866 |
| 73 Co Co73 | 0.01511 | 0.66678 | 0.20057 |
| 74 Co Co74 | 0.14012 | 0.83327 | 0.20078 |
| 75 H H75   | 0.01991 | 0.89039 | 0.30141 |
| 76 H H76   | 0.14410 | 0.72281 | 0.30130 |
| 77 H H77   | 0.01330 | 0.77699 | 0.10002 |
| 78 H H78   | 0.13819 | 0.94280 | 0.10000 |
| 79 O O79   | 0.01668 | 0.88975 | 0.25279 |
| 80 O O80   | 0.14199 | 0.72292 | 0.25267 |
| 81 O O81   | 0.01397 | 0.77704 | 0.14868 |
| 82 O O82   | 0.13843 | 0.94365 | 0.14866 |
| 83 Co Co83 | 0.26511 | 0.66678 | 0.20057 |
| 84 Co Co84 | 0.39012 | 0.83327 | 0.20078 |
| 85 H H85   | 0.26991 | 0.89039 | 0.30141 |
| 86 H H86   | 0.39410 | 0.72281 | 0.30130 |
| 87 H H87   | 0.26330 | 0.77699 | 0.10002 |
| 88 H H88   | 0.38819 | 0.94280 | 0.10000 |

|              |         |         |         |
|--------------|---------|---------|---------|
| 89 O O89     | 0.26668 | 0.88975 | 0.25279 |
| 90 O O90     | 0.39199 | 0.72292 | 0.25267 |
| 91 O O91     | 0.26397 | 0.77704 | 0.14868 |
| 92 O O92     | 0.38843 | 0.94365 | 0.14866 |
| 93 Co Co93   | 0.51511 | 0.66678 | 0.20057 |
| 94 Co Co94   | 0.64012 | 0.83327 | 0.20078 |
| 95 H H95     | 0.51991 | 0.89039 | 0.30141 |
| 96 H H96     | 0.64410 | 0.72281 | 0.30130 |
| 97 H H97     | 0.51330 | 0.77699 | 0.10002 |
| 98 H H98     | 0.63819 | 0.94280 | 0.10000 |
| 99 O O99     | 0.51668 | 0.88975 | 0.25279 |
| 100 O O100   | 0.64199 | 0.72292 | 0.25267 |
| 101 O O101   | 0.51397 | 0.77704 | 0.14868 |
| 102 O O102   | 0.63843 | 0.94365 | 0.14866 |
| 103 Co Co103 | 0.76511 | 0.66678 | 0.20057 |
| 104 Co Co104 | 0.89012 | 0.83327 | 0.20078 |
| 105 H H105   | 0.76991 | 0.89039 | 0.30141 |
| 106 H H106   | 0.89410 | 0.72281 | 0.30130 |
| 107 H H107   | 0.76330 | 0.77699 | 0.10002 |
| 108 H H108   | 0.88819 | 0.94280 | 0.10000 |
| 109 O O109   | 0.76668 | 0.88975 | 0.25279 |
| 110 O O110   | 0.89199 | 0.72292 | 0.25267 |
| 111 O O111   | 0.76397 | 0.77704 | 0.14868 |
| 112 O O112   | 0.88843 | 0.94365 | 0.14866 |
| 113 O O113   | 0.51208 | 0.33321 | 0.29089 |

**Co(OH)<sub>2</sub>-Low Spin-\*OOH**

|    |         | <i>x</i> | <i>y</i> | <i>z</i> |
|----|---------|----------|----------|----------|
| 1  | Co Co1  | 0.01511  | 0.00011  | 0.20057  |
| 2  | Co Co2  | 0.14012  | 0.16660  | 0.20078  |
| 3  | H H3    | 0.01991  | 0.22372  | 0.30141  |
| 4  | H H4    | 0.14410  | 0.05614  | 0.30130  |
| 5  | H H5    | 0.01330  | 0.11032  | 0.10002  |
| 6  | H H6    | 0.13819  | 0.27613  | 0.10000  |
| 7  | O O7    | 0.01668  | 0.22308  | 0.25279  |
| 8  | O O8    | 0.14199  | 0.05625  | 0.25267  |
| 9  | O O9    | 0.01397  | 0.11037  | 0.14868  |
| 10 | O O10   | 0.13843  | 0.27698  | 0.14866  |
| 11 | Co Co11 | 0.26511  | 0.00011  | 0.20057  |
| 12 | Co Co12 | 0.39012  | 0.16660  | 0.20078  |
| 13 | H H13   | 0.26991  | 0.22372  | 0.30141  |
| 14 | H H14   | 0.39410  | 0.05614  | 0.30130  |
| 15 | H H15   | 0.26330  | 0.11032  | 0.10002  |
| 16 | H H16   | 0.38819  | 0.27613  | 0.10000  |
| 17 | O O17   | 0.26668  | 0.22308  | 0.25279  |
| 18 | O O18   | 0.39199  | 0.05625  | 0.25267  |
| 19 | O O19   | 0.26397  | 0.11037  | 0.14868  |
| 20 | O O20   | 0.38843  | 0.27698  | 0.14866  |
| 21 | Co Co21 | 0.51511  | 0.00011  | 0.20057  |
| 22 | Co Co22 | 0.64012  | 0.16660  | 0.20078  |
| 23 | H H23   | 0.64410  | 0.05614  | 0.30130  |
| 24 | H H24   | 0.51330  | 0.11032  | 0.10002  |

|            |         |         |         |
|------------|---------|---------|---------|
| 25 H H25   | 0.63819 | 0.27613 | 0.10000 |
| 26 O O26   | 0.64199 | 0.05625 | 0.25267 |
| 27 O O27   | 0.51397 | 0.11037 | 0.14868 |
| 28 O O28   | 0.63843 | 0.27698 | 0.14866 |
| 29 Co Co29 | 0.76511 | 0.00011 | 0.20057 |
| 30 Co Co30 | 0.89012 | 0.16660 | 0.20078 |
| 31 H H31   | 0.76991 | 0.22372 | 0.30141 |
| 32 H H32   | 0.89410 | 0.05614 | 0.30130 |
| 33 H H33   | 0.76330 | 0.11032 | 0.10002 |
| 34 H H34   | 0.88819 | 0.27613 | 0.10000 |
| 35 O O35   | 0.76668 | 0.22308 | 0.25279 |
| 36 O O36   | 0.89199 | 0.05625 | 0.25267 |
| 37 O O37   | 0.76397 | 0.11037 | 0.14868 |
| 38 O O38   | 0.88843 | 0.27698 | 0.14866 |
| 39 Co Co39 | 0.01511 | 0.33345 | 0.20057 |
| 40 Co Co40 | 0.14012 | 0.49993 | 0.20078 |
| 41 H H41   | 0.01991 | 0.55705 | 0.30141 |
| 42 H H42   | 0.14410 | 0.38947 | 0.30130 |
| 43 H H43   | 0.01330 | 0.44366 | 0.10002 |
| 44 H H44   | 0.13819 | 0.60947 | 0.10000 |
| 45 O O45   | 0.01668 | 0.55642 | 0.25279 |
| 46 O O46   | 0.14199 | 0.38958 | 0.25267 |
| 47 O O47   | 0.01397 | 0.44371 | 0.14868 |
| 48 O O48   | 0.13843 | 0.61032 | 0.14866 |
| 49 Co Co49 | 0.26511 | 0.33345 | 0.20057 |
| 50 Co Co50 | 0.39012 | 0.49993 | 0.20078 |

|       |      |         |         |         |
|-------|------|---------|---------|---------|
| 51 H  | H51  | 0.26991 | 0.55705 | 0.30141 |
| 52 H  | H52  | 0.26330 | 0.44366 | 0.10002 |
| 53 H  | H53  | 0.38819 | 0.60947 | 0.10000 |
| 54 O  | O54  | 0.26668 | 0.55642 | 0.25279 |
| 55 O  | O55  | 0.26397 | 0.44371 | 0.14868 |
| 56 O  | O56  | 0.38843 | 0.61032 | 0.14866 |
| 57 Co | Co57 | 0.51511 | 0.33345 | 0.20057 |
| 58 Co | Co58 | 0.64012 | 0.49993 | 0.20078 |
| 59 H  | H59  | 0.51991 | 0.55705 | 0.30141 |
| 60 H  | H60  | 0.51330 | 0.44366 | 0.10002 |
| 61 H  | H61  | 0.63819 | 0.60947 | 0.10000 |
| 62 O  | O62  | 0.51668 | 0.55642 | 0.25279 |
| 63 O  | O63  | 0.51397 | 0.44371 | 0.14868 |
| 64 O  | O64  | 0.63843 | 0.61032 | 0.14866 |
| 65 Co | Co65 | 0.76511 | 0.33345 | 0.20057 |
| 66 Co | Co66 | 0.89012 | 0.49993 | 0.20078 |
| 67 H  | H67  | 0.76991 | 0.55705 | 0.30141 |
| 68 H  | H68  | 0.76330 | 0.44366 | 0.10002 |
| 69 H  | H69  | 0.88819 | 0.60947 | 0.10000 |
| 70 O  | O70  | 0.76668 | 0.55642 | 0.25279 |
| 71 O  | O71  | 0.76397 | 0.44371 | 0.14868 |
| 72 O  | O72  | 0.88843 | 0.61032 | 0.14866 |
| 73 Co | Co73 | 0.01511 | 0.66678 | 0.20057 |
| 74 Co | Co74 | 0.14012 | 0.83327 | 0.20078 |
| 75 H  | H75  | 0.01991 | 0.89039 | 0.30141 |
| 76 H  | H76  | 0.14410 | 0.72281 | 0.30130 |

|       |      |         |         |         |
|-------|------|---------|---------|---------|
| 77 H  | H77  | 0.01330 | 0.77699 | 0.10002 |
| 78 H  | H78  | 0.13819 | 0.94280 | 0.10000 |
| 79 O  | O79  | 0.01668 | 0.88975 | 0.25279 |
| 80 O  | O80  | 0.14199 | 0.72292 | 0.25267 |
| 81 O  | O81  | 0.01397 | 0.77704 | 0.14868 |
| 82 O  | O82  | 0.13843 | 0.94365 | 0.14866 |
| 83 Co | Co83 | 0.26511 | 0.66678 | 0.20057 |
| 84 Co | Co84 | 0.39012 | 0.83327 | 0.20078 |
| 85 H  | H85  | 0.26991 | 0.89039 | 0.30141 |
| 86 H  | H86  | 0.39410 | 0.72281 | 0.30130 |
| 87 H  | H87  | 0.26330 | 0.77699 | 0.10002 |
| 88 H  | H88  | 0.38819 | 0.94280 | 0.10000 |
| 89 O  | O89  | 0.26668 | 0.88975 | 0.25279 |
| 90 O  | O90  | 0.39199 | 0.72292 | 0.25267 |
| 91 O  | O91  | 0.26397 | 0.77704 | 0.14868 |
| 92 O  | O92  | 0.38843 | 0.94365 | 0.14866 |
| 93 Co | Co93 | 0.51511 | 0.66678 | 0.20057 |
| 94 Co | Co94 | 0.64012 | 0.83327 | 0.20078 |
| 95 H  | H95  | 0.51991 | 0.89039 | 0.30141 |
| 96 H  | H96  | 0.64410 | 0.72281 | 0.30130 |
| 97 H  | H97  | 0.51330 | 0.77699 | 0.10002 |
| 98 H  | H98  | 0.63819 | 0.94280 | 0.10000 |
| 99 O  | O99  | 0.51668 | 0.88975 | 0.25279 |
| 100 O | O100 | 0.64199 | 0.72292 | 0.25267 |
| 101 O | O101 | 0.51397 | 0.77704 | 0.14868 |
| 102 O | O102 | 0.63843 | 0.94365 | 0.14866 |

|     |    |       |         |         |         |
|-----|----|-------|---------|---------|---------|
| 103 | Co | Co103 | 0.76511 | 0.66678 | 0.20057 |
| 104 | Co | Co104 | 0.89012 | 0.83327 | 0.20078 |
| 105 | H  | H105  | 0.76991 | 0.89039 | 0.30141 |
| 106 | H  | H106  | 0.89410 | 0.72281 | 0.30130 |
| 107 | H  | H107  | 0.76330 | 0.77699 | 0.10002 |
| 108 | H  | H108  | 0.88819 | 0.94280 | 0.10000 |
| 109 | O  | O109  | 0.76668 | 0.88975 | 0.25279 |
| 110 | O  | O110  | 0.89199 | 0.72292 | 0.25267 |
| 111 | O  | O111  | 0.76397 | 0.77704 | 0.14868 |
| 112 | O  | O112  | 0.88843 | 0.94365 | 0.14866 |
| 113 | O  | O113  | 0.51208 | 0.33321 | 0.29089 |
| 114 | O  | O114  | 0.51522 | 0.31156 | 0.36263 |
| 115 | H  | H115  | 0.51005 | 0.34471 | 0.41067 |

**Co(OH)<sub>2</sub>-Low Spin-\*O<sub>2</sub>**

|    |    |     | <i>x</i> | <i>y</i> | <i>z</i> |
|----|----|-----|----------|----------|----------|
| 1  | Co | Co1 | 0.01511  | 0.00011  | 0.20057  |
| 2  | Co | Co2 | 0.14012  | 0.16660  | 0.20078  |
| 3  | H  | H3  | 0.01991  | 0.22372  | 0.30141  |
| 4  | H  | H4  | 0.14410  | 0.05614  | 0.30130  |
| 5  | H  | H5  | 0.01330  | 0.11032  | 0.10002  |
| 6  | H  | H6  | 0.13819  | 0.27613  | 0.10000  |
| 7  | O  | O7  | 0.01668  | 0.22308  | 0.25279  |
| 8  | O  | O8  | 0.14199  | 0.05625  | 0.25267  |
| 9  | O  | O9  | 0.01397  | 0.11037  | 0.14868  |
| 10 | O  | O10 | 0.13843  | 0.27698  | 0.14866  |

|       |      |         |         |         |
|-------|------|---------|---------|---------|
| 11 Co | Co11 | 0.26511 | 0.00011 | 0.20057 |
| 12 Co | Co12 | 0.39012 | 0.16660 | 0.20078 |
| 13 H  | H13  | 0.26991 | 0.22372 | 0.30141 |
| 14 H  | H14  | 0.39410 | 0.05614 | 0.30130 |
| 15 H  | H15  | 0.26330 | 0.11032 | 0.10002 |
| 16 H  | H16  | 0.38819 | 0.27613 | 0.10000 |
| 17 O  | O17  | 0.26668 | 0.22308 | 0.25279 |
| 18 O  | O18  | 0.39199 | 0.05625 | 0.25267 |
| 19 O  | O19  | 0.26397 | 0.11037 | 0.14868 |
| 20 O  | O20  | 0.38843 | 0.27698 | 0.14866 |
| 21 Co | Co21 | 0.51511 | 0.00011 | 0.20057 |
| 22 Co | Co22 | 0.64012 | 0.16660 | 0.20078 |
| 23 H  | H23  | 0.64410 | 0.05614 | 0.30130 |
| 24 H  | H24  | 0.51330 | 0.11032 | 0.10002 |
| 25 H  | H25  | 0.63819 | 0.27613 | 0.10000 |
| 26 O  | O26  | 0.64199 | 0.05625 | 0.25267 |
| 27 O  | O27  | 0.51397 | 0.11037 | 0.14868 |
| 28 O  | O28  | 0.63843 | 0.27698 | 0.14866 |
| 29 Co | Co29 | 0.76511 | 0.00011 | 0.20057 |
| 30 Co | Co30 | 0.89012 | 0.16660 | 0.20078 |
| 31 H  | H31  | 0.76991 | 0.22372 | 0.30141 |
| 32 H  | H32  | 0.89410 | 0.05614 | 0.30130 |
| 33 H  | H33  | 0.76330 | 0.11032 | 0.10002 |
| 34 H  | H34  | 0.88819 | 0.27613 | 0.10000 |
| 35 O  | O35  | 0.76668 | 0.22308 | 0.25279 |
| 36 O  | O36  | 0.89199 | 0.05625 | 0.25267 |

|            |         |         |         |
|------------|---------|---------|---------|
| 37 O O37   | 0.76397 | 0.11037 | 0.14868 |
| 38 O O38   | 0.88843 | 0.27698 | 0.14866 |
| 39 Co Co39 | 0.01511 | 0.33345 | 0.20057 |
| 40 Co Co40 | 0.14012 | 0.49993 | 0.20078 |
| 41 H H41   | 0.01991 | 0.55705 | 0.30141 |
| 42 H H42   | 0.14410 | 0.38947 | 0.30130 |
| 43 H H43   | 0.01330 | 0.44366 | 0.10002 |
| 44 H H44   | 0.13819 | 0.60947 | 0.10000 |
| 45 O O45   | 0.01668 | 0.55642 | 0.25279 |
| 46 O O46   | 0.14199 | 0.38958 | 0.25267 |
| 47 O O47   | 0.01397 | 0.44371 | 0.14868 |
| 48 O O48   | 0.13843 | 0.61032 | 0.14866 |
| 49 Co Co49 | 0.26511 | 0.33345 | 0.20057 |
| 50 Co Co50 | 0.39012 | 0.49993 | 0.20078 |
| 51 H H51   | 0.26991 | 0.55705 | 0.30141 |
| 52 H H52   | 0.26330 | 0.44366 | 0.10002 |
| 53 H H53   | 0.38819 | 0.60947 | 0.10000 |
| 54 O O54   | 0.26668 | 0.55642 | 0.25279 |
| 55 O O55   | 0.26397 | 0.44371 | 0.14868 |
| 56 O O56   | 0.38843 | 0.61032 | 0.14866 |
| 57 Co Co57 | 0.51511 | 0.33345 | 0.20057 |
| 58 Co Co58 | 0.64012 | 0.49993 | 0.20078 |
| 59 H H59   | 0.51991 | 0.55705 | 0.30141 |
| 60 H H60   | 0.51330 | 0.44366 | 0.10002 |
| 61 H H61   | 0.63819 | 0.60947 | 0.10000 |
| 62 O O62   | 0.51668 | 0.55642 | 0.25279 |

|            |         |         |         |
|------------|---------|---------|---------|
| 63 O O63   | 0.51397 | 0.44371 | 0.14868 |
| 64 O O64   | 0.63843 | 0.61032 | 0.14866 |
| 65 Co Co65 | 0.76511 | 0.33345 | 0.20057 |
| 66 Co Co66 | 0.89012 | 0.49993 | 0.20078 |
| 67 H H67   | 0.76991 | 0.55705 | 0.30141 |
| 68 H H68   | 0.76330 | 0.44366 | 0.10002 |
| 69 H H69   | 0.88819 | 0.60947 | 0.10000 |
| 70 O O70   | 0.76668 | 0.55642 | 0.25279 |
| 71 O O71   | 0.76397 | 0.44371 | 0.14868 |
| 72 O O72   | 0.88843 | 0.61032 | 0.14866 |
| 73 Co Co73 | 0.01511 | 0.66678 | 0.20057 |
| 74 Co Co74 | 0.14012 | 0.83327 | 0.20078 |
| 75 H H75   | 0.01991 | 0.89039 | 0.30141 |
| 76 H H76   | 0.14410 | 0.72281 | 0.30130 |
| 77 H H77   | 0.01330 | 0.77699 | 0.10002 |
| 78 H H78   | 0.13819 | 0.94280 | 0.10000 |
| 79 O O79   | 0.01668 | 0.88975 | 0.25279 |
| 80 O O80   | 0.14199 | 0.72292 | 0.25267 |
| 81 O O81   | 0.01397 | 0.77704 | 0.14868 |
| 82 O O82   | 0.13843 | 0.94365 | 0.14866 |
| 83 Co Co83 | 0.26511 | 0.66678 | 0.20057 |
| 84 Co Co84 | 0.39012 | 0.83327 | 0.20078 |
| 85 H H85   | 0.26991 | 0.89039 | 0.30141 |
| 86 H H86   | 0.39410 | 0.72281 | 0.30130 |
| 87 H H87   | 0.26330 | 0.77699 | 0.10002 |
| 88 H H88   | 0.38819 | 0.94280 | 0.10000 |

|              |         |         |         |
|--------------|---------|---------|---------|
| 89 O O89     | 0.26668 | 0.88975 | 0.25279 |
| 90 O O90     | 0.39199 | 0.72292 | 0.25267 |
| 91 O O91     | 0.26397 | 0.77704 | 0.14868 |
| 92 O O92     | 0.38843 | 0.94365 | 0.14866 |
| 93 Co Co93   | 0.51511 | 0.66678 | 0.20057 |
| 94 Co Co94   | 0.64012 | 0.83327 | 0.20078 |
| 95 H H95     | 0.51991 | 0.89039 | 0.30141 |
| 96 H H96     | 0.64410 | 0.72281 | 0.30130 |
| 97 H H97     | 0.51330 | 0.77699 | 0.10002 |
| 98 H H98     | 0.63819 | 0.94280 | 0.10000 |
| 99 O O99     | 0.51668 | 0.88975 | 0.25279 |
| 100 O O100   | 0.64199 | 0.72292 | 0.25267 |
| 101 O O101   | 0.51397 | 0.77704 | 0.14868 |
| 102 O O102   | 0.63843 | 0.94365 | 0.14866 |
| 103 Co Co103 | 0.76511 | 0.66678 | 0.20057 |
| 104 Co Co104 | 0.89012 | 0.83327 | 0.20078 |
| 105 H H105   | 0.76991 | 0.89039 | 0.30141 |
| 106 H H106   | 0.89410 | 0.72281 | 0.30130 |
| 107 H H107   | 0.76330 | 0.77699 | 0.10002 |
| 108 H H108   | 0.88819 | 0.94280 | 0.10000 |
| 109 O O109   | 0.76668 | 0.88975 | 0.25279 |
| 110 O O110   | 0.89199 | 0.72292 | 0.25267 |
| 111 O O111   | 0.76397 | 0.77704 | 0.14868 |
| 112 O O112   | 0.88843 | 0.94365 | 0.14866 |
| 113 O O113   | 0.51208 | 0.33321 | 0.29089 |
| 114 O O114   | 0.51522 | 0.31156 | 0.36263 |

**Co(OH)<sub>2</sub>-Low Spin-<sup>+</sup>O<sub>2</sub>**

|            | <i>x</i> | <i>y</i> | <i>z</i> |
|------------|----------|----------|----------|
| 1 Co Co1   | 0.01511  | 0.00011  | 0.20057  |
| 2 Co Co2   | 0.14012  | 0.16660  | 0.20078  |
| 3 H H3     | 0.01991  | 0.22372  | 0.30141  |
| 4 H H4     | 0.14410  | 0.05614  | 0.30130  |
| 5 H H5     | 0.01330  | 0.11032  | 0.10002  |
| 6 H H6     | 0.13819  | 0.27613  | 0.10000  |
| 7 O O7     | 0.01668  | 0.22308  | 0.25279  |
| 8 O O8     | 0.14199  | 0.05625  | 0.25267  |
| 9 O O9     | 0.01397  | 0.11037  | 0.14868  |
| 10 O O10   | 0.13843  | 0.27698  | 0.14866  |
| 11 Co Co11 | 0.26511  | 0.00011  | 0.20057  |
| 12 Co Co12 | 0.39012  | 0.16660  | 0.20078  |
| 13 H H13   | 0.26991  | 0.22372  | 0.30141  |
| 14 H H14   | 0.39410  | 0.05614  | 0.30130  |
| 15 H H15   | 0.26330  | 0.11032  | 0.10002  |
| 16 H H16   | 0.38819  | 0.27613  | 0.10000  |
| 17 O O17   | 0.26668  | 0.22308  | 0.25279  |
| 18 O O18   | 0.39199  | 0.05625  | 0.25267  |
| 19 O O19   | 0.26397  | 0.11037  | 0.14868  |
| 20 O O20   | 0.38843  | 0.27698  | 0.14866  |
| 21 Co Co21 | 0.51511  | 0.00011  | 0.20057  |
| 22 Co Co22 | 0.64012  | 0.16660  | 0.20078  |
| 23 H H23   | 0.64410  | 0.05614  | 0.30130  |

|       |      |         |         |         |
|-------|------|---------|---------|---------|
| 24 H  | H24  | 0.51330 | 0.11032 | 0.10002 |
| 25 H  | H25  | 0.63819 | 0.27613 | 0.10000 |
| 26 O  | O26  | 0.64199 | 0.05625 | 0.25267 |
| 27 O  | O27  | 0.51397 | 0.11037 | 0.14868 |
| 28 O  | O28  | 0.63843 | 0.27698 | 0.14866 |
| 29 Co | Co29 | 0.76511 | 0.00011 | 0.20057 |
| 30 Co | Co30 | 0.89012 | 0.16660 | 0.20078 |
| 31 H  | H31  | 0.76991 | 0.22372 | 0.30141 |
| 32 H  | H32  | 0.89410 | 0.05614 | 0.30130 |
| 33 H  | H33  | 0.76330 | 0.11032 | 0.10002 |
| 34 H  | H34  | 0.88819 | 0.27613 | 0.10000 |
| 35 O  | O35  | 0.76668 | 0.22308 | 0.25279 |
| 36 O  | O36  | 0.89199 | 0.05625 | 0.25267 |
| 37 O  | O37  | 0.76397 | 0.11037 | 0.14868 |
| 38 O  | O38  | 0.88843 | 0.27698 | 0.14866 |
| 39 Co | Co39 | 0.01511 | 0.33345 | 0.20057 |
| 40 Co | Co40 | 0.14012 | 0.49993 | 0.20078 |
| 41 H  | H41  | 0.01991 | 0.55705 | 0.30141 |
| 42 H  | H42  | 0.14410 | 0.38947 | 0.30130 |
| 43 H  | H43  | 0.01330 | 0.44366 | 0.10002 |
| 44 H  | H44  | 0.13819 | 0.60947 | 0.10000 |
| 45 O  | O45  | 0.01668 | 0.55642 | 0.25279 |
| 46 O  | O46  | 0.14199 | 0.38958 | 0.25267 |
| 47 O  | O47  | 0.01397 | 0.44371 | 0.14868 |
| 48 O  | O48  | 0.13843 | 0.61032 | 0.14866 |
| 49 Co | Co49 | 0.26511 | 0.33345 | 0.20057 |

|            |         |         |         |
|------------|---------|---------|---------|
| 50 Co Co50 | 0.39012 | 0.49993 | 0.20078 |
| 51 H H51   | 0.26991 | 0.55705 | 0.30141 |
| 52 H H52   | 0.26330 | 0.44366 | 0.10002 |
| 53 H H53   | 0.38819 | 0.60947 | 0.10000 |
| 54 O O54   | 0.26668 | 0.55642 | 0.25279 |
| 55 O O55   | 0.26397 | 0.44371 | 0.14868 |
| 56 O O56   | 0.38843 | 0.61032 | 0.14866 |
| 57 Co Co57 | 0.51511 | 0.33345 | 0.20057 |
| 58 Co Co58 | 0.64012 | 0.49993 | 0.20078 |
| 59 H H59   | 0.51991 | 0.55705 | 0.30141 |
| 60 H H60   | 0.51330 | 0.44366 | 0.10002 |
| 61 H H61   | 0.63819 | 0.60947 | 0.10000 |
| 62 O O62   | 0.51668 | 0.55642 | 0.25279 |
| 63 O O63   | 0.51397 | 0.44371 | 0.14868 |
| 64 O O64   | 0.63843 | 0.61032 | 0.14866 |
| 65 Co Co65 | 0.76511 | 0.33345 | 0.20057 |
| 66 Co Co66 | 0.89012 | 0.49993 | 0.20078 |
| 67 H H67   | 0.76991 | 0.55705 | 0.30141 |
| 68 H H68   | 0.76330 | 0.44366 | 0.10002 |
| 69 H H69   | 0.88819 | 0.60947 | 0.10000 |
| 70 O O70   | 0.76668 | 0.55642 | 0.25279 |
| 71 O O71   | 0.76397 | 0.44371 | 0.14868 |
| 72 O O72   | 0.88843 | 0.61032 | 0.14866 |
| 73 Co Co73 | 0.01511 | 0.66678 | 0.20057 |
| 74 Co Co74 | 0.14012 | 0.83327 | 0.20078 |
| 75 H H75   | 0.01991 | 0.89039 | 0.30141 |

|       |      |         |         |         |
|-------|------|---------|---------|---------|
| 76 H  | H76  | 0.14410 | 0.72281 | 0.30130 |
| 77 H  | H77  | 0.01330 | 0.77699 | 0.10002 |
| 78 H  | H78  | 0.13819 | 0.94280 | 0.10000 |
| 79 O  | O79  | 0.01668 | 0.88975 | 0.25279 |
| 80 O  | O80  | 0.14199 | 0.72292 | 0.25267 |
| 81 O  | O81  | 0.01397 | 0.77704 | 0.14868 |
| 82 O  | O82  | 0.13843 | 0.94365 | 0.14866 |
| 83 Co | Co83 | 0.26511 | 0.66678 | 0.20057 |
| 84 Co | Co84 | 0.39012 | 0.83327 | 0.20078 |
| 85 H  | H85  | 0.26991 | 0.89039 | 0.30141 |
| 86 H  | H86  | 0.39410 | 0.72281 | 0.30130 |
| 87 H  | H87  | 0.26330 | 0.77699 | 0.10002 |
| 88 H  | H88  | 0.38819 | 0.94280 | 0.10000 |
| 89 O  | O89  | 0.26668 | 0.88975 | 0.25279 |
| 90 O  | O90  | 0.39199 | 0.72292 | 0.25267 |
| 91 O  | O91  | 0.26397 | 0.77704 | 0.14868 |
| 92 O  | O92  | 0.38843 | 0.94365 | 0.14866 |
| 93 Co | Co93 | 0.51511 | 0.66678 | 0.20057 |
| 94 Co | Co94 | 0.64012 | 0.83327 | 0.20078 |
| 95 H  | H95  | 0.51991 | 0.89039 | 0.30141 |
| 96 H  | H96  | 0.64410 | 0.72281 | 0.30130 |
| 97 H  | H97  | 0.51330 | 0.77699 | 0.10002 |
| 98 H  | H98  | 0.63819 | 0.94280 | 0.10000 |
| 99 O  | O99  | 0.51668 | 0.88975 | 0.25279 |
| 100 O | O100 | 0.64199 | 0.72292 | 0.25267 |
| 101 O | O101 | 0.51397 | 0.77704 | 0.14868 |

|     |    |       |         |         |         |
|-----|----|-------|---------|---------|---------|
| 102 | O  | O102  | 0.63843 | 0.94365 | 0.14866 |
| 103 | Co | Co103 | 0.76511 | 0.66678 | 0.20057 |
| 104 | Co | Co104 | 0.89012 | 0.83327 | 0.20078 |
| 105 | H  | H105  | 0.76991 | 0.89039 | 0.30141 |
| 106 | H  | H106  | 0.89410 | 0.72281 | 0.30130 |
| 107 | H  | H107  | 0.76330 | 0.77699 | 0.10002 |
| 108 | H  | H108  | 0.88819 | 0.94280 | 0.10000 |
| 109 | O  | O109  | 0.76668 | 0.88975 | 0.25279 |
| 110 | O  | O110  | 0.89199 | 0.72292 | 0.25267 |
| 111 | O  | O111  | 0.76397 | 0.77704 | 0.14868 |
| 112 | O  | O112  | 0.88843 | 0.94365 | 0.14866 |
| 113 | O  | O113  | 0.51168 | 0.33381 | 0.32089 |
| 114 | O  | O114  | 0.51482 | 0.31217 | 0.39263 |

**Co(OH)<sub>2</sub>-Low Spin-\*H<sub>2</sub>O<sub>2</sub>**

|    |    |     | <i>x</i> | <i>y</i> | <i>z</i> |
|----|----|-----|----------|----------|----------|
| 1  | Co | Co1 | 0.01511  | 0.00011  | 0.20057  |
| 2  | Co | Co2 | 0.14012  | 0.16660  | 0.20078  |
| 3  | H  | H3  | 0.01991  | 0.22372  | 0.30141  |
| 4  | H  | H4  | 0.14410  | 0.05614  | 0.30130  |
| 5  | H  | H5  | 0.01330  | 0.11032  | 0.10002  |
| 6  | H  | H6  | 0.13819  | 0.27613  | 0.10000  |
| 7  | O  | O7  | 0.01668  | 0.22308  | 0.25279  |
| 8  | O  | O8  | 0.14199  | 0.05625  | 0.25267  |
| 9  | O  | O9  | 0.01397  | 0.11037  | 0.14868  |
| 10 | O  | O10 | 0.13843  | 0.27698  | 0.14866  |

|            |         |         |         |
|------------|---------|---------|---------|
| 11 Co Co11 | 0.26511 | 0.00011 | 0.20057 |
| 12 Co Co12 | 0.39012 | 0.16660 | 0.20078 |
| 13 H H13   | 0.26991 | 0.22372 | 0.30141 |
| 14 H H14   | 0.39410 | 0.05614 | 0.30130 |
| 15 H H15   | 0.26330 | 0.11032 | 0.10002 |
| 16 H H16   | 0.38819 | 0.27613 | 0.10000 |
| 17 O O17   | 0.26668 | 0.22308 | 0.25279 |
| 18 O O18   | 0.39199 | 0.05625 | 0.25267 |
| 19 O O19   | 0.26397 | 0.11037 | 0.14868 |
| 20 O O20   | 0.38843 | 0.27698 | 0.14866 |
| 21 Co Co21 | 0.51511 | 0.00011 | 0.20057 |
| 22 Co Co22 | 0.64012 | 0.16660 | 0.20078 |
| 23 H H23   | 0.64410 | 0.05614 | 0.30130 |
| 24 H H24   | 0.51330 | 0.11032 | 0.10002 |
| 25 H H25   | 0.63819 | 0.27613 | 0.10000 |
| 26 O O26   | 0.64199 | 0.05625 | 0.25267 |
| 27 O O27   | 0.51397 | 0.11037 | 0.14868 |
| 28 O O28   | 0.63843 | 0.27698 | 0.14866 |
| 29 Co Co29 | 0.76511 | 0.00011 | 0.20057 |
| 30 Co Co30 | 0.89012 | 0.16660 | 0.20078 |
| 31 H H31   | 0.76991 | 0.22372 | 0.30141 |
| 32 H H32   | 0.89410 | 0.05614 | 0.30130 |
| 33 H H33   | 0.76330 | 0.11032 | 0.10002 |
| 34 H H34   | 0.88819 | 0.27613 | 0.10000 |
| 35 O O35   | 0.76668 | 0.22308 | 0.25279 |
| 36 O O36   | 0.89199 | 0.05625 | 0.25267 |

|            |         |         |         |
|------------|---------|---------|---------|
| 37 O O37   | 0.76397 | 0.11037 | 0.14868 |
| 38 O O38   | 0.88843 | 0.27698 | 0.14866 |
| 39 Co Co39 | 0.01511 | 0.33345 | 0.20057 |
| 40 Co Co40 | 0.14012 | 0.49993 | 0.20078 |
| 41 H H41   | 0.01991 | 0.55705 | 0.30141 |
| 42 H H42   | 0.14410 | 0.38947 | 0.30130 |
| 43 H H43   | 0.01330 | 0.44366 | 0.10002 |
| 44 H H44   | 0.13819 | 0.60947 | 0.10000 |
| 45 O O45   | 0.01668 | 0.55642 | 0.25279 |
| 46 O O46   | 0.14199 | 0.38958 | 0.25267 |
| 47 O O47   | 0.01397 | 0.44371 | 0.14868 |
| 48 O O48   | 0.13843 | 0.61032 | 0.14866 |
| 49 Co Co49 | 0.26511 | 0.33345 | 0.20057 |
| 50 Co Co50 | 0.39012 | 0.49993 | 0.20078 |
| 51 H H51   | 0.26991 | 0.55705 | 0.30141 |
| 52 H H52   | 0.26330 | 0.44366 | 0.10002 |
| 53 H H53   | 0.38819 | 0.60947 | 0.10000 |
| 54 O O54   | 0.26668 | 0.55642 | 0.25279 |
| 55 O O55   | 0.26397 | 0.44371 | 0.14868 |
| 56 O O56   | 0.38843 | 0.61032 | 0.14866 |
| 57 Co Co57 | 0.51511 | 0.33345 | 0.20057 |
| 58 Co Co58 | 0.64012 | 0.49993 | 0.20078 |
| 59 H H59   | 0.51991 | 0.55705 | 0.30141 |
| 60 H H60   | 0.51330 | 0.44366 | 0.10002 |
| 61 H H61   | 0.63819 | 0.60947 | 0.10000 |
| 62 O O62   | 0.51668 | 0.55642 | 0.25279 |

|            |         |         |         |
|------------|---------|---------|---------|
| 63 O O63   | 0.51397 | 0.44371 | 0.14868 |
| 64 O O64   | 0.63843 | 0.61032 | 0.14866 |
| 65 Co Co65 | 0.76511 | 0.33345 | 0.20057 |
| 66 Co Co66 | 0.89012 | 0.49993 | 0.20078 |
| 67 H H67   | 0.76991 | 0.55705 | 0.30141 |
| 68 H H68   | 0.76330 | 0.44366 | 0.10002 |
| 69 H H69   | 0.88819 | 0.60947 | 0.10000 |
| 70 O O70   | 0.76668 | 0.55642 | 0.25279 |
| 71 O O71   | 0.76397 | 0.44371 | 0.14868 |
| 72 O O72   | 0.88843 | 0.61032 | 0.14866 |
| 73 Co Co73 | 0.01511 | 0.66678 | 0.20057 |
| 74 Co Co74 | 0.14012 | 0.83327 | 0.20078 |
| 75 H H75   | 0.01991 | 0.89039 | 0.30141 |
| 76 H H76   | 0.14410 | 0.72281 | 0.30130 |
| 77 H H77   | 0.01330 | 0.77699 | 0.10002 |
| 78 H H78   | 0.13819 | 0.94280 | 0.10000 |
| 79 O O79   | 0.01668 | 0.88975 | 0.25279 |
| 80 O O80   | 0.14199 | 0.72292 | 0.25267 |
| 81 O O81   | 0.01397 | 0.77704 | 0.14868 |
| 82 O O82   | 0.13843 | 0.94365 | 0.14866 |
| 83 Co Co83 | 0.26511 | 0.66678 | 0.20057 |
| 84 Co Co84 | 0.39012 | 0.83327 | 0.20078 |
| 85 H H85   | 0.26991 | 0.89039 | 0.30141 |
| 86 H H86   | 0.39410 | 0.72281 | 0.30130 |
| 87 H H87   | 0.26330 | 0.77699 | 0.10002 |
| 88 H H88   | 0.38819 | 0.94280 | 0.10000 |

|              |         |         |         |
|--------------|---------|---------|---------|
| 89 O O89     | 0.26668 | 0.88975 | 0.25279 |
| 90 O O90     | 0.39199 | 0.72292 | 0.25267 |
| 91 O O91     | 0.26397 | 0.77704 | 0.14868 |
| 92 O O92     | 0.38843 | 0.94365 | 0.14866 |
| 93 Co Co93   | 0.51511 | 0.66678 | 0.20057 |
| 94 Co Co94   | 0.64012 | 0.83327 | 0.20078 |
| 95 H H95     | 0.51991 | 0.89039 | 0.30141 |
| 96 H H96     | 0.64410 | 0.72281 | 0.30130 |
| 97 H H97     | 0.51330 | 0.77699 | 0.10002 |
| 98 H H98     | 0.63819 | 0.94280 | 0.10000 |
| 99 O O99     | 0.51668 | 0.88975 | 0.25279 |
| 100 O O100   | 0.64199 | 0.72292 | 0.25267 |
| 101 O O101   | 0.51397 | 0.77704 | 0.14868 |
| 102 O O102   | 0.63843 | 0.94365 | 0.14866 |
| 103 Co Co103 | 0.76511 | 0.66678 | 0.20057 |
| 104 Co Co104 | 0.89012 | 0.83327 | 0.20078 |
| 105 H H105   | 0.76991 | 0.89039 | 0.30141 |
| 106 H H106   | 0.89410 | 0.72281 | 0.30130 |
| 107 H H107   | 0.76330 | 0.77699 | 0.10002 |
| 108 H H108   | 0.88819 | 0.94280 | 0.10000 |
| 109 O O109   | 0.76668 | 0.88975 | 0.25279 |
| 110 O O110   | 0.89199 | 0.72292 | 0.25267 |
| 111 O O111   | 0.76397 | 0.77704 | 0.14868 |
| 112 O O112   | 0.88843 | 0.94365 | 0.14866 |
| 113 O O113   | 0.50718 | 0.26796 | 0.33697 |
| 114 O O114   | 0.51035 | 0.33784 | 0.29137 |

|     |   |      |         |         |         |
|-----|---|------|---------|---------|---------|
| 115 | H | H115 | 0.48045 | 0.39179 | 0.31778 |
| 116 | H | H116 | 0.53707 | 0.21400 | 0.31056 |

**Co(OH)<sub>2</sub>-Low Spin-\*+H<sub>2</sub>O<sub>2</sub>**

|    |    |      | <i>x</i> | <i>y</i> | <i>z</i> |
|----|----|------|----------|----------|----------|
| 1  | Co | Co1  | 0.01511  | 0.00011  | 0.20057  |
| 2  | Co | Co2  | 0.14012  | 0.16660  | 0.20078  |
| 3  | H  | H3   | 0.01991  | 0.22372  | 0.30141  |
| 4  | H  | H4   | 0.14410  | 0.05614  | 0.30130  |
| 5  | H  | H5   | 0.01330  | 0.11032  | 0.10002  |
| 6  | H  | H6   | 0.13819  | 0.27613  | 0.10000  |
| 7  | O  | O7   | 0.01668  | 0.22308  | 0.25279  |
| 8  | O  | O8   | 0.14199  | 0.05625  | 0.25267  |
| 9  | O  | O9   | 0.01397  | 0.11037  | 0.14868  |
| 10 | O  | O10  | 0.13843  | 0.27698  | 0.14866  |
| 11 | Co | Co11 | 0.26511  | 0.00011  | 0.20057  |
| 12 | Co | Co12 | 0.39012  | 0.16660  | 0.20078  |
| 13 | H  | H13  | 0.26991  | 0.22372  | 0.30141  |
| 14 | H  | H14  | 0.39410  | 0.05614  | 0.30130  |
| 15 | H  | H15  | 0.26330  | 0.11032  | 0.10002  |
| 16 | H  | H16  | 0.38819  | 0.27613  | 0.10000  |
| 17 | O  | O17  | 0.26668  | 0.22308  | 0.25279  |
| 18 | O  | O18  | 0.39199  | 0.05625  | 0.25267  |
| 19 | O  | O19  | 0.26397  | 0.11037  | 0.14868  |
| 20 | O  | O20  | 0.38843  | 0.27698  | 0.14866  |
| 21 | Co | Co21 | 0.51511  | 0.00011  | 0.20057  |

|       |      |         |         |         |
|-------|------|---------|---------|---------|
| 22 Co | Co22 | 0.64012 | 0.16660 | 0.20078 |
| 23 H  | H23  | 0.64410 | 0.05614 | 0.30130 |
| 24 H  | H24  | 0.51330 | 0.11032 | 0.10002 |
| 25 H  | H25  | 0.63819 | 0.27613 | 0.10000 |
| 26 O  | O26  | 0.64199 | 0.05625 | 0.25267 |
| 27 O  | O27  | 0.51397 | 0.11037 | 0.14868 |
| 28 O  | O28  | 0.63843 | 0.27698 | 0.14866 |
| 29 Co | Co29 | 0.76511 | 0.00011 | 0.20057 |
| 30 Co | Co30 | 0.89012 | 0.16660 | 0.20078 |
| 31 H  | H31  | 0.76991 | 0.22372 | 0.30141 |
| 32 H  | H32  | 0.89410 | 0.05614 | 0.30130 |
| 33 H  | H33  | 0.76330 | 0.11032 | 0.10002 |
| 34 H  | H34  | 0.88819 | 0.27613 | 0.10000 |
| 35 O  | O35  | 0.76668 | 0.22308 | 0.25279 |
| 36 O  | O36  | 0.89199 | 0.05625 | 0.25267 |
| 37 O  | O37  | 0.76397 | 0.11037 | 0.14868 |
| 38 O  | O38  | 0.88843 | 0.27698 | 0.14866 |
| 39 Co | Co39 | 0.01511 | 0.33345 | 0.20057 |
| 40 Co | Co40 | 0.14012 | 0.49993 | 0.20078 |
| 41 H  | H41  | 0.01991 | 0.55705 | 0.30141 |
| 42 H  | H42  | 0.14410 | 0.38947 | 0.30130 |
| 43 H  | H43  | 0.01330 | 0.44366 | 0.10002 |
| 44 H  | H44  | 0.13819 | 0.60947 | 0.10000 |
| 45 O  | O45  | 0.01668 | 0.55642 | 0.25279 |
| 46 O  | O46  | 0.14199 | 0.38958 | 0.25267 |
| 47 O  | O47  | 0.01397 | 0.44371 | 0.14868 |

|            |         |         |         |
|------------|---------|---------|---------|
| 48 O O48   | 0.13843 | 0.61032 | 0.14866 |
| 49 Co Co49 | 0.26511 | 0.33345 | 0.20057 |
| 50 Co Co50 | 0.39012 | 0.49993 | 0.20078 |
| 51 H H51   | 0.26991 | 0.55705 | 0.30141 |
| 52 H H52   | 0.26330 | 0.44366 | 0.10002 |
| 53 H H53   | 0.38819 | 0.60947 | 0.10000 |
| 54 O O54   | 0.26668 | 0.55642 | 0.25279 |
| 55 O O55   | 0.26397 | 0.44371 | 0.14868 |
| 56 O O56   | 0.38843 | 0.61032 | 0.14866 |
| 57 Co Co57 | 0.51511 | 0.33345 | 0.20057 |
| 58 Co Co58 | 0.64012 | 0.49993 | 0.20078 |
| 59 H H59   | 0.51991 | 0.55705 | 0.30141 |
| 60 H H60   | 0.51330 | 0.44366 | 0.10002 |
| 61 H H61   | 0.63819 | 0.60947 | 0.10000 |
| 62 O O62   | 0.51668 | 0.55642 | 0.25279 |
| 63 O O63   | 0.51397 | 0.44371 | 0.14868 |
| 64 O O64   | 0.63843 | 0.61032 | 0.14866 |
| 65 Co Co65 | 0.76511 | 0.33345 | 0.20057 |
| 66 Co Co66 | 0.89012 | 0.49993 | 0.20078 |
| 67 H H67   | 0.76991 | 0.55705 | 0.30141 |
| 68 H H68   | 0.76330 | 0.44366 | 0.10002 |
| 69 H H69   | 0.88819 | 0.60947 | 0.10000 |
| 70 O O70   | 0.76668 | 0.55642 | 0.25279 |
| 71 O O71   | 0.76397 | 0.44371 | 0.14868 |
| 72 O O72   | 0.88843 | 0.61032 | 0.14866 |
| 73 Co Co73 | 0.01511 | 0.66678 | 0.20057 |

|            |         |         |         |
|------------|---------|---------|---------|
| 74 Co Co74 | 0.14012 | 0.83327 | 0.20078 |
| 75 H H75   | 0.01991 | 0.89039 | 0.30141 |
| 76 H H76   | 0.14410 | 0.72281 | 0.30130 |
| 77 H H77   | 0.01330 | 0.77699 | 0.10002 |
| 78 H H78   | 0.13819 | 0.94280 | 0.10000 |
| 79 O O79   | 0.01668 | 0.88975 | 0.25279 |
| 80 O O80   | 0.14199 | 0.72292 | 0.25267 |
| 81 O O81   | 0.01397 | 0.77704 | 0.14868 |
| 82 O O82   | 0.13843 | 0.94365 | 0.14866 |
| 83 Co Co83 | 0.26511 | 0.66678 | 0.20057 |
| 84 Co Co84 | 0.39012 | 0.83327 | 0.20078 |
| 85 H H85   | 0.26991 | 0.89039 | 0.30141 |
| 86 H H86   | 0.39410 | 0.72281 | 0.30130 |
| 87 H H87   | 0.26330 | 0.77699 | 0.10002 |
| 88 H H88   | 0.38819 | 0.94280 | 0.10000 |
| 89 O O89   | 0.26668 | 0.88975 | 0.25279 |
| 90 O O90   | 0.39199 | 0.72292 | 0.25267 |
| 91 O O91   | 0.26397 | 0.77704 | 0.14868 |
| 92 O O92   | 0.38843 | 0.94365 | 0.14866 |
| 93 Co Co93 | 0.51511 | 0.66678 | 0.20057 |
| 94 Co Co94 | 0.64012 | 0.83327 | 0.20078 |
| 95 H H95   | 0.51991 | 0.89039 | 0.30141 |
| 96 H H96   | 0.64410 | 0.72281 | 0.30130 |
| 97 H H97   | 0.51330 | 0.77699 | 0.10002 |
| 98 H H98   | 0.63819 | 0.94280 | 0.10000 |
| 99 O O99   | 0.51668 | 0.88975 | 0.25279 |

|     |    |       |         |         |         |
|-----|----|-------|---------|---------|---------|
| 100 | O  | O100  | 0.64199 | 0.72292 | 0.25267 |
| 101 | O  | O101  | 0.51397 | 0.77704 | 0.14868 |
| 102 | O  | O102  | 0.63843 | 0.94365 | 0.14866 |
| 103 | Co | Co103 | 0.76511 | 0.66678 | 0.20057 |
| 104 | Co | Co104 | 0.89012 | 0.83327 | 0.20078 |
| 105 | H  | H105  | 0.76991 | 0.89039 | 0.30141 |
| 106 | H  | H106  | 0.89410 | 0.72281 | 0.30130 |
| 107 | H  | H107  | 0.76330 | 0.77699 | 0.10002 |
| 108 | H  | H108  | 0.88819 | 0.94280 | 0.10000 |
| 109 | O  | O109  | 0.76668 | 0.88975 | 0.25279 |
| 110 | O  | O110  | 0.89199 | 0.72292 | 0.25267 |
| 111 | O  | O111  | 0.76397 | 0.77704 | 0.14868 |
| 112 | O  | O112  | 0.88843 | 0.94365 | 0.14866 |
| 113 | O  | O113  | 0.53569 | 0.27966 | 0.35709 |
| 114 | O  | O114  | 0.53886 | 0.34954 | 0.31149 |
| 115 | H  | H115  | 0.50896 | 0.40350 | 0.33789 |
| 116 | H  | H116  | 0.56558 | 0.22571 | 0.33068 |
